# Supplementary material for: Randomised controlled trial to investigate the relationship between mild hypercapnia and cerebral oxygen saturation in patients undergoing major surgery
Source: PubMed Central journal article supplement — BMJ Open. 2020 Feb 16;10(2):e029159. doi: 10.1136/bmjopen-2019-029159 (PMC7045198; doi:10.1136/bmjopen-2019-029159), 2020-02-16
Supplement: bmjopen-2019-029159.draft_revisions.pdf [file bmjopen-2019-029159.draft_revisions.pdf]

# BMJ Open

BMJ Open is committed to open peer review. As part of this commitment we make the peer review history of every article we publish publicly available.

When an article is published we post the peer reviewers' comments and the authors' responses online. We also post the versions of the paper that were used during peer review. These are the versions that the peer review comments apply to.

The versions of the paper that follow are the versions that were submitted during the peer review process. They are not the versions of record or the final published versions. They should not be cited or distributed as the published version of this manuscript.

BMJ Open is an open access journal and the full, final, typeset and author-corrected version of record of the manuscript is available on our site with no access controls, subscription charges or pay-per-view fees (<http://bmjopen.bmj.com>).

If you have any questions on BMJ Open's open peer review process please email [info.bmjopen@bmj.com](mailto:info.bmjopen@bmj.com)

# BMJ Open

## A randomised controlled trial to investigate the relationship between mild hypercapnia and cerebral oxygen saturation in patients undergoing major surgery

|                               |                                                                                                                                                                                                                                                                                                                                                                                                                                                                                                                                                                                                                                                                                                                                                                                                      |
|-------------------------------|------------------------------------------------------------------------------------------------------------------------------------------------------------------------------------------------------------------------------------------------------------------------------------------------------------------------------------------------------------------------------------------------------------------------------------------------------------------------------------------------------------------------------------------------------------------------------------------------------------------------------------------------------------------------------------------------------------------------------------------------------------------------------------------------------|
| Journal:                      | <i>BMJ Open</i>                                                                                                                                                                                                                                                                                                                                                                                                                                                                                                                                                                                                                                                                                                                                                                                      |
| Manuscript ID                 | bmjopen-2019-029159                                                                                                                                                                                                                                                                                                                                                                                                                                                                                                                                                                                                                                                                                                                                                                                  |
| Article Type:                 | Original research                                                                                                                                                                                                                                                                                                                                                                                                                                                                                                                                                                                                                                                                                                                                                                                    |
| Date Submitted by the Author: | 14-Jan-2019                                                                                                                                                                                                                                                                                                                                                                                                                                                                                                                                                                                                                                                                                                                                                                                          |
| Complete List of Authors:     | Wong, Clarence; Austin Hospital, Department of Anaesthesia<br>Churilov, Leonid; The Florey Institute of Neuroscience and Mental Health; University of Melbourne<br>Cowie, Dean; Austin Hospital, Department of Anaesthesia<br>Tan, Chong; Austin Hospital, Department of Anaesthesia<br>Hu, Raymond; Austin Hospital, Department of Anaesthesia<br>Tremewen, David; Austin Hospital, Department of Anaesthesia<br>Pearce, Brett; Austin Hospital, Department of Anaesthesia<br>Pillai, Param; Austin Hospital, Department of Anaesthesia<br>Karalipillai, Dharshi; Austin Hospital, Department of Anaesthesia<br>Bellomo, Rinaldo; Austin Hospital, Department of Intensive Care; University of Melbourne<br>Weinberg, Laurence; Austin Hospital, Department of Anaesthesia; University of Melbourne |
| Keywords:                     | hypercapnia, oximetry, Spectroscopy, Near-Infrared, Respiration, Artificial, Delirium                                                                                                                                                                                                                                                                                                                                                                                                                                                                                                                                                                                                                                                                                                                |
|                               |                                                                                                                                                                                                                                                                                                                                                                                                                                                                                                                                                                                                                                                                                                                                                                                                      |

SCHOLARONE™  
Manuscripts

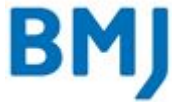

I, the Submitting Author has the right to grant and does grant on behalf of all authors of the Work (as defined in the below author licence), an exclusive licence and/or a non-exclusive licence for contributions from authors who are: i) UK Crown employees; ii) where BMJ has agreed a CC-BY licence shall apply, and/or iii) in accordance with the terms applicable for US Federal Government officers or employees acting as part of their official duties; on a worldwide, perpetual, irrevocable, royalty-free basis to BMJ Publishing Group Ltd ("BMJ") its licensees and where the relevant Journal is co-owned by BMJ to the co-owners of the Journal, to publish the Work in this journal and any other BMJ products and to exploit all rights, as set out in our [licence](#).

The Submitting Author accepts and understands that any supply made under these terms is made by BMJ to the Submitting Author unless you are acting as an employee on behalf of your employer or a postgraduate student of an affiliated institution which is paying any applicable article publishing charge ("APC") for Open Access articles. Where the Submitting Author wishes to make the Work available on an Open Access basis (and intends to pay the relevant APC), the terms of reuse of such Open Access shall be governed by a Creative Commons licence – details of these licences and which [Creative Commons](#) licence will apply to this Work are set out in our licence referred to above.

Other than as permitted in any relevant BMJ Author's Self Archiving Policies, I confirm this Work has not been accepted for publication elsewhere, is not being considered for publication elsewhere and does not duplicate material already published. I confirm all authors consent to publication of this Work and authorise the granting of this licence.

1  
2  
3  
4  
5 **A randomised controlled trial to investigate the relationship between mild hypercapnia**  
6 **and cerebral oxygen saturation in patients undergoing major surgery**  
7  
8  
9

10 **Authors:** Clarence Wong<sup>1,2</sup>, Leonid Churilov<sup>2,3</sup>, Dean Cowie<sup>1</sup>, Chong Tan<sup>1</sup>, Raymond Hu<sup>1</sup>,  
11 David Tremewen<sup>1</sup>, Brett Pearce<sup>1</sup>, Param Pillai<sup>1</sup>, Dharshi Karalipillai<sup>1</sup>, Rinaldo Bellomo<sup>1,2</sup>,  
12 Laurence Weinberg<sup>1,2</sup>  
13

- 14  
15 1. Department of Anaesthesia, Austin Hospital, Heidelberg, Victoria, Australia;  
16  
17 2. University of Melbourne, Parkville, Victoria, Australia;  
18  
19 3. The Florey Institute of Neuroscience and Mental Health, Heidelberg, Victoria, Australia  
20  
21  
22  
23

24 **Correspondence**

25 A/Prof Laurence Weinberg

26 Department of Anesthesia, Austin Hospital

27 145 Studley Road, Heidelberg, Victoria 3084, Australia

28 Phone number: (61) 03 94965000

29 Email: [laurence.weinberg@austin.org.au](mailto:laurence.weinberg@austin.org.au)  
30  
31  
32  
33  
34  
35  
36

37 **Word Count**

38 Abstract: 279

39 Introduction: 239

40 Methods: 1553

41 Results: 741

42 Discussion: 1213

43 Conclusion: 81

44 Body text: 3827  
45  
46  
47  
48  
49  
50  
51  
52  
53  
54  
55  
56  
57  
58  
59  
60

## **Abstract**

**Background:** The effects of hypercapnia on regional cerebral oxygen saturation (rSO<sub>2</sub>) during surgery are unclear. We hypothesised that, compared with targeted normocapnia (TN), targeted mild hypercapnia (TMH) during major surgery would increase rSO<sub>2</sub>.

**Methods:** We performed a prospective, randomised controlled trial in adult participants undergoing major surgery at a tertiary centre in Victoria, Australia. TMH (PaCO<sub>2</sub> 45-55 mmHg) or TN (PaCO<sub>2</sub> 35-40 mmHg) was delivered via controlled ventilation throughout surgery. The primary endpoint was the absolute difference between two groups in percentage change in rSO<sub>2</sub> from baseline to completion of surgery. Secondary endpoints included the incidence of postoperative delirium and length of stay (LOS) in hospital.

**Results:** We randomised 40 participants (20 to TMH and 20 to TN). The median [IQR] PaCO<sub>2</sub> in the TMH group was 51.5 mmHg [46.9 to 60.9] vs. 34.8 mmHg [32.8 to 38.1] in the TN group ( $P<0.001$ ). The absolute difference between two groups in percentage change in rSO<sub>2</sub> from baseline to completion of surgery was 19.0% higher in both hemispheres with TMH ( $P<0.001$ ). On the random-effect repeated measures analysis, the difference in % $\Delta$ rSO<sub>2</sub> on both left and right between the two groups diverged with time with the TMH group exhibiting smaller percentage decrease over time compared to the TN group. Postoperative delirium was higher in the TN group (risk difference 0.3, 95% CI [0.1 to 0.5],  $P=0.02$ ). Length of stay was similar between groups (5 days vs. 5 days;  $P=0.99$ ).

**Conclusions:** This study provides preliminary evidence that in patients undergoing major surgery, TMH is associated with a larger increase in rSO<sub>2</sub> from baseline on both the left and right cerebral cortex. Our findings provide the rationale for larger studies of TMH during surgery.

**Clinical trial registration:** The Australian New Zealand Clinical Trials Registry, unique identification number: ACTRN12616000320459

**Keywords:** Hypercapnia; Oximetry; Spectroscopy, Near-Infrared; Respiration, Artificial; Delirium

## **Article Summary**

### *Strengths of this study*

- High internal validity due to blinding and random allocation to groups
- Frequent sampling of oximetry data throughout monitoring period
- Robust statistical analysis without any data distortion and misrepresentation
- Non-invasive nature of near-infrared spectroscopy (NIRS) derived regional cerebral oxygen saturation (rSO<sub>2</sub>)

### *Limitations of this study*

- Study findings do not apply to emergency surgeries, intra-cranial surgeries, or surgeries requiring one lung ventilation
- rSO<sub>2</sub> measurements rely on the assumption that rSO<sub>2</sub> is homogenous in the brain
- Not statistically powered to investigate post-operative delirium
- Attending anaesthetists cannot be blinded due to the nature of the intervention

## **Acknowledgement**

### **Funding Statement**

Masimo provided the oximetry sensors used for this trial. This study conception, design, trial management, data collection, data analyses, and the writing of the manuscript, have been executed completely independently of Masimo and any other external organizations. This work was supported by the Department of Anaesthesia Research Fund, Austin Hospital, Heidelberg, Victoria, Australia

### **Declaration of interest**

All authors declare no conflict of interest.

### **Presentation**

Findings of this study were presented as a poster presentation at the PostGraduate Assembly in Anesthesiology, 8-12 December 2018, New York, USA

## **Introduction**

In patients undergoing major surgery, the effects of mild hypercapnia on regional cerebral oxygen saturation (rSO<sub>2</sub>) have not been fully examined, and any beneficial or harmful effects of hypercapnia as a therapeutic ventilation strategy to improve cerebral oxygenation are unknown. In animal models, CO<sub>2</sub> is a well-known vasodilator improving cerebral blood flow.<sup>1-3</sup> The neuroprotective mechanisms of mild hypercapnia, whilst not completely understood, have been postulated to be a result of increase in cerebral blood flow, enhancement of oxygen delivery, improvements in cerebral glucose utilisation and oxidative metabolism,<sup>4,5</sup> and activation of ATP-sensitive potassium channels to maintain normal neuronal activity in the setting of ischemia.<sup>6</sup>

The recent emergence of near-infrared spectroscopy (NIRS) based cerebral oximetry has provided a practical method to measure rSO<sub>2</sub> continuously and non-invasively. This technology has gained substantial supportive evidence in resuscitation, critical care, and surgical applications.<sup>7-9</sup> Numerous studies have shown that NIRS can be applied clinically in the resuscitation and cardiac surgery settings where cerebral desaturation events can be both effectively monitored and managed.<sup>10-13</sup> However, the relationship between mild hypercapnia and rSO<sub>2</sub> in patients undergoing surgery without pre-existing cerebral desaturation events remains unclear.

Accordingly, we conducted a randomised controlled trial to test the hypothesis that targeted mild hypercapnia (TMH) during elective major surgery would increase cerebral oxygen saturation compared to targeted normocapnia (TN). As a secondary aim, we evaluated if TMH would affect the development of postoperative delirium, a commonly reported complication in the immediately peri-operative setting.<sup>14-16</sup>

## **Methods**

### *Ethics approval and clinical trial registration*

The study was approved by the Austin Health Research and Ethics Committee on 6<sup>th</sup> January 2016 (HREC/15/Austin/488) and all participants gave written informed consent. The study was prospectively registered on 10<sup>th</sup> March 2016 with the Australian New Zealand Clinical Trials Registry (ACTRN12616000320459). The study was reported in accordance with the CONSORT Guidelines for reporting randomised trials.<sup>17</sup>

### *Trial design, setting, and population*

Between March 2016 and March 2017, we conducted the randomised controlled trial at the Austin Hospital, a university teaching tertiary metropolitan hospital at Heidelberg, Victoria. Following pre-operative assessment at the anaesthesia pre-admissions clinic and the receipt of written informed consent, eligible patients undergoing elective major surgery were identified. Inclusion criteria included the following: adult patients (age greater than 18 years), surgery of greater than 2 hours expected duration requiring at least one overnight admission, a clinical indication for continuous blood pressure monitoring via an invasive arterial line, and intermittent positive pressure ventilation via an endotracheal tube as part of standard anaesthesia care. Exclusion criteria included patients undergoing cardiac surgery, procedures requiring one lung isolation liver transplantation, intracranial surgery, GCS less than 15, known cognitive impairment, intellectual disability or a mental illness, moderate pulmonary hypertension (mean pulmonary arterial pressure greater than 40 mmHg), and American Society of Anesthesiology status V.

### *Randomisation and blinding*

An independent statistician generated a computerised sequence of 40 allocation codes, 20 for each group. A research nurse sealed the allocation codes into sequentially numbered opaque envelopes. Study participants, surgeons, and all peri-operative staff were blinded to treatment allocation. However, it was not possible to blind the attending anaesthetist who was responsible for delivery of the intervention. Immediately after induction of anaesthesia, patients were randomised to either targeted mild hypercapnia ( $PaCO_2$  45-55 mmHg) or



1  
2  
3 targeted normocapnia ( $PaCO_2$  35-40 mmHg). The end-tidal carbon dioxide ( $EtCO_2$ ) was  
4 titrated accordingly in order to achieve the desired intervention but the anaesthetist did not  
5 have a  $rSO_2$  goal to titrate to. Data collection for all the trial outcomes was collected by an  
6 independent researcher blinded to treatment allocation. The sequence was decoded after the  
7 data was analysed.  
8  
9  
10  
11  
12  
13  
14

### 15 *Outcomes and data collection*

16 The primary endpoint was the absolute difference between the TMH and TN groups in  
17 percentage change in  $rSO_2$  from baseline to completion of surgery. Secondary endpoints  
18 evaluated the effects of mild hypercapnia on the incidence of postoperative delirium, intra-  
19 operative pH, bicarbonate, base excess, serum potassium, and length of hospital stay (LOS).  
20  
21  
22  
23  
24

### 25 *Measurement of $rSO_2$*

26 Regional cerebral oxygen saturation was collected using the Masimo  $O_3^{TM}$  regional oximetry  
27 component of the Root<sup>TM</sup> Patient Monitor platform ( $O_3^{TM}$  Masimo, Irvine, CA). This regional  
28 oximetry device uses NIRS and reflectance oximetry to monitor  $rSO_2$  in the brain, capturing  
29 both absolute and trend  $rSO_2$  data. Absolute oximetry data is defined as the regional oxygen  
30 saturation value measured by the oximetry probes calibrated by a fixed ratio between arterial  
31 to venous blood, whereas the trend oximetry data is defined as the change in regional oxygen  
32 saturation value measured by the oximetry probes. The measurement errors for absolute and  
33 trend data are reported to be approximately 4% and 3% respectively when tested against  
34 reference blood samples taken from the radial artery and internal jugular bulb vein.<sup>18</sup>  
35 Following manufacturer instructions, two NIRS sensors were attached to patient's left and  
36 right forehead, recording both absolute and trend data bilaterally. After the recording of  
37 baseline cerebral oximetry, only absolute oximetry data were extracted and analysed.  
38 Regional cerebral oxygen saturation was collected before commencing any premedication  
39 and before induction of anesthesia. Measurements were recorded every two seconds until the  
40 last surgical suture was sited. Data were exported as comma separated values files after  
41 surgery and processed using manually written R scripts on RStudio v. 1.0.136  
42 (**Supplementary File 1**). Data from the left and right forehead were analysed separately.  
43  
44  
45  
46  
47  
48  
49  
50  
51  
52  
53  
54  
55  
56  
57

### 58 *Measurement of delirium*

1  
2  
3 Delirium was assessed using a validated and widely utilized Confusion Assessment Method  
4 (CAM) rating scale, adapted from Inouye *et al.*, immediately on arrival to hospital, then  
5 within 18-24 hours after surgery.<sup>19,20</sup> Diagnosis of delirium requires the presence of both  
6 acute onset with fluctuating course and inattention, together with either disorganised thinking  
7 or altered level of consciousness. A single trained interviewer, blinded to randomisation, and  
8 proficient and trained in the Confusion Assessment Method, conducted all the assessments  
9 pre-operatively when patient arrived at the hospital and at 8am on the next day after surgery  
10 in the ward (within 18-24 hours postoperatively). The baseline cognitive function was not  
11 formally assessed with collateral history from family or carers.  
12  
13  
14  
15  
16  
17  
18  
19

### 20 *Measurement of PaCO<sub>2</sub> and intra-operative adherence to group allocation*

21 Immediately after tracheal intubation with a cuffed endotracheal tube, minute ventilation was  
22 adjusted to achieve an EtCO<sub>2</sub> concentration of 45-55 mmHg in the TMH group or 35-40  
23 mmHg in the TN group. Due to presence of alveolar dead space, EtCO<sub>2</sub> can be lower than  
24 PaCO<sub>2</sub> by up to 5 mmHg. Therefore, an arterial blood gas was obtained to check PaCO<sub>2</sub> and  
25 ventilation was further adjusted accordingly to achieve the desired PaCO<sub>2</sub> target ranges. The  
26 PaCO<sub>2</sub>-EtCO<sub>2</sub> gradient was then maintained throughout the surgery, with the assumption that  
27 the PaCO<sub>2</sub> would remain constant. Additional ABG were sampled at the discretion of the  
28 anaesthetist if the gradient required re-evaluation e.g. requirements for adjustment of  
29 ventilation setting. Finally, at completion of surgery, an ABG was sampled to accurately  
30 document the PaCO<sub>2</sub> value, and to assess whether PaCO<sub>2</sub> was being maintained within target  
31 values. All arterial blood gas variables were collected by ABL80 FLEX Blood Gas Analyzer  
32 (Radiometer, Copenhagen, Denmark).  
33  
34  
35  
36  
37  
38  
39  
40  
41  
42  
43  
44

### 45 *Standardisation of care*

46 All patients underwent pre-operative multidisciplinary team assessment including a  
47 haematology led multimodal peri-operative haemoglobin optimisation program based on the  
48 National Blood Authority of Australia's patient blood management initiatives to optimise  
49 pre-operative red cell mass, minimise peri-operative blood loss and tolerate postoperative  
50 anaemia.<sup>21</sup> All participants were fasted two hours for clear fluids and six hours for solids  
51 according to standard hospital fasting protocols. All participants received a general  
52 anaesthetic with propofol for induction, an inhalational agent for maintenance of anaesthesia,  
53 with 50% oxygen:air mixture to maintain oxygen saturations above 97%. Routine monitoring  
54 for all participants included continuous ECG, pulse oximetry, temperature, bispectral index  
55  
56  
57  
58  
59  
60

(BIS) monitoring, and neuromuscular monitoring. Adequate depth of anaesthesia was ensured by targeting BIS reading between 40 and 60. Conduct of anaesthesia, including the use of additional invasive monitoring, intra-operative medications, fluids intervention, and use of vasoactive medications, were entirely at the discretion of the attending anaesthetist. In keeping with hospital protocol, we transfused blood if haemoglobin concentration was less than 75 g dL<sup>-1</sup>, or less than 80 g dL<sup>-1</sup> in the presence of ongoing bleeding.

### *Sample size calculations*

Based on our institution's pilot data and reported figures, normal rSO<sub>2</sub> values for awake patients could range from 60% to 80%<sup>22</sup>, which we assumed to be the case at the baseline (beginning of surgery). We assumed no change in rSO<sub>2</sub> in the control group and considered an absolute difference between the groups in percentage change in rSO<sub>2</sub> value from the baseline to completion of surgery of 15% to be clinically important. Thus, the absolute changes in rSO<sub>2</sub> from the baseline to the end of surgery were hypothesised to be 0% in control group and 12% (15% percentage change from the baseline of 80% rSO<sub>2</sub>) in the intervention group. Assuming two-tailed threshold for statistical significance of 0.05 and common standard deviation of the absolute change of 10%, the total sample size of 40 patients (equally distributed between two groups) will yield the 0.9 power to observe large treatment effect (Cohen's d=1.1 or higher).

### *Statistical Analyses*

The study was reported in accordance with the Statistical Analyses and Methods in the Published Literature (SAMPL) Guidelines.<sup>23</sup> Statistical analysis was performed using commercial statistical software STATA/IC v.13 with a *P* value of 0.05 to indicate statistical significance. Figures and tables were created by manually written R scripts on RStudio v. 1.0.136 (**Supplementary File 2**). Normality was determined by the Shapiro–Wilk test, further confirmed by manual inspection of the skewness and kurtosis of the data. Parametric continuous data were compared by the Student's t-test, and non-parametric continuous data were compared by the Kruskal Wallis rank sum test. For normally distributed data, results were presented as mean (standard deviation); and for non-parametric data, results were presented as median [inter-quartile range] unless otherwise stated. Fisher's exact test was used in the analysis of all categorical variables. For the primary outcome we compared the absolute difference between the TMH and TN groups in percentage change in rSO<sub>2</sub> from

1  
2  
3 baseline to completion of surgery using an unpaired, two-tailed t-test. A more detailed  
4 longitudinal analysis of time-by-treatment interaction was also conducted using a random  
5 effect generalised least squares regression model (due to the repeated measures nature of the  
6 data) with percentage change in rSO<sub>2</sub> at a given time point throughout the surgery as the  
7 output, the treatment group and the time (minutes from start of surgery), as well as the time-  
8 by-treatment interaction term as inputs. The duration of surgery varied between different  
9 patients and therefore, in order to compare %ΔrSO<sub>2</sub> at different time points across all the  
10 patients, the time was measured using “minutes from the start of surgery” metric. For  
11 robustness analyses, similar models adjusted for age, baseline oximetry values, and pre-  
12 operative haemoglobin levels were implemented, as well as models where time was measured  
13 not in minutes, but as a percentage of total surgery duration.  
14  
15  
16  
17  
18  
19  
20  
21  
22  
23  
24  
25  
26  
27  
28  
29  
30  
31  
32  
33  
34  
35  
36  
37  
38  
39  
40  
41  
42  
43  
44  
45  
46  
47  
48  
49  
50  
51  
52  
53  
54  
55  
56  
57  
58  
59  
60

## **Results**

Seventy-seven participants were screened for eligibility. Thirty-seven patients were excluded because they did not meet the inclusion criteria ( $n=6$ ), declined to participate ( $n=30$ ), or due to anaesthetist objection to intervention ( $n=1$ ). For logistical reasons, recruitment could only be performed when the interviewer conducting the CAM testing was available. The Consort diagram is presented in **Figure 1**. There were no violations or breaches of the study protocol, however two participants in the hypercapnic group had failure of bilateral probe attachment and lead connection problem that were unable to be rescued. These patients were subsequently excluded from the analyses of oxygenation as no  $rSO_2$  data were captured and were included in the analysis of all other variables and endpoints. In the hypercapnic group, three participants had unilateral discontinuous oximetry readings due to intermittent signal dropout. In the normocapnic group, signal dropout occurred in two patients on the left side. The corresponding data were excluded.

The baseline participant characteristics are summarised in **Table 1**. Both groups were similar in terms of gender, age, weight, body mass index, ASA physical status, and type of surgery performed. In terms of co-morbidities, both groups were similar except for the presence of chronic obstructive pulmonary disease. There was 100% compliance to the designated  $PaCO_2$  intra-operative targets. The median [IQR]  $PaCO_2$  in the TMH group and TN groups were 51.5 mmHg [46.9 to 60.9] and 34.8 mmHg [32.8 to 38.1] respectively ( $P<0.001$ ). With regards to surgical characteristics, both groups had similar median [IQR] duration of surgery: 219 min [124 to 304] in the TMH group and 144 min [108 to 218] in the TN group ( $P=0.121$ ).  $PaO_2$  was similar between the two groups: 156.8 mmHg [146.3 to 217.2] in the TMH group and 142.5 mmHg [122.5 to 199.1] in the TN group ( $P=0.380$ ). Oxygen saturation was similar: 98.5% in the TMH group [98.1 to 99.0], and 98.5% in the TN group [97.9 to 99.0] ( $P=0.834$ ). Both groups also had similar mean arterial pressure intra-operatively (repeated measure ANOVA  $P=0.128$ ) and similar total dose of intra-operative opioid received, 21.67 mg in the TMH group [13.75 to 32.50] and 16.67 mg in the TN group [10.00 to 22.50] ( $P=0.22$ ).

### *Primary endpoint*

1  
2  
3 On the left hemisphere, the median [IQR] baseline oximetry was 68.7% [63.9 to 72.2] in the  
4 TMH group vs. 63.4% [57.3 to 69.6] in the TN group ( $P=0.233$ ). On the right hemisphere the  
5 median [IQR] baseline oximetry was 67.9% [64.6 to 70.3] in the TMH group vs. 64.0% [59.4  
6 to 69.9] TN group ( $P=0.286$ ). On both sides, the  $\% \Delta rSO_2$  was greater in the TMH group than  
7 the TN group throughout the duration of surgery (**Figure 2**). The average percentage changes  
8 in  $rSO_2$  from the baseline to the conclusion of the surgery in TMH group were +8.56% ( $\pm$ SD  
9 18.90%) on the left and +13.86% ( $\pm$ SD 18.17%) on the right, and in TN group they were -  
10 6.18% ( $\pm$ SD 17.24%) on the left and -5.48% ( $\pm$ SD 18.94%) on the right. The resulting  
11 treatment effects were 19% (95% CI [9.2 to 28.8];  $P<0.001$ ) on the left and 19% (95% CI  
12 [10.9 to 27.0];  $P<0.001$ ) on the right (**Table 2**).

21  
22 On the longitudinal time-by-treatment interaction analysis, the difference in  $\% \Delta rSO_2$  on both  
23 left and right between the two groups diverged with time with the intervention group  
24 exhibiting smaller percentage decrease over time compared to the control group (time-by-  
25 treatment interaction  $P<0.001$  for both left and right hemispheres). We obtained very similar  
26 results on robustness analyses when the above model was adjusted for age, baseline oximetry  
27 and pre-operative haemoglobin levels, as well as when percentage of total duration of surgery  
28 instead of minutes from the start of surgery were included.

### 35 *Secondary outcomes*

36 Postoperative delirium was statistically significantly less common in the TMH group.  
37 Postoperative delirium was present in 0/20 (0%) participants in the TMH group and 6/20  
38 (30%) participants in the TN group (risk difference 0.3, 95% CI [0.1 to 0.5], Fisher's exact  
39  $P=0.02$ ) (**Table 3**). In terms of acid base variables, median intra-operative pH was  
40 statistically significantly lower (7.31 vs. 7.46;  $P<0.001$ ) and intra-operative bicarbonate was  
41 statistically significantly higher (25.00 vs. 24.00 mEq L<sup>-1</sup>;  $P=0.020$ ) in the TMH. No  
42 statistically significant differences in base excess (-1.00 vs. 1.00 mmol L<sup>-1</sup>;  $P=0.069$ ),  
43 potassium (3.98 vs. 4.03 mEq L<sup>-1</sup>;  $P=0.759$ ) and total haemoglobin (130.50 vs. 122.25 g L<sup>-1</sup>;  
44  $P=0.132$ ) were observed intra-operatively. Length of hospital stay was also similar between  
45 the two groups without statistically significant difference (5 vs. 5 days;  $P=0.988$ ). These  
46 results are summarized in **Table 4**.

## 58 **Discussion**

1  
2  
3 We conducted a prospective, single centre, single blinded, randomised controlled trial  
4 evaluating the effects of targeted mild hypercapnia (TMH) and targeted normocapnia (TN) on  
5 regional cerebral oxygen saturation (rSO<sub>2</sub>) in patients undergoing major surgery. TMH led to  
6 a significantly larger increase in both left and right NIRS-derived regional cerebral oxygen  
7 saturation from baseline values, an effect sustained throughout surgery, and becoming more  
8 pronounced with the passage of time. TMH was associated with a lower incidence of  
9 postoperative delirium within 24 hours after surgery.  
10  
11  
12  
13  
14  
15  
16  
17

18 Whilst the relationship between elevated PaCO<sub>2</sub> and cerebral blood flow is well described,<sup>24-</sup>  
19 <sup>26</sup> the associations between hypercapnia and higher rSO<sub>2</sub> are poorly understood. Numerous  
20 factors, for instance, cardiac output, oxygen affinity of haemoglobin, and the ratio of cerebral  
21 arterial to venous blood volume, affect rSO<sub>2</sub> in the setting of hypercapnia, but changes in  
22 PaCO<sub>2</sub> and CBF, in turn, have direct influence on these factors. To complicate the subject  
23 further, the duration of effect of hypercapnia on rSO<sub>2</sub> is unknown. In our study, confounding  
24 variables, such as MAP, PaO<sub>2</sub>, and Hb were similar between the TMH and TN groups.  
25 However, pH, which directly affects the oxygen affinity of haemoglobin via the Bohr Effect,  
26 was significantly different. Since we cannot measure the ratio of arterial to venous blood  
27 volume, it would be impetuous to comment on the mechanism behind the observed higher  
28 rSO<sub>2</sub> values in TMH. Clinically, similar observations have been reported previously.  
29 Eastwood *et al.* found that mild hypercapnia resulted in higher rSO<sub>2</sub> values in post-cardiac  
30 arrest patients when rSO<sub>2</sub> values at the end of the normocapnic period and the end of the  
31 hypercapnic period were compared.<sup>27</sup> Similarly rSO<sub>2</sub> remained higher in hypercapnic patients  
32 throughout shoulder surgery, and less cerebral desaturation events were observed by Murphy  
33 *et al.*<sup>28</sup> Giardino *et al.* reviewed how changes in respiratory alternations in patients with  
34 anxiety alter CBF and found that changes in CBF over time in acute hypercapnia or  
35 hypocapnia have high individual variability and CBF might never attain a true steady-state  
36 period with time.<sup>29</sup> Our study is one of the few randomised-controlled trials that investigate  
37 rSO<sub>2</sub> change over time in the setting of hypercapnia, and the sustained difference in rSO<sub>2</sub>  
38 over time observed is novel.  
39  
40  
41  
42  
43  
44  
45  
46  
47  
48  
49  
50  
51  
52  
53  
54  
55  
56

57 Interestingly, the incidence of postoperative delirium after surgery was lower in the TMH  
58 group while LOS remained similar between the groups. There has been conflicting evidence  
59  
60

1  
2  
3 in the literature regarding the relationship between rSO<sub>2</sub> and LOS or postoperative cognitive  
4 performance. Murkin *et al.* found that monitoring and reacting to cerebral desaturation during  
5 coronary artery bypass surgery was associated with clinical benefits.<sup>13</sup> Patients with shorter  
6 LOS (<10 days) had higher mean rSO<sub>2</sub>. Intra-operative NIRS rSO<sub>2</sub> monitoring led to a  
7 significant reduction in postoperative cognitive disturbance confirmed by Trafidlo *et al.*<sup>30</sup> but  
8 not Deschamps *et al.*<sup>31</sup> Casati *et al.* also reported that higher rSO<sub>2</sub> led to shorter LOS and  
9 improved Mini-Mental State Examination scores in elderly patients undergoing major  
10 abdominal surgery,<sup>32</sup> and Schoen *et al.* found that low pre-operative rSO<sub>2</sub> was associated with  
11 higher incidence of postoperative delirium. Among patients who started at a normal  
12 saturation level, those who developed delirium had a larger intra-operative drop in rSO<sub>2</sub>.<sup>33</sup>  
13 Our findings were consistent with Schoen *et al.*, however, they need to be interpreted with  
14 caution as the ASA scores and age were slightly higher in the TN group, and our study was  
15 not designed to quantitatively investigate postoperative cognitive performance in hypercapnia.  
16  
17  
18  
19  
20  
21  
22  
23  
24  
25  
26  
27

28 Implications of our findings demonstrate that TMH can be delivered reliably during major  
29 surgery and its effects on rSO<sub>2</sub> can be monitored with NIRS in most patients. Its delivery is  
30 reliably associated with increased levels of rSO<sub>2</sub>, and the relatively higher rSO<sub>2</sub> is sustained  
31 over the duration of surgery, an observation that has not been reported in the literature.  
32 Furthermore, TMH may reduce the incidence of the development of immediate postoperative  
33 delirium. A clinical concern of mild hypercapnia is hypercapnic-induced acidosis and the  
34 subsequent development of hyperkalemia. Whilst a linear correlation between arterial carbon  
35 dioxide and plasma pH is well reported,<sup>34</sup> the relationship between acute hypercarbia,  
36 respiratory acidosis and plasma potassium is also poorly understood.<sup>35</sup> In the present study,  
37 we found no association between hypercarbia and serum potassium concentrations, a finding  
38 also supported by others.<sup>36</sup> We did not observe any other deleterious or adverse effects from  
39 hypercapnic-induced acidosis such as cardiac arrhythmias in our study. Finally, we have  
40 shown that NIRS-based cerebral oximetry is a non-invasive and practical method of  
41 measuring rSO<sub>2</sub>, easily incorporated into the existing collection of routine monitoring  
42 variables, findings that are in agreement with other research groups.<sup>18,37-39</sup>  
43  
44  
45  
46  
47  
48  
49  
50  
51  
52  
53  
54  
55  
56

57 Our study has multiple strengths. Our findings have high internal validity because the study  
58 was a randomised controlled trial with concealed allocation and blinded assessment,  
59  
60



1  
2  
3 minimising selection and ascertainment bias. rSO<sub>2</sub> data were exported directly to RStudio,  
4 and ABG data were analysed by the ABL Blood Gas Analyzer, rendering sampling error  
5 from data entry unlikely, thereby increasing the robustness of our findings. Sampling of  
6 continuous oximetry data resulted in a stream of oximetry data throughout the monitoring  
7 periods, maximizing the details of our assessment. Although the duration of surgery was  
8 different for individual patients, oximetry data were not normalised to another time scale,  
9 enabling a fair comparison of data across the study groups. NIRS-derived rSO<sub>2</sub> has been  
10 criticised for potential extra-cranial contamination that would confound true rSO<sub>2</sub>.<sup>40</sup>  
11 However, there is sufficient evidence to support the accuracy of NIRS-derived rSO<sub>2</sub>,<sup>18,37</sup>  
12 particularly in the case of hypercapnia, where extra-cranial signal interference has been  
13 shown to be insignificant, justifying its reliability.<sup>41</sup> Moreover, as the technology was the  
14 same in both groups, any inaccuracy should not have been a source of bias.

15  
16  
17  
18  
19  
20  
21  
22  
23  
24  
25  
26 Our study also has a number of limitations. The attending anaesthetists were not blinded due  
27 to the nature of the intervention. Nevertheless, bias was mitigated by the fact that  
28 measurements were taken directly from the cerebral oximetry machine and assessment of  
29 delirium was conducted by an independent researcher blinded to the intervention. The  
30 external validity of our findings was restricted by the small sample size from one single  
31 centre. Our findings were not applicable to patients undergoing emergency surgery,  
32 intracranial surgery, or surgery requiring one lung ventilation. The cerebral oximetry probes  
33 were only attached to the forehead, measuring rSO<sub>2</sub> within the frontal cortex region, which  
34 carries the assumption that rSO<sub>2</sub> was homogenous across every area of the brain. This  
35 assumption will need to be tested for the posterior circulation in future studies. Quantification  
36 of device failure rate, despite being a critical consideration, cannot be described by our study  
37 design. Finally, our findings of a greater incidence of early postoperative delirium in the TN  
38 group need to be interpreted with caution as confounders of postoperative delirium were not  
39 controlled, our study was not powered to investigate postoperative delirium, and mental  
40 state was only accessed by CAM, once pre-operatively and once postoperatively.  
41 Accordingly, our findings for delirium should be viewed as hypothesis generating.  
42 Nevertheless, if we were to consider that our effect size observed (i.e. 0.13) could be due to  
43 chance and a smaller effect would be observed in a larger study, an appropriate powered RCT  
44 for this outcome would be very feasible. If the proportion of patients with delirium in the  
45  
46  
47  
48  
49  
50  
51  
52  
53  
54  
55  
56  
57  
58  
59  
60

1  
2  
3 intervention group is 10%, to achieve 90% power, the required sample size for each group  
4 would be ninety two.  
5  
6  
7

## 8 **Conclusion**

9  
10 In summary, in patients undergoing elective major surgery, mild hypercapnia was associated  
11 with a larger increase in regional cerebral oxygen saturation from baseline on both the left  
12 and the right cerebral cortex. This effect was sustained and became more marked with the  
13 passage of time intra-operatively, resulting in a clear separation in the percentage change of  
14 regional cerebral oxygen saturation between the TMH and TN over time. These preliminary  
15 findings provide the rationale and justification for larger investigations of this intervention.  
16  
17  
18  
19  
20  
21  
22

## 23 **Author Contributions**

24  
25  
26 Clarence Wong: This author contributed to data collection, data analysis, and writing up of  
27 manuscript  
28

29 Leonid Churilov: This author contributed to data analysis and writing up of manuscript

30  
31 Dean Cowie: This author contributed to patient recruitment, data collection, and writing up of  
32 manuscript  
33

34 Chong Tan: This author contributed to patient recruitment and writing up of manuscript

35  
36 Raymond Hu: This author contributed to patient recruitment and writing up of manuscript

37  
38 David Tremewen: This author contributed to patient recruitment and writing up of manuscript

39  
40 Brett Pearce: This author contributed to patient recruitment and writing up of manuscript

41  
42 Param Pillai: This author contributed to data collection and writing up of manuscript

43  
44 Dharshi Karalipillai: This author contributed to data collection and writing up of manuscript

45  
46 Rinaldo Bellomo: This author contributed to study design and writing up of manuscript

47  
48 Laurence Weinberg: This author designed the study, contributed to patient recruitment, data  
49 collection, data analysis and writing up of manuscript  
50  
51  
52  
53  
54  
55  
56  
57  
58  
59  
60

## References

1. Brosnan RJ, Steffey EP, LeCouteur RA, Imai A, Farver TB, Kortz GD. Effects of ventilation and isoflurane end-tidal concentration on intracranial and cerebral perfusion pressures in horses. *American journal of veterinary research*. 2003;64(1):21-25.
2. Faraci FM, Breese KR, Heistad DD. Cerebral vasodilation during hypercapnia. Role of glibenclamide-sensitive potassium channels and nitric oxide. *Stroke*. 1994;25(8):1679-1683.
3. Hino JK, Short BL, Rais-Bahrami K, Seale WR. Cerebral blood flow and metabolism during and after prolonged hypercapnia in newborn lambs. *Critical care medicine*. 2000;28(10):3505-3510.
4. Nakahata MDK, Kinoshita MDPDH, Hirano MDY, Kimoto MDY, Iranami MDH, Hatano MDPDY. Mild Hypercapnia Induces Vasodilation via Adenosine Triphosphate-sensitive K<sup>+</sup> Channels in Parenchymal Microvessels of the Rat Cerebral Cortex. *Anesthesiology*. 2003;99(6):1333-1339.
5. Kaku DA, Giffard RG, Choi DW. Neuroprotective effects of glutamate antagonists and extracellular acidity. *Science (New York, NY)*. 1993;260(5113):1516-1518.
6. Vannucci RC, Brucklacher RM, Vannucci SJ. Effect of Carbon Dioxide on Cerebral Metabolism during Hypoxia-Ischemia in the Immature Rat. *Pediatr Res*. 1997;42(1):24-29.
7. Murkin JM, Arango M. Near-infrared spectroscopy as an index of brain and tissue oxygenation. *British journal of anaesthesia*. 2009;103 Suppl 1:i3-13.
8. Elizabeth A, Frost M. Cerebral oximetry: emerging applications for an established technology. *Anesthesiol News*. 2012;38:10.
9. Stepan J, Hogue CW, Jr. Cerebral and tissue oximetry. *Best Pract Res Clin Anaesthesiol*. 2014;28(4):429-439.
10. Ahn A, Yang J, Inigo-Santiago L, Parnia S. A feasibility study of cerebral oximetry monitoring during the post-resuscitation period in comatose patients following cardiac arrest. *Resuscitation*. 2014;85(4):522-526.
11. Storm C, Leithner C, Krannich A, et al. Regional cerebral oxygen saturation after cardiac arrest in 60 patients--a prospective outcome study. *Resuscitation*. 2014;85(8):1037-1041.

12. Ito N, Nishiyama K, Callaway CW, et al. Noninvasive regional cerebral oxygen saturation for neurological prognostication of patients with out-of-hospital cardiac arrest: a prospective multicenter observational study. *Resuscitation*. 2014;85(6):778-784.
13. Murkin JM, Adams SJ, Novick RJ, et al. Monitoring brain oxygen saturation during coronary bypass surgery: a randomised, prospective study. *Anesth Analg*. 2007;104(1):51-58.
14. Robinson TN, Eiseman B. Postoperative delirium in the elderly: diagnosis and management. *Clinical Interventions in Aging*. 2008;3(2):351-355.
15. Liu LL, Leung JM. Predicting adverse postoperative outcomes in patients aged 80 years or older. *Journal of the American Geriatrics Society*. 2000;48(4):405-412.
16. Inouye SK. Delirium in older persons. *The New England journal of medicine*. 2006;354(11):1157-1165.
17. Schulz KF, Altman DG, Moher D. CONSORT 2010 Statement: updated guidelines for reporting parallel group randomised trials. *BMJ*. 2010;340.
18. Redford D, Paidy S, Kashif F. Absolute and trend accuracy of a new regional oximeter in healthy volunteers during controlled hypoxia. *Anesth Analg*. 2014;119(6):1315-1319.
19. Inouye SK, van Dyck CH, Alessi CA, Balkin S, Siegel AP, Horwitz RI. Clarifying confusion: the confusion assessment method. A new method for detection of delirium. *Annals of internal medicine*. 1990;113(12):941-948.
20. Sharon K, Inouye MD, MPH. Confusion Assessment Method: Training Manual and Coding Guide, Copyright 2003.
21. National Blood Authority. Blood Management Guidelines: Module 2 Perioperative. 2012; <http://www.nba.gov.au/guidelines/module2/po-mod2.pdf2>.
22. Vretzakis G, Georgopoulou S, Stamoulis K, et al. Cerebral oximetry in cardiac anesthesia. *Journal of thoracic disease*. 2014;6 Suppl 1:S60-69.
23. Lang TA, Altman DG. Basic statistical reporting for articles published in biomedical journals: the "Statistical Analyses and Methods in the Published Literature" or the SAMPL Guidelines. *International journal of nursing studies*. 2015;52(1):5-9.
24. Curley G, Laffey JG, Kavanagh BP. Bench-to-bedside review: carbon dioxide. *Critical care (London, England)*. 2010;14(2):220.

- 1
  - 2
  - 3
  - 4
  - 5
  - 6
  - 7
  - 8
  - 9
  - 10
  - 11
  - 12
  - 13
  - 14
  - 15
  - 16
  - 17
  - 18
  - 19
  - 20
  - 21
  - 22
  - 23
  - 24
  - 25
  - 26
  - 27
  - 28
  - 29
  - 30
  - 31
  - 32
  - 33
  - 34
  - 35
  - 36
  - 37
  - 38
  - 39
  - 40
  - 41
  - 42
  - 43
  - 44
  - 45
  - 46
  - 47
  - 48
  - 49
  - 50
  - 51
  - 52
  - 53
  - 54
  - 55
  - 56
  - 57
  - 58
  - 59
  - 60
25. Yokoyama I, Inoue Y, Kinoshita T, Itoh H, Kanno I, Iida H. Heart and brain circulation and CO<sub>2</sub> in healthy men. *Acta physiologica (Oxford, England)*. 2008;193(3):303-308.
26. Battisti-Charbonney A, Fisher J, Duffin J. The cerebrovascular response to carbon dioxide in humans. *J Physiol*. 2011;589(Pt 12):3039-3048.
27. Eastwood GM, Tanaka A, Bellomo R. Cerebral oxygenation in mechanically ventilated early cardiac arrest survivors: The impact of hypercapnia. *Resuscitation*. 2016;102:11-16.
28. Murphy GS, Szokol JW, Avram MJ, et al. Effect of ventilation on cerebral oxygenation in patients undergoing surgery in the beach chair position: a randomised controlled trial. *British journal of anaesthesia*. 2014;113(4):618-627.
29. Giardino ND, Friedman SD, Dager SR. Anxiety, respiration, and cerebral blood flow: implications for functional brain imaging. *Comprehensive psychiatry*. 2007;48(2):103-112.
30. Trafidlo T, Gaszynski T, Gaszynski W, Nowakowska-Domagala K. Intra-operative monitoring of cerebral NIRS oximetry leads to better postoperative cognitive performance: a pilot study. *International journal of surgery (London, England)*. 2015;16(Pt A):23-30.
31. Deschamps A, Hall R, Grocott H, et al. Cerebral Oximetry Monitoring to Maintain Normal Cerebral Oxygen Saturation during High-risk Cardiac Surgery: A Randomised Controlled Feasibility Trial. *Anesthesiology*. 2016;124(4):826-836.
32. Casati A, Fanelli G, Pietropaoli P, et al. Continuous monitoring of cerebral oxygen saturation in elderly patients undergoing major abdominal surgery minimizes brain exposure to potential hypoxia. *Anesth Analg*. 2005;101(3):740-747, table of contents.
33. Schoen J, Meyerrose J, Paarmann H, Heringlake M, Hueppe M, Berger K-U. Pre-operative regional cerebral oxygen saturation is a predictor of postoperative delirium in on-pump cardiac surgery patients: a prospective observational trial. *Critical Care*. 2011;15(5):R218-R218.
34. Finsterer U, Luhr HG, Wirth AE. Effects of acute hypercapnia and hypocapnia on plasma and red cell potassium, blood lactate and base excess in man during anesthesia. *Acta anaesthesiologica Scandinavica*. 1978;22(4):353-366.
35. Adroge HJ, Madias NE. Changes in plasma potassium concentration during acute acid-base disturbances. *The American journal of medicine*. 1981;71(3):456-467.

- 1  
2  
3 36. Natalini G, Seramondi V, Fassini P, et al. Acute respiratory acidosis does not increase  
4 plasma potassium in normokalaemic anaesthetized patients. A controlled randomised  
5 trial. *European Journal of Anaesthesiology*. 2006;18(6):394-400.  
6  
7  
8 37. MacLeod DB, Ikeda K, Vacchiano C, Lobbestael A, Wahr JA, Shaw AD.  
9 Development and validation of a cerebral oximeter capable of absolute accuracy.  
10 *Journal of cardiothoracic and vascular anesthesia*. 2012;26(6):1007-1014.  
11  
12 38. Watzman HM, Kurth CD, Montenegro LM, Rome J, Steven JM, Nicolson SC.  
13 Arterial and venous contributions to near-infrared cerebral oximetry. *Anesthesiology*.  
14 2000;93(4):947-953.  
15  
16 39. Brady K, Joshi B, Zweifel C, et al. Real-time continuous monitoring of cerebral blood  
17 flow autoregulation using near-infrared spectroscopy in patients undergoing  
18 cardiopulmonary bypass. *Stroke*. 2010;41(9):1951-1956.  
19  
20 40. Davie SN, Grocott HP. Impact of extracranial contamination on regional cerebral  
21 oxygen saturation: a comparison of three cerebral oximetry technologies.  
22 *Anesthesiology*. 2012;116(4):834-840.  
23  
24 41. Akça O, Sessler DI, DeLong D, Keijner R, Ganzel B, Doufas AG. Tissue  
25 Oxygenation Response to Mild Hypercapnia during Cardiopulmonary Bypass with  
26 Constant Pump Output. *British journal of anaesthesia*. 2006;96(6):708-714.  
27  
28  
29  
30  
31  
32  
33  
34  
35  
36  
37  
38  
39  
40  
41  
42  
43  
44  
45  
46  
47  
48  
49  
50  
51  
52  
53  
54  
55  
56  
57  
58  
59  
60

## Tables and Figures

**Table 1.** Baseline patient characteristics and surgical characteristics.<sup>a</sup>

|                                        | <b>TMH group<sup>b</sup></b><br><b>(n=20)</b> | <b>TN group<sup>b</sup></b><br><b>(n=20)</b> |                    |
|----------------------------------------|-----------------------------------------------|----------------------------------------------|--------------------|
| <b><u>Patient characteristics</u></b>  |                                               |                                              |                    |
| Gender (Male : Female)                 | 11:9                                          | 12:8                                         |                    |
| Age (years) <sup>a</sup>               | 63.7 [32 to 81]                               | 65.4 [31 to 81]                              |                    |
| Weight (kg)                            | 83.7 [56.8 to 110.6]                          | 81.2 [67.9 to 94.5]                          |                    |
| BMI (kg m <sup>-2</sup> ) <sup>c</sup> | 33.6 [20.7 to 46.5]                           | 32.8 [26.8 to 38.8]                          |                    |
| ASA Status <sup>d</sup>                |                                               |                                              |                    |
| 1                                      | 3 (16.7)                                      | 2 (10.0)                                     |                    |
| 2                                      | 6 (33.3)                                      | 4 (20.0)                                     |                    |
| 3                                      | 7 (38.9)                                      | 10 (50.0)                                    |                    |
| 4                                      | 2 (11.1)                                      | 4 (20.0)                                     |                    |
| Diabetes                               | 4 (22.2)                                      | 5 (25.0)                                     |                    |
| COPD <sup>e</sup>                      | 5 (27.8)                                      | 0 (0.0)                                      |                    |
| Malignancy                             | 11 (61.1)                                     | 7 (35.0)                                     |                    |
| Other co-morbidities                   | 11 (61.1)                                     | 16 (80.0)                                    |                    |
| <b><u>Surgical Characteristics</u></b> |                                               |                                              |                    |
| Duration of surgery (mins)             | 219.0 [123.8 to 303.8]                        | 144.0 [107.8 to 218.2]                       | ( <i>P</i> =0.121) |
| Left baseline oximetry (%)             | 68.7 [63.9 to 72.2]                           | 63.4 [57.3 to 69.6]                          | ( <i>P</i> =0.233) |
| Right baseline oximetry (%)            | 67.9 [64.6 to 70.3]                           | 64.0 [59.4 to 69.0]                          | ( <i>P</i> =0.286) |
| O <sub>2</sub> Sats (%) <sup>f</sup>   | 98.5 [98.1 to 99.0]                           | 98.5 [97.9 to 99.0]                          | ( <i>P</i> =0.834) |
| LOS (days) <sup>g</sup>                | 5 [2.0 to 12.0]                               | 5 [1.8 to 11.5]                              | ( <i>P</i> =0.988) |
| Type of surgery                        |                                               |                                              |                    |
| colorectal                             | 2 (11.1)                                      | 1 (5.0)                                      |                    |
| endocrine                              | 2 (11.1)                                      | 2 (10.0)                                     |                    |
| ear nose & throat                      | 0 (0.0)                                       | 1 (5.0)                                      |                    |
| hepatobiliary                          | 6 (33.3)                                      | 9 (45.0)                                     |                    |
| neurosurgery <sup>h</sup>              | 1 (5.6)                                       | 1 (5.0)                                      |                    |
| orthopedic                             | 2 (11.1)                                      | 1 (5.0)                                      |                    |

|                       |          |          |
|-----------------------|----------|----------|
| thoracic <sup>i</sup> | 4 (22.2) | 1 (5.0)  |
| urology               | 1 (5.6)  | 3 (15.0) |
| vascular              | 0 (0.0)  | 1 (5.0)  |

<sup>a</sup> data reported as number (%) or median [inter-quartile range], except for age, which is reported as median [range]

<sup>b</sup> TMH: targeted mild hypercapnia, TN: targeted normocapnia

<sup>c</sup> BMI: body mass index

<sup>d</sup> ASA: American Society of Anesthesiologists

<sup>e</sup> COPD: chronic obstructive pulmonary disease

<sup>f</sup> O<sub>2</sub> Sats: peripheral oxygen saturation measured by pulse oximetry

<sup>g</sup> LOS: length of hospital stay

<sup>h</sup> includes non-intracranial procedures, e.g. complex spinal surgery

<sup>i</sup> includes procedures not requiring one lung ventilation, e.g. mediastinoscopy with nodal dissection



**Table 2.** Percentage change in cerebral oximetry (% $\Delta$ rSO<sub>2</sub>) from baseline.<sup>a</sup>

| Time from start of surgery (mins) |                  | 15                 | 30                 | 45                  | 60                  | 75                  | 90                  | 105                 | 120                 |
|-----------------------------------|------------------|--------------------|--------------------|---------------------|---------------------|---------------------|---------------------|---------------------|---------------------|
| Left                              | TMH <sup>b</sup> | 0.8 (12.9)<br>{15} | 5.8 (12.3)<br>{15} | 9.0 (15.9)<br>{15}  | 7.0 (14.6)<br>{15}  | 8.5 (15.4)<br>{14}  | 7.3 (14.7)<br>{13}  | 7.7 (17.4)<br>{13}  | 8.1 (14.8)<br>{13}  |
|                                   | TN <sup>b</sup>  | 4.7 (10.5)<br>{18} | 3.2 (15.4)<br>{18} | -1.9 (14.1)<br>{17} | -5.6 (12.7)<br>{17} | -5.3 (15.2)<br>{17} | -5.5 (15.8)<br>{17} | -6.0 (15.2)<br>{17} | -3.6 (15.8)<br>{14} |
| Right                             | TMH              | 6.0 (12.9)<br>{17} | 9.8 (13.2)<br>{17} | 10.4 (18.1)<br>{17} | 11.1 (17.4)<br>{17} | 13.0 (16.4)<br>{16} | 15.6 (17.3)<br>{15} | 14.4 (17.5)<br>{14} | 14.1 (13.6)<br>{14} |
|                                   | TN               | 5.2 (12.6)<br>{20} | 3.9 (11.7)<br>{20} | -3.3 (13.2)<br>{19} | -5.2 (12.1)<br>{19} | -5.4 (12.3)<br>{19} | -4.7 (14.1)<br>{19} | -3.8 (13.7)<br>{18} | -1.3 (13.9)<br>{15} |

| Time from start of surgery (mins) |     | 120                 | 240                 | 360                 | 480                | 600                | 720             | Mean % difference from start to completion of surgery | 95% confidence interval | P value (treatment) |
|-----------------------------------|-----|---------------------|---------------------|---------------------|--------------------|--------------------|-----------------|-------------------------------------------------------|-------------------------|---------------------|
| Left                              | TMH | 8.1 (14.8)<br>{13}  | 6.8 (20.6)<br>{7}   | 6.4 (32.5)<br>{4}   | -8.6 (21.1)<br>{3} | -6.1 (14.1)<br>{3} | 6.9 (NA)<br>{1} | 19.0                                                  | 9.2 -28.8               | <0.001              |
|                                   | TN  | -3.6 (15.8)<br>{14} | -10.4 (39.5)<br>{5} | -43.4 (34.9)<br>{2} | -27.8 (NA)<br>{1}  |                    |                 |                                                       |                         |                     |
| Right                             | TMH | 14.1 (13.6)<br>{14} | 18.4 (23.5)<br>{8}  | 16.8 (36.8)<br>{4}  | 1.5 (14.9)<br>{3}  | 3.0 (8.7)<br>{3}   | 2.0 (NA)<br>{1} | 19.0                                                  | 10.9- 27.0              | <0.001              |
|                                   | TN  | -1.3 (13.9)<br>{15} | -5.3 (32.6)<br>{5}  | -35.4 (26.9)<br>{2} | -37.8 (NA)<br>{1}  |                    |                 |                                                       |                         |                     |

<sup>a</sup> Data are presented every 15 minutes for the first 2 hours and every 2 hours afterwards, and are reported as mean (standard deviation) {sample size}.

<sup>b</sup> TMH: targeted mild hypercapnia, TN: targeted normocapnia

**Table 3.** Postoperative delirium and opioid doses <sup>a</sup>

|                                            | <b>TMH group<sup>b</sup></b><br><b>(n=20)</b> | <b>TN group<sup>b</sup></b><br><b>(n=20)</b> |                   |
|--------------------------------------------|-----------------------------------------------|----------------------------------------------|-------------------|
| <b>Pre-medication</b>                      |                                               |                                              |                   |
| Number of patients                         | 0 (0)                                         | 2 (10.0)                                     |                   |
| Mean midazolam dose (mg)                   | 0                                             | 1.75                                         |                   |
| <b>Intra-operative opioid<sup>c</sup></b>  |                                               |                                              |                   |
| Total dose (mg) <sup>d</sup>               | 21.67 [13.75 to 32.50]                        | 16.67 [10.00 to 22.50]                       | ( <i>P</i> =0.22) |
| Received i.v. morphine (%)                 | 2 (10)                                        | 1 (5)                                        |                   |
| Received i.v. fentanyl (%)                 | 10 (50)                                       | 14 (70)                                      |                   |
| Received i.v. oxycodone (%)                | 9 (45)                                        | 7 (35)                                       |                   |
| Received i.v. tramadol (%)                 | 4 (20)                                        | 0 (0)                                        |                   |
| Received i.v. clonidine (%)                | 0 (0)                                         | 2 (10)                                       |                   |
| <b>Intrathecal morphine</b>                |                                               |                                              |                   |
| Number of patients                         | 5                                             | 2                                            |                   |
| Mean dose (mcg)                            | 220                                           | 350                                          |                   |
| <b>Blood glucose level</b>                 |                                               |                                              |                   |
| Glucose (mmol L-1)                         | 7.1 [7.0 to 7.1]                              | 6.6 [6.4 to 6.7]                             | ( <i>P</i> =0.33) |
| <b>Pre-op CAM<sup>e</sup></b>              | 0 [0 to 0]                                    | 0 [0 to 0]                                   |                   |
| <b>Post-op CAM<sup>e</sup></b>             | 0 [0 to 0]                                    | 1.5 [0 to 3]                                 |                   |
| <b>Presence of post-operative delirium</b> | 0 (0.0)                                       | 6 (30.0)                                     | ( <i>P</i> =0.02) |

<sup>a</sup> Data reported as median [inter-quartile range] or number (%)

<sup>b</sup> TMH: targeted mild hypercapnia, TN: targeted normocapnia

<sup>c</sup> Note some patients received 2 or more different opioids

<sup>d</sup> Total dose normalised to i.v. morphine equivalent

<sup>e</sup> CAM: Confusion Assessment Method

**Table 4.** Average arterial blood gas values <sup>a</sup>

|                                            | TMH group <sup>b</sup><br>(n=20) | TN group <sup>b</sup><br>(n=20) | P-value |
|--------------------------------------------|----------------------------------|---------------------------------|---------|
| pH                                         | 7.31 [7.27 to 7.33]              | 7.46 [7.43 to 7.47]             | <0.001  |
| PaO <sub>2</sub> (mmHg) <sup>c</sup>       | 156.8 [146.3 to 217.2]           | 142.5 [122.5 to 199.1]          | 0.380   |
| PaCO <sub>2</sub> (mmHg) <sup>d</sup>      | 51.50 [46.88 to 60.88]           | 34.75 [32.75 to 38.12]          | <0.001  |
| Bicarbonate (mEq L <sup>-1</sup> )         | 25.00 [24.00 to 27.75]           | 24.00 [22.00 to 24.62]          | 0.020   |
| Base excess (mmol L <sup>-1</sup> )        | -1.00 [-2.50 to 0.25]            | 1.00 [-0.88 to 2.00]            | 0.069   |
| Potassium (mEq L <sup>-1</sup> )           | 3.98 [3.73 to 4.38]              | 4.03 [3.58 to 4.31]             | 0.759   |
| Total Hb (g L <sup>-1</sup> ) <sup>e</sup> | 130.50 [118.12 to 140.62]        | 122.25 [106.88 to 131.25]       | 0.132   |

<sup>a</sup> Data reported as median [inter-quartile range] or number (%)

<sup>b</sup> TMH: targeted mild hypercapnia, TN: targeted normocapnia

<sup>c</sup> PaO<sub>2</sub>: partial pressure of oxygen in arterial blood

<sup>d</sup> PaCO<sub>2</sub>: partial pressure of carbon dioxide in arterial blood

<sup>e</sup> Hb: haemoglobin concentration

**Figure 1.** CONSORT flow diagram

(Please refer to the attached diagram)

**Figure 2.** Percentage change in cerebral oximetry from baseline (%ΔrSO<sub>2</sub>) over time

(Please refer to the attached diagram)

## Captions

Figure 1:

The progress of all participants through the trial displayed by the Consolidated Standards Of Reporting Trials (CONSORT) flow diagram.

Figure 2:

The solid lines represent mean percentage change, the shaded areas represent standard deviation, red represents the targeted mild hypercapnia (TMH) group, and blue represents the targeted normocapnia (TN) group.

Left: average percentage change of regional cerebral oxygen saturation from baseline on the left hemisphere

Right: average percentage change of regional cerebral oxygen saturation from baseline on the right hemisphere

## Tables

**Table 1.** Baseline patient characteristics and surgical characteristics.<sup>a</sup>

|                                        | TMH group <sup>b</sup><br>(n=20) | TN group <sup>b</sup><br>(n=20) |           |
|----------------------------------------|----------------------------------|---------------------------------|-----------|
| <b>Patient characteristics</b>         |                                  |                                 |           |
| Gender (Male : Female)                 | 11:9                             | 12:8                            |           |
| Age (years) <sup>a</sup>               | 63.7 [32 to 81]                  | 65.4 [31 to 81]                 |           |
| Weight (kg)                            | 83.7 [56.8 to 110.6]             | 81.2 [67.9 to 94.5]             |           |
| BMI (kg m <sup>-2</sup> ) <sup>c</sup> | 33.6 [20.7 to 46.5]              | 32.8 [26.8 to 38.8]             |           |
| ASA Status <sup>d</sup>                |                                  |                                 |           |
| 1                                      | 3 (16.7)                         | 2 (10.0)                        |           |
| 2                                      | 6 (33.3)                         | 4 (20.0)                        |           |
| 3                                      | 7 (38.9)                         | 10 (50.0)                       |           |
| 4                                      | 2 (11.1)                         | 4 (20.0)                        |           |
| Diabetes                               | 4 (22.2)                         | 5 (25.0)                        |           |
| COPD <sup>e</sup>                      | 5 (27.8)                         | 0 (0.0)                         |           |
| Malignancy                             | 11 (61.1)                        | 7 (35.0)                        |           |
| Other co-morbidities                   | 11 (61.1)                        | 16 (80.0)                       |           |
| <b>Surgical Characteristics</b>        |                                  |                                 |           |
| Duration of surgery (mins)             | 219.0 [123.8 to 303.8]           | 144.0 [107.8 to 218.2]          | (P=0.121) |
| Left baseline oximetry (%)             | 68.7 [63.9 to 72.2]              | 63.4 [57.3 to 69.6]             | (P=0.233) |
| Right baseline oximetry (%)            | 67.9 [64.6 to 70.3]              | 64.0 [59.4 to 69.0]             | (P=0.286) |
| O <sub>2</sub> Sats (%) <sup>f</sup>   | 98.5 [98.1 to 99.0]              | 98.5 [97.9 to 99.0]             | (P=0.834) |

|                           |                 |                 |                    |
|---------------------------|-----------------|-----------------|--------------------|
| LOS (days) <sup>g</sup>   | 5 [2.0 to 12.0] | 5 [1.8 to 11.5] | ( <i>P</i> =0.988) |
| Type of surgery           |                 |                 |                    |
| colorectal                | 2 (11.1)        | 1 (5.0)         |                    |
| endocrine                 | 2 (11.1)        | 2 (10.0)        |                    |
| ear nose & throat         | 0 (0.0)         | 1 (5.0)         |                    |
| hepatobiliary             | 6 (33.3)        | 9 (45.0)        |                    |
| neurosurgery <sup>h</sup> | 1 (5.6)         | 1 (5.0)         |                    |
| orthopedic                | 2 (11.1)        | 1 (5.0)         |                    |
| thoracic <sup>i</sup>     | 4 (22.2)        | 1 (5.0)         |                    |
| urology                   | 1 (5.6)         | 3 (15.0)        |                    |
| vascular                  | 0 (0.0)         | 1 (5.0)         |                    |

<sup>a</sup> data reported as number (%) or median [inter-quartile range], except for age, which is reported as median [range]

<sup>b</sup> TMH: targeted mild hypercapnia, TN: targeted normocapnia

<sup>c</sup> BMI: body mass index

<sup>d</sup> ASA: American Society of Anesthesiologists

<sup>e</sup> COPD: chronic obstructive pulmonary disease

<sup>f</sup> O<sub>2</sub> Sats: peripheral oxygen saturation measured by pulse oximetry

<sup>g</sup> LOS: length of hospital stay

<sup>h</sup> includes non-intracranial procedures, e.g. complex spinal surgery

<sup>i</sup> includes procedures not requiring one lung ventilation, e.g. mediastinoscopy with nodal dissection

**Table 2.** Percentage change in cerebral oximetry (% $\Delta$ rSO<sub>2</sub>) from baseline.<sup>a</sup>

| Time from start of surgery (mins) |                  | 15                 | 30                 | 45                  | 60                  | 75                  | 90                  | 105                 | 120                 |
|-----------------------------------|------------------|--------------------|--------------------|---------------------|---------------------|---------------------|---------------------|---------------------|---------------------|
| Left                              | TMH <sup>b</sup> | 0.8 (12.9)<br>{15} | 5.8 (12.3)<br>{15} | 9.0 (15.9)<br>{15}  | 7.0 (14.6)<br>{15}  | 8.5 (15.4)<br>{14}  | 7.3 (14.7)<br>{13}  | 7.7 (17.4)<br>{13}  | 8.1 (14.8)<br>{13}  |
|                                   | TN <sup>b</sup>  | 4.7 (10.5)<br>{18} | 3.2 (15.4)<br>{18} | -1.9 (14.1)<br>{17} | -5.6 (12.7)<br>{17} | -5.3 (15.2)<br>{17} | -5.5 (15.8)<br>{17} | -6.0 (15.2)<br>{17} | -3.6 (15.8)<br>{14} |
| Right                             | TMH              | 6.0 (12.9)<br>{17} | 9.8 (13.2)<br>{17} | 10.4 (18.1)<br>{17} | 11.1 (17.4)<br>{17} | 13.0 (16.4)<br>{16} | 15.6 (17.3)<br>{15} | 14.4 (17.5)<br>{14} | 14.1 (13.6)<br>{14} |
|                                   | TN               | 5.2 (12.6)<br>{20} | 3.9 (11.7)<br>{20} | -3.3 (13.2)<br>{19} | -5.2 (12.1)<br>{19} | -5.4 (12.3)<br>{19} | -4.7 (14.1)<br>{19} | -3.8 (13.7)<br>{18} | -1.3 (13.9)<br>{15} |

| Time from start of surgery (mins) |     | 120                 | 240                 | 360                 | 480                | 600                | 720             | Mean % difference from start to completion of surgery | 95% confidence interval | P value (treatment) |
|-----------------------------------|-----|---------------------|---------------------|---------------------|--------------------|--------------------|-----------------|-------------------------------------------------------|-------------------------|---------------------|
| Left                              | TMH | 8.1 (14.8)<br>{13}  | 6.8 (20.6)<br>{7}   | 6.4 (32.5)<br>{4}   | -8.6 (21.1)<br>{3} | -6.1 (14.1)<br>{3} | 6.9 (NA)<br>{1} | 19.0                                                  | 9.2 -28.8               | <0.001              |
|                                   | TN  | -3.6 (15.8)<br>{14} | -10.4 (39.5)<br>{5} | -43.4 (34.9)<br>{2} | -27.8 (NA)<br>{1}  |                    |                 |                                                       |                         |                     |
| Right                             | TMH | 14.1 (13.6)<br>{14} | 18.4 (23.5)<br>{8}  | 16.8 (36.8)<br>{4}  | 1.5 (14.9)<br>{3}  | 3.0 (8.7)<br>{3}   | 2.0 (NA)<br>{1} | 19.0                                                  | 10.9- 27.0              | <0.001              |
|                                   | TN  | -1.3 (13.9)<br>{15} | -5.3 (32.6)<br>{5}  | -35.4 (26.9)<br>{2} | -37.8 (NA)<br>{1}  |                    |                 |                                                       |                         |                     |

<sup>a</sup> Data are presented every 15 minutes for the first 2 hours and every 2 hours afterwards, and are reported as mean (standard deviation) {sample size}.

<sup>b</sup> TMH: targeted mild hypercapnia, TN: targeted normocapnia

**Table 3.** Postoperative delirium and opioid doses <sup>a</sup>

|                                            | <b>TMH group<sup>b</sup></b><br><b>(n=20)</b> | <b>TN group<sup>b</sup></b><br><b>(n=20)</b> |          |
|--------------------------------------------|-----------------------------------------------|----------------------------------------------|----------|
| <b>Pre-medication</b>                      |                                               |                                              |          |
| Number of patients                         | 0 (0)                                         | 2 (10.0)                                     |          |
| Mean midazolam dose (mg)                   | 0                                             | 1.75                                         |          |
| <b>Intra-operative opioid<sup>c</sup></b>  |                                               |                                              |          |
| Total dose (mg) <sup>d</sup>               | 21.67 [13.75 to 32.50]                        | 16.67 [10.00 to 22.50]                       | (P=0.22) |
| Received i.v. morphine (%)                 | 2 (10)                                        | 1 (5)                                        |          |
| Received i.v. fentanyl (%)                 | 10 (50)                                       | 14 (70)                                      |          |
| Received i.v. oxycodone (%)                | 9 (45)                                        | 7 (35)                                       |          |
| Received i.v. tramadol (%)                 | 4 (20)                                        | 0 (0)                                        |          |
| Received i.v. clonidine (%)                | 0 (0)                                         | 2 (10)                                       |          |
| <b>Intrathecal morphine</b>                |                                               |                                              |          |
| Number of patients                         | 5                                             | 2                                            |          |
| Mean dose (mcg)                            | 220                                           | 350                                          |          |
| <b>Blood glucose level</b>                 |                                               |                                              |          |
| Glucose (mmol L <sup>-1</sup> )            | 7.1 [7.0 to 7.1]                              | 6.6 [6.4 to 6.7]                             | (P=0.33) |
| <b>Pre-op CAM<sup>e</sup></b>              | 0 [0 to 0]                                    | 0 [0 to 0]                                   |          |
| <b>Post-op CAM<sup>e</sup></b>             | 0 [0 to 0]                                    | 1.5 [0 to 3]                                 |          |
| <b>Presence of post-operative delirium</b> | 0 (0.0)                                       | 6 (30.0)                                     | (P=0.02) |

<sup>a</sup> Data reported as median [inter-quartile range] or number (%)

<sup>b</sup> TMH: targeted mild hypercapnia, TN: targeted normocapnia

<sup>c</sup> Note some patients received 2 or more different opioids



1  
2  
3  
4  
5  
6  
7  
8  
9  
10  
11  
12  
13  
14  
15  
16  
17  
18  
19  
20  
21  
22  
23  
24  
25  
26  
27  
28  
29  
30  
31  
32  
33  
34  
35  
36  
37  
38  
39  
40  
41  
42  
43  
44  
45  
46  
47  
48  
49  
50  
51  
52  
53  
54  
55  
56  
57  
58  
59  
60

<sup>d</sup> Total dose normalized to i.v. morphine equivalent

<sup>e</sup> CAM: Confusion Assessment Method

For peer review only

**Table 4.** Average arterial blood gas values <sup>a</sup>

|                                              | <b>TMH group<sup>b</sup></b><br><b>(n=20)</b> | <b>TN group<sup>b</sup></b><br><b>(n=20)</b> | <i>P</i> -value |
|----------------------------------------------|-----------------------------------------------|----------------------------------------------|-----------------|
| pH                                           | 7.31 [7.27 to 7.33]                           | 7.46 [7.43 to 7.47]                          | <0.001          |
| <i>PaO</i> <sub>2</sub> (mmHg) <sup>c</sup>  | 156.8 [146.3 to 217.2]                        | 142.5 [122.5 to 199.1]                       | 0.380           |
| <i>PaCO</i> <sub>2</sub> (mmHg) <sup>d</sup> | 51.50 [46.88 to 60.88]                        | 34.75 [32.75 to 38.12]                       | <0.001          |
| Bicarbonate (mEq L <sup>-1</sup> )           | 25.00 [24.00 to 27.75]                        | 24.00 [22.00 to 24.62]                       | 0.020           |
| Base excess (mmol L <sup>-1</sup> )          | -1.00 [-2.50 to 0.25]                         | 1.00 [-0.88 to 2.00]                         | 0.069           |
| Potassium (mEq L <sup>-1</sup> )             | 3.98 [3.73 to 4.38]                           | 4.03 [3.58 to 4.31]                          | 0.759           |
| Total Hb (g L <sup>-1</sup> ) <sup>e</sup>   | 130.50 [118.12 to 140.62]                     | 122.25 [106.88 to 131.25]                    | 0.132           |

<sup>a</sup> Data reported as median [inter-quartile range] or number (%)

<sup>b</sup> TMH: targeted mild hypercapnia, TN: targeted normocapnia

<sup>c</sup> *PaO*<sub>2</sub>: partial pressure of oxygen in arterial blood

<sup>d</sup> *PaCO*<sub>2</sub>: partial pressure of carbon dioxide in arterial blood

<sup>e</sup> Hb: hemoglobin concentration

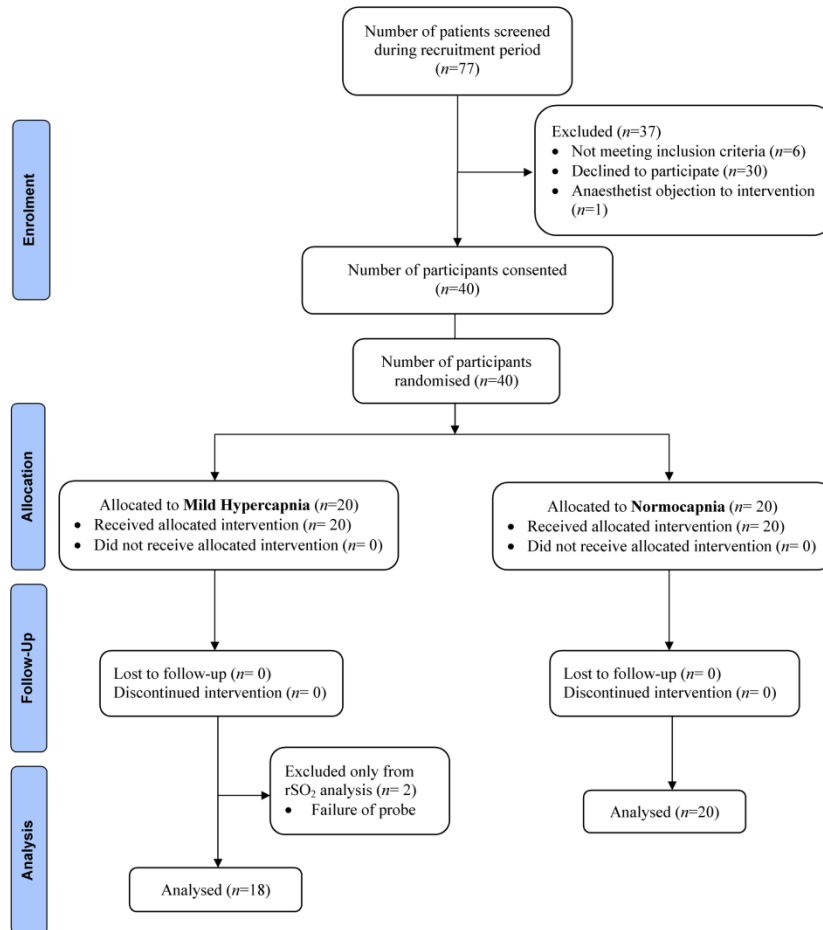

45 The progress of all participants through the trial displayed by the Consolidated Standards Of Reporting Trials  
46 (CONSORT) flow diagram.

47 203x287mm (300 x 300 DPI)

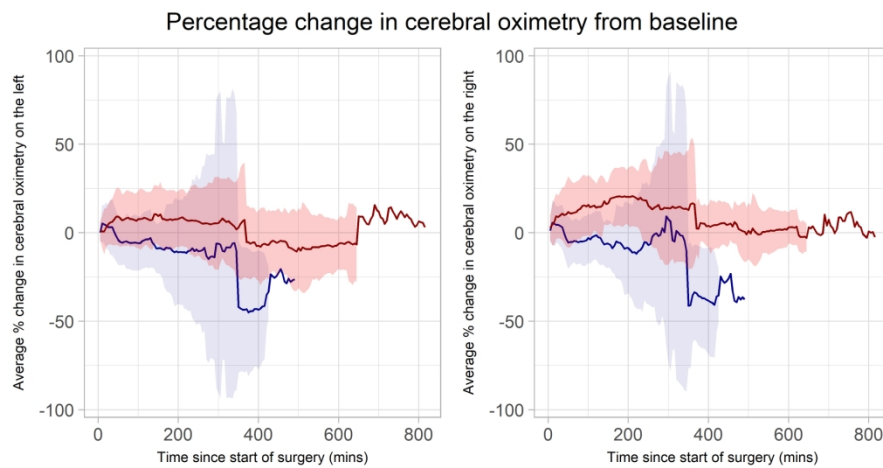

23  
24 The solid lines represent mean percentage change, the shaded areas represent standard deviation, red  
25 represents the targeted mild hypercapnia (TMH) group, and blue represents the targeted normocapnia (TN)  
26 group.

27 Left: average percentage change of regional cerebral oxygen saturation from baseline on the left  
28 hemisphere

29 Right: average percentage change of regional cerebral oxygen saturation from baseline on the right  
30 hemisphere

31  
32 177x93mm (300 x 300 DPI)

## Supplementary File 1

```

#-----
--
# TITLE: Create oximetry database from raw data files
# Author: Clarence Wong
# Last updated: 2/7/2017
# RStudio v. 1.0.136
#-----
--

library(readr)
require(lubridate)
require(TTR)
require(xts)
require(zoo)
library(reshape2)

#-----
--
# Read all data files and save as R object
#-----
--

master<-0
for (i in 1:8)
{
  file <-
read.csv(paste("D:/SS/R_data/FINAL_oximetry_data/",as.character(i),".csv",sep=""))
  master <- rbind(master,file)
}
master$date_time <- paste(master$Date, master$Time..GMT.)
master$date_time <- mdy_hms(master$date_time)
converted_master <- master[,c(58,3:57)]

save(converted_master,file = "converted_master.RData")

database_times <- read_csv("D:/SS/R_data/database_times.csv")
date_vector <- database_times[,c(1,5,6,7,11,12)]

date_vector$start_date_time <- mdy_hms(paste(date_vector$`Date of
surgery`,date_vector$`Monitoring Start`))
date_vector$end_date_time <- mdy_hms(paste(date_vector$`Date of
surgery`,date_vector$`Monitoring End`))

```

```
1
2
3
4 date_vector$surg_start_date_time <- mdy_hms(paste(date_vector`Date of
5 surgery`,date_vector`Start Time`))
6 date_vector$surg_end_date_time <- mdy_hms(paste(date_vector`Date of
7 surgery`,date_vector`Finish Time`))
8
9
10 converted_date_vector <- date_vector[,c(1,7,8,9,10)]
11
12 save(converted_date_vector,file = "converted_date_vector.RData")
13
14 rm(master,date_vector,file)
15
16
17 #-----
18 --
19 # 1. Convert data types and locate monitoring periods
20 # 2. Identify oximetry values at various time points
21 # 3. Compute percentage change from baseline
22 # 4. Identify and locate problematic data
23 #-----
24 --
25
26
27 minutes_taken_as_baseline <- 2.5
28 minutes_interval <- 5
29
30
31 secs_taken_as_baseline <- minutes_taken_as_baseline*60
32 secs_interval <- minutes_interval*60
33
34 load("converted_master.RData")
35 load("converted_date_vector.RData")
36 print("data loaded. check data version")
37
38
39 oximetry_L <-
40 as.numeric(levels(converted_master$RSO2_A1)[converted_master$RSO2_A1])
41 oximetry_R <-
42 as.numeric(levels(converted_master$RSO2_A2)[converted_master$RSO2_A2])
43 PSI <- as.numeric(levels(converted_master$PSI)[converted_master$PSI])
44
45
46 # monitoring duration
47 duration_mins <-
48 difftime(converted_date_vector$end_date_time,converted_date_vector$start_date_time,uni
49 ts = "mins")
50 duration_secs <-
51 difftime(converted_date_vector$end_date_time,converted_date_vector$start_date_time,uni
52 ts = "secs")
53
54
55 locate_start = seq(-1,-1,length.out = dim(converted_date_vector)[1])
56
57
58
59
60
```

```

1
2
3
4
5 for (i in 1:dim(converted_date_vector)[1]){
6   if(length(which(converted_date_vector$start_date_time[i]==converted_master$date_time))
7     ==1)
8     {
9       locate_start[i] <-
10      which(converted_date_vector$start_date_time[i]==converted_master$date_time)
11      }
12    }
13  }
14
15
16  # create final_oximetry data frame
17  final_oximetry <- data.frame()
18  baseline_L_mu<-baseline_L_std<-baseline_L_N<-baseline_R_mu<-baseline_R_std<-
19  baseline_R_N<-rep(9999,dim(converted_date_vector)[1])
20  num_time_pts <- rep(1,40)
21
22
23  for(j in 1:dim(converted_date_vector)[1])
24  {
25    # for each patient
26    if(locate_start[j]==-1)
27    {
28      p_id <- j
29      time_id<-minute_from_baseline<-percentage_total_monitoring_period<-L_delta<-
30      L_mu<-L_sig<-L_N<-R_delta<-R_mu<-R_sig<-R_N<-PSI_mu<-9999
31
32
33    } else{
34
35      locate_baseline <- locate_start[j]+secs_taken_as_baseline/2
36      locate_times <- seq(0,0)
37      num_measurements <- (as.numeric(duration_secs)[j]-
38      secs_taken_as_baseline)%/%secs_interval +1
39      num_time_pts[j] <- num_measurements
40      locate_times[1] <- locate_baseline
41      locate_times[2] <- locate_times[1] + secs_interval/2
42      locate_times[2:num_measurements]<-
43      seq(locate_times[2],locate_start[j]+as.numeric(duration_secs[j])/2,by=secs_interval/2)
44      locate_times[num_measurements+1]<-locate_start[j]+as.numeric(duration_secs[j])/2
45
46
47      baseline_L_mu[j] <- mean(oximetry_L[locate_start[j]:(locate_baseline-1)],na.rm =
48      TRUE)
49      baseline_L_std[j] <- sd(oximetry_L[locate_start[j]:(locate_baseline-1)],na.rm = TRUE)
50      baseline_L_N[j] <- length(oximetry_L[locate_start[j]:(locate_baseline-1)])-
51      sum(is.na(oximetry_L[locate_start[j]:(locate_baseline-1)]))
52
53
54
55
56
57
58
59
60

```

```

1
2
3
4     baseline_R_mu[j] <- mean(oximetry_R[locate_start[j]:(locate_baseline-1)],na.rm =
5 TRUE)
6     baseline_R_std[j] <- sd(oximetry_R[locate_start[j]:(locate_baseline-1)],na.rm = TRUE)
7     baseline_R_N[j] <- length(oximetry_R[locate_start[j]:(locate_baseline-1)])-
8 sum(is.na(oximetry_R[locate_start[j]:(locate_baseline-1)]))
9
10
11     L_delta <- L_mu <- L_sig <- L_N <- R_delta <- R_mu <- R_sig <- R_N <- PSI_mu <-
12 seq(0,0)
13
14     for (k in 1:num_measurements)
15     {
16         L_mu[k] <- mean(oximetry_L[locate_times[k]:(locate_times[k+1]-1)],na.rm = TRUE)
17         L_sig[k] <- sd(oximetry_L[locate_times[k]:(locate_times[k+1]-1)],na.rm = TRUE)
18         L_N[k] <- length(oximetry_L[locate_times[k]:(locate_times[k+1]-1)])-
19 sum(is.na(oximetry_L[locate_times[k]:(locate_times[k+1]-1)]))
20
21         R_mu[k] <- mean(oximetry_R[locate_times[k]:(locate_times[k+1]-1)],na.rm = TRUE)
22         R_sig[k] <- sd(oximetry_R[locate_times[k]:(locate_times[k+1]-1)],na.rm = TRUE)
23         R_N[k] <- length(oximetry_R[locate_times[k]:(locate_times[k+1]-1)])-
24 sum(is.na(oximetry_R[locate_times[k]:(locate_times[k+1]-1)]))
25
26         PSI_mu[k] <- mean(PSI[locate_times[k]:(locate_times[k+1]-1)],na.rm = TRUE)
27     }
28
29     L_delta <- (L_mu/baseline_L_mu[j] - 1)*100
30     R_delta <- (R_mu/baseline_R_mu[j] - 1)*100
31
32     time_id <- 1:num_measurements
33     minute_from_baseline <- c(seq(minutes_interval,minutes_interval*(num_measurements-
34 1), by = minutes_interval),as.numeric(duration_mins[j]-minutes_taken_as_baseline))
35     p_id <- rep(j,num_measurements)
36     percentage_total_monitoring_period <-
37 ((minute_from_baseline*60+secs_taken_as_baseline)/as.numeric(duration_secs[j]))*100
38
39     }
40
41     temp_df <-
42 data.frame(p_id,time_id,minute_from_baseline,percentage_total_monitoring_period,L_delt
43 a,L_mu,L_sig,L_N,R_delta,R_mu,R_sig,R_N,PSI_mu)
44     final_oximetry <- rbind(final_oximetry,temp_df)
45     rm(temp_df)
46
47     }
48
49     missing_L <- unique(final_oximetry$p_id[is.na(final_oximetry$L_delta)])
50
51
52
53
54
55
56
57
58
59
60

```



```

1
2
3
4 missing_R <- unique(final_oximetry$p_id[is.na(final_oximetry$R_delta)])
5 percentage_total_missing_L <-
6 100*(rle(final_oximetry$p_id[is.na(final_oximetry$L_delta)])$lengths) /
7 (num_time_pts[unique(final_oximetry$p_id[is.na(final_oximetry$L_delta)])])
8 percentage_total_missing_R <-
9 100*(rle(final_oximetry$p_id[is.na(final_oximetry$R_delta)])$lengths) /
10 (num_time_pts[unique(final_oximetry$p_id[is.na(final_oximetry$R_delta)])])
11 missing_data <- unique(final_oximetry$p_id[(final_oximetry$L_delta==9999)])
12 missing_data <- missing_data[!is.na(missing_data)]
13 missing_PSI <- unique(final_oximetry$p_id[is.na(final_oximetry$PSI_mu)])
14 percentage_total_missing_PSI <-
15 100*(rle(final_oximetry$p_id[is.na(final_oximetry$PSI_mu)])$lengths) /
16 (num_time_pts[unique(final_oximetry$p_id[is.na(final_oximetry$PSI_mu)])])
17
18
19
20 print("there are missing delta oximetry values in the following patients")
21 print(missing_L)
22 print(percentage_total_missing_L)
23
24
25 print(missing_R)
26 print(percentage_total_missing_R)
27
28
29 print(missing_data)
30
31 print("there are missing PSI values in the following patients")
32 print(missing_PSI)
33 print(percentage_total_missing_PSI)
34
35
36 other_data <-
37 data.frame(num_time_pts,baseline_L_mu,baseline_L_std,baseline_L_N,baseline_R_mu,
38 baseline_R_std,baseline_R_N)
39 other_data[is.na(other_data)]<-9999
40 save(other_data, file="other_data.RData")
41
42 final_oximetry[is.na(final_oximetry)]<-9999
43 save(final_oximetry,file = "final_oximetry.RData")
44
45
46
47 #-----
48 --
49 # 1. Convert baseline characteristic database from wide to long format
50 # 2. Incorporating oximetry data in the database with time as a nested data in the hierarchy
51 # 3. Create final database
52 #-----
53
54 --
55
56
57
58
59

```

```
1
2
3
4 load("final_oximetry.RData")
5 load("other_data.RData")
6 print("check if final oximetry is latest")
7
8
9 baseline_results <- read.csv("D:/SS/R_data/FINAL_oximetry_data/all_baseline.csv",
10 sep=";", stringsAsFactors=FALSE)
11
12 baseline_results$baseline_L_mu <- other_data$baseline_L_mu
13 baseline_results$baseline_L_std <- other_data$baseline_L_std
14 baseline_results$baseline_L_N <- other_data$baseline_L_N
15 baseline_results$baseline_R_mu <- other_data$baseline_R_mu
16 baseline_results$baseline_R_std <- other_data$baseline_R_std
17 baseline_results$baseline_R_N <- other_data$baseline_R_N
18
19
20 baseline_results$P_id <- index(baseline_results)
21
22 baseline_results[baseline_results == "#N/A"]<-9999
23
24
25 #generate baseline_results with the same number of rows as final oximetry
26 baseline_results <- baseline_results[rep(seq_len((40)),num_time_pts),]
27
28
29
30 all_results <- cbind(baseline_results,final_oximetry)
31 if (sum(1*(all_results$P_id != all_results$p_id))==0)
32 {
33   all_results <- all_results[,c(which(colnames(all_results)=="p_id"),1:109,112:122)]
34 }
35
36 save(all_results,file = "all_results.RData")
37
38 #UNCOMMENT TO WRITE CSV
39 #-----
40 write.csv(all_results, file="all_results.csv")
41
42
43
44
45
46
47
48
49
50
51
52
53
54
55
56
57
58
59
```

## Supplementary File 2

```

1
2
3
4
5
6
7
8 #-----
9 -----
10 # TITLE: Create baseline patient and surgical characteristics table, oximetry table, and
11 oximetry graphs
12 # Author: Clarence Wong
13 # Last updated: 2/7/2017
14 # RStudio v. 1.0.136
15 #-----
16 -----
17
18
19 library(readr)
20 require(lubridate)
21 require(TTR)
22 require(xts)
23 require(zoo)
24 require(tableone)
25 require(ggplot2)
26 library(grid)
27 require(gridExtra)
28 require(quantreg)
29
30
31 #-----
32 -----
33
34 # 1. Create summary statistics for baseline characteristics
35 # 2. Perform statistical analysis on secondary outcomes. e.g post-operative delirium
36 # 3. Export tables in csv files
37 # Requires baseline characteristic and baseline oximetry data.
38 #-----
39 -----
40
41
42 baseline_db <- read.csv("D:/SS/R_data/baseline/all_baseline.csv", sep=",",
43 stringsAsFactors=TRUE)
44 load("other_data.RData")
45
46
47 other_data <- other_data[-c(1,2),]
48
49
50 baseline_db$baseline_L_mu <- other_data$baseline_L_mu
51 baseline_db$baseline_L_std <- other_data$baseline_L_std
52 baseline_db$baseline_L_N <- other_data$baseline_L_N
53 baseline_db$baseline_R_mu <- other_data$baseline_R_mu
54 baseline_db$baseline_R_std <- other_data$baseline_R_std
55 baseline_db$baseline_R_N <- other_data$baseline_R_N
56
57
58 baseline_db$P_id <- index(baseline_db)
59
60

```

```

1
2
3
4 baseline_db[baseline_db == "#N/A"]<-NA
5 baseline_db[baseline_db == 9999]<-NA
6 baseline_db$pCO2_2<-
7 as.numeric(levels(baseline_db$pCO2_2))[baseline_db$pCO2_2]
8 baseline_db$BMI<-as.numeric(levels(baseline_db$BMI))[baseline_db$BMI]
9 vars <-
10 c("Gender","Age","Weight","BMI","ASA","Diabetes","COPD","Malignancy","Other_C
11 omorbidities",
12 "Surgery_type","Duration_Surgery_Minutes","baseline_L_mu","baseline_R_mu")
13
14 factorVars <- c("ASA","Diabetes","COPD","Malignancy","Other_Comorbidities")
15 Tableone <- CreateTableOne(vars,"Group",baseline_db,factorVars)
16
17
18
19
20 baseline_db$LOS<-as.numeric(levels(baseline_db$LOS))[baseline_db$LOS]
21 baseline_db$pH_2<-as.numeric(levels(baseline_db$pH_2))[baseline_db$pH_2]
22 baseline_db$HCO3_2<-
23 as.numeric(levels(baseline_db$HCO3_2))[baseline_db$HCO3_2]
24 baseline_db$Base_excess_2<-
25 as.numeric(levels(baseline_db$Base_excess_2))[baseline_db$Base_excess_2]
26 baseline_db$Potassium_2<-
27 as.numeric(levels(baseline_db$Potassium_2))[baseline_db$Potassium_2]
28 baseline_db$Total_Hb_2<-
29 as.numeric(levels(baseline_db$Total_Hb_2))[baseline_db$Total_Hb_2]
30
31
32 baseline_db$pH<-apply(baseline_db[,c("pH_1","pH_2")],1,mean,na.rm=TRUE)
33 baseline_db$pCO2<-
34 apply(baseline_db[,c("pCO2_1","pCO2_2")],1,mean,na.rm=TRUE)
35 baseline_db$HCO3.<-
36 apply(baseline_db[,c("HCO3_1","HCO3_2")],1,mean,na.rm=TRUE)
37 baseline_db$Base_excess<-
38 apply(baseline_db[,c("Base_excess_1","Base_excess_2")],1,mean,na.rm=TRUE)
39 baseline_db$Potassium<-
40 apply(baseline_db[,c("Potassium_1","Potassium_2")],1,mean,na.rm=TRUE)
41 baseline_db$Total_Hb<-
42 apply(baseline_db[,c("Total_Hb_1","Total_Hb_2")],1,mean,na.rm=TRUE)
43
44
45 vars_2 <-
46 c("Surgery_type","Duration_Surgery_Minutes","baseline_L_mu","baseline_R_mu","L
47 OS",
48 "pH","pCO2","HCO3.","Base_excess","Potassium","Total_Hb","post_op_delirium")
49 factorVars_2 <- c("post_op_delirium")
50
51 Tabletwo <- CreateTableOne(vars_2,"Group",baseline_db,factorVars_2,argsExact =
52 "post_op_delirium")
53
54
55
56
57 print(Tabletwo,exact = "post_op_delirium",nonnormal =
58 c("Duration_Surgery_Minutes","baseline_L_mu","baseline_R_mu",
59
60

```

```

1
2
3
4
5 "LOS", "pH", "pCO2", "HCO3.", "Base_excess", "Potassium", "Total_Hb"))
6
7
8

```

```

9 write.csv(print(Tabletwo, exact = "post_op_delirium", nonnormal =
10 c("Duration_Surgery_Minutes", "baseline_L_mu",
11
12 "baseline_R_mu", "LOS", "pH", "pCO2", "HCO3.",
13 "Base_excess", "Potassium", "Total_Hb")),
14 "Table_Two.csv")
15
16

```

```

17 #-----
18 -----
19 # 1. Create summary statistics for percentage change of regional cerebral oxygen
20 saturation
21 # 2. Create plots for regional cerebral oxygen saturation over time
22 # 3. Export oximetry tables in csv files
23 # Requires baseline characteristic and baseline oximetry data.
24 #-----
25 -----
26
27
28 #-----
29 -----
30
31 # Normocapnic group
32

```

```

33 plot_db <- read.csv("D:/SS/R_data/oximetry/MASTER_results_deleted_missing.csv",
34 sep=";", stringsAsFactors=TRUE)
35

```

```

36 plot_db[plot_db == "#N/A"] <- NA
37 plot_db[plot_db == 9999] <- NA
38

```

```

39
40 normocapnia <- subset(plot_db, Group %in% 0)
41 hypercapnia <- subset(plot_db, Group %in% 1)
42

```

```

43 normo_plot <- ggplot(normocapnia, aes(x=minute_from_baseline, y=L_delta,
44 group=p_id)) + geom_line() + geom_point()+
45 ggtitle("normocapnia: L delta")+ xlab("Time since start of operation (mins)")+
46 ylab("% change in oximetry from baseline")
47

```

```

48
49 hyper_plot <- ggplot(hypercapnia, aes(x=minute_from_baseline, y=L_delta,
50 group=p_id)) + geom_line() + geom_point()+
51 ggtitle("hypercapnia: L delta")+ xlab("Time since start of operation (mins)")+ ylab("%
52 change in oximetry from baseline")
53

```

```

54
55 means <- tapply(normocapnia$L_delta, normocapnia$time_id, function(x) mean(x, na.rm
56 = TRUE))
57 stdevs <- tapply(normocapnia$L_delta, normocapnia$time_id, function(x) sd(x, na.rm =
58 TRUE))
59
60

```

```
1
2
3
4 N <- tapply(normocapnia$L_delta,normocapnia$time_id,function(x)
5 length(x[!is.na(x)]))
6
7
8 normo_df_L <- data.frame(means,stdevs)
9 times<- index(normo_df_L)*5
10 normo_df_L <- data.frame(means,stdevs,N, times)
11 total_normo_L <- ggplot(normo_df_L, aes(x=times, y=means)) +
12 geom_line(colour="blue4") +
13   geom_ribbon(normo_df_L,mapping = aes(x=times,
14 ymax=means+stdevs,ymin=means-stdevs),fill="blue4",alpha=0.1)
15
16
17 means <- tapply(normocapnia$R_delta,normocapnia$time_id,function(x) mean(x,
18 na.rm = TRUE))
19 stdevs <- tapply(normocapnia$R_delta,normocapnia$time_id,function(x) sd(x, na.rm =
20 TRUE))
21 N <- tapply(normocapnia$R_delta,normocapnia$time_id,function(x)
22 length(x[!is.na(x)]))
23
24
25 normo_df_R <- data.frame(means,stdevs)
26 times<- index(normo_df_R)*5
27 normo_df_R <- data.frame(means,stdevs,N, times)
28 total_normo_R <- ggplot(normo_df_R, aes(x=times, y=means)) +
29 geom_line(colour="blue4") +
30   geom_ribbon(normo_df_R,mapping = aes(x=times,
31 ymax=means+stdevs,ymin=means-stdevs),fill="blue4",alpha=0.1)
32
33
34 #-----
35 -----
36 # Hypercapnic group
37
38
39 means <- tapply(hypercapnia$L_delta,hypercapnia$time_id,function(x) mean(x, na.rm
40 = TRUE))
41 stdevs <- tapply(hypercapnia$L_delta,hypercapnia$time_id,function(x) sd(x, na.rm =
42 TRUE))
43 N <- tapply(hypercapnia$L_delta,hypercapnia$time_id,function(x) length(x[!is.na(x)]))
44
45
46 hyper_df_L <- data.frame(means,stdevs)
47 times<- index(hyper_df_L)*5
48 hyper_df_L <- data.frame(means,stdevs,N, times)
49 total_hyper_L <- ggplot(hyper_df_L, aes(x=times, y=means))
50
51
52 means <- tapply(hypercapnia$R_delta,hypercapnia$time_id,function(x) mean(x, na.rm
53 = TRUE))
54 stdevs <- tapply(hypercapnia$R_delta,hypercapnia$time_id,function(x) sd(x, na.rm =
55 TRUE))
56 N <- tapply(hypercapnia$R_delta,hypercapnia$time_id,function(x) length(x[!is.na(x)]))
57
58
59 hyper_df_R <- data.frame(means,stdevs)
60
```

```

1
2
3
4 times<- index(hyper_df_R)*5
5 hyper_df_R <- data.frame(means,stdevs,N, times)
6 total_hyper_R <- ggplot(hyper_df_R, aes(x=times, y=means))
7
8
9 total_L <- total_normo_L +
10   geom_ribbon(hyper_df_L,mapping = aes(x=times, ymax=means+stdevs,ymin=means-
11   stdevs),fill="red2",alpha=0.2) +
12   geom_line(hyper_df_L,mapping = aes(x=times, y=means),colour="red4") +
13   theme_light() +
14   xlab("Time since start of surgery (mins)")+ ylab("Average % change in cerebral
15   oximetry on the left") +
16   theme(axis.title.y = element_text(size = rel(0.65), angle = 90)) +
17   theme(axis.title.x = element_text(size = rel(0.65), angle = 00))
18
19
20 total_R <- total_normo_R +
21   geom_ribbon(hyper_df_R,mapping = aes(x=times, ymax=means+stdevs,ymin=means-
22   stdevs),fill="red2",alpha=0.2) +
23   geom_line(hyper_df_R,mapping = aes(x=times, y=means),colour="red4")+
24   theme_light() +
25   xlab("Time since start of surgery (mins)")+ ylab("Average % change in cerebral
26   oximetry on the right") +
27   scale_color_manual(values=c("red4","blue4"))+
28   theme(axis.title.y = element_text(size = rel(0.65), angle = 90)) +
29   theme(axis.title.x = element_text(size = rel(0.65), angle = 00))
30
31
32
33 #tiff('oximetry_graph_high_res.tiff', units="in", width=7, height=3.6667, res=600,
34   compression = 'lzw')
35
36
37 grid.arrange(total_L, total_R, ncol = 2, top=textGrob("Percentage change in cerebral
38   oximetry from baseline",
39   gp=gpar(fontsize=11,fontfamily="Times")),
40   vp=viewport(width=0.9, height=0.9))
41
42 #insert ggplot code
43 #dev.off()
44
45 temp_hyper_L <- t(paste(round(hyper_df_L$mean,1)," (",
46   round(hyper_df_L$stdev,1),")", " {" , hyper_df_L$N,"} ", sep = ""))
47 temp_normo_L <- t(paste(round(normo_df_L$mean,1)," (",
48   round(normo_df_L$stdev,1),")", " {" , normo_df_L$N,"} ", sep = ""))
49
50
51 temp_hyper_R <- t(paste(round(hyper_df_R$mean,1)," (",
52   round(hyper_df_R$stdev,1),")", " {" , hyper_df_R$N,"} ", sep = ""))
53 temp_normo_R <- t(paste(round(normo_df_R$mean,1)," (",
54   round(normo_df_R$stdev,1),")", " {" , normo_df_R$N,"} ", sep = ""))
55
56
57 write.csv( temp_normo_L , "normo_df_L.csv")
58 write.csv( temp_normo_R , "normo_df_R.csv")
59
60

```

```
1  
2  
3  
4 write.csv( temp_hyper_L , "hyper_df_L.csv")  
5 write.csv( temp_hyper_R , "hyper_df_R.csv")  
6  
7  
8  
9  
10  
11  
12  
13  
14  
15  
16  
17  
18  
19  
20  
21  
22  
23  
24  
25  
26  
27  
28  
29  
30  
31  
32  
33  
34  
35  
36  
37  
38  
39  
40  
41  
42  
43  
44  
45  
46  
47  
48  
49  
50  
51  
52  
53  
54  
55  
56  
57  
58  
59  
60
```

For peer review only



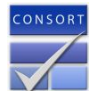

## CONSORT 2010 checklist of information to include when reporting a randomised trial\*

| Section/Topic                    | Item No | Checklist item                                                                                                                                                                              | Reported on page No |
|----------------------------------|---------|---------------------------------------------------------------------------------------------------------------------------------------------------------------------------------------------|---------------------|
| <b>Title and abstract</b>        |         |                                                                                                                                                                                             |                     |
|                                  | 1a      | Identification as a randomised trial in the title                                                                                                                                           | 1                   |
|                                  | 1b      | Structured summary of trial design, methods, results, and conclusions (for specific guidance see CONSORT for abstracts)                                                                     | 2                   |
| <b>Introduction</b>              |         |                                                                                                                                                                                             |                     |
| Background and objectives        | 2a      | Scientific background and explanation of rationale                                                                                                                                          | 4                   |
|                                  | 2b      | Specific objectives or hypotheses                                                                                                                                                           | 4                   |
| <b>Methods</b>                   |         |                                                                                                                                                                                             |                     |
| Trial design                     | 3a      | Description of trial design (such as parallel, factorial) including allocation ratio                                                                                                        | 5                   |
|                                  | 3b      | Important changes to methods after trial commencement (such as eligibility criteria), with reasons                                                                                          | N/A                 |
| Participants                     | 4a      | Eligibility criteria for participants                                                                                                                                                       | 5                   |
|                                  | 4b      | Settings and locations where the data were collected                                                                                                                                        | 5                   |
| Interventions                    | 5       | The interventions for each group with sufficient details to allow replication, including how and when they were actually administered                                                       | 5-7                 |
| Outcomes                         | 6a      | Completely defined pre-specified primary and secondary outcome measures, including how and when they were assessed                                                                          | 6-7                 |
|                                  | 6b      | Any changes to trial outcomes after the trial commenced, with reasons                                                                                                                       | N/A                 |
| Sample size                      | 7a      | How sample size was determined                                                                                                                                                              | 8                   |
|                                  | 7b      | When applicable, explanation of any interim analyses and stopping guidelines                                                                                                                | N/A                 |
| <b>Randomisation:</b>            |         |                                                                                                                                                                                             |                     |
| Sequence generation              | 8a      | Method used to generate the random allocation sequence                                                                                                                                      | 5                   |
|                                  | 8b      | Type of randomisation; details of any restriction (such as blocking and block size)                                                                                                         | 5                   |
| Allocation concealment mechanism | 9       | Mechanism used to implement the random allocation sequence (such as sequentially numbered containers), describing any steps taken to conceal the sequence until interventions were assigned | 5                   |
| Implementation                   | 10      | Who generated the random allocation sequence, who enrolled participants, and who assigned participants to interventions                                                                     | 5-6                 |
| Blinding                         | 11a     | If done, who was blinded after assignment to interventions (for example, participants, care providers, those                                                                                | 5-6                 |

|                                                      |     |                                                                                                                                                   |       |
|------------------------------------------------------|-----|---------------------------------------------------------------------------------------------------------------------------------------------------|-------|
|                                                      |     | assessing outcomes) and how                                                                                                                       |       |
|                                                      | 11b | If relevant, description of the similarity of interventions                                                                                       | 7     |
| Statistical methods                                  | 12a | Statistical methods used to compare groups for primary and secondary outcomes                                                                     | 8-9   |
|                                                      | 12b | Methods for additional analyses, such as subgroup analyses and adjusted analyses                                                                  | 8-9   |
| <b>Results</b>                                       |     |                                                                                                                                                   |       |
| Participant flow (a diagram is strongly recommended) | 13a | For each group, the numbers of participants who were randomly assigned, received intended treatment, and were analysed for the primary outcome    | 10    |
|                                                      | 13b | For each group, losses and exclusions after randomisation, together with reasons                                                                  | 10    |
| Recruitment                                          | 14a | Dates defining the periods of recruitment and follow-up                                                                                           | 5     |
|                                                      | 14b | Why the trial ended or was stopped                                                                                                                | N/A   |
| Baseline data                                        | 15  | A table showing baseline demographic and clinical characteristics for each group                                                                  | 20    |
| Numbers analysed                                     | 16  | For each group, number of participants (denominator) included in each analysis and whether the analysis was by original assigned groups           | 10    |
| Outcomes and estimation                              | 17a | For each primary and secondary outcome, results for each group, and the estimated effect size and its precision (such as 95% confidence interval) | 11    |
|                                                      | 17b | For binary outcomes, presentation of both absolute and relative effect sizes is recommended                                                       | 11    |
| Ancillary analyses                                   | 18  | Results of any other analyses performed, including subgroup analyses and adjusted analyses, distinguishing pre-specified from exploratory         | 11    |
| Harms                                                | 19  | All important harms or unintended effects in each group (for specific guidance see CONSORT for harms)                                             | N/A   |
| <b>Discussion</b>                                    |     |                                                                                                                                                   |       |
| Limitations                                          | 20  | Trial limitations, addressing sources of potential bias, imprecision, and, if relevant, multiplicity of analyses                                  | 13-14 |
| Generalisability                                     | 21  | Generalisability (external validity, applicability) of the trial findings                                                                         | 13-14 |
| Interpretation                                       | 22  | Interpretation consistent with results, balancing benefits and harms, and considering other relevant evidence                                     | 12-13 |
| <b>Other information</b>                             |     |                                                                                                                                                   |       |
| Registration                                         | 23  | Registration number and name of trial registry                                                                                                    | 2     |
| Protocol                                             | 24  | Where the full trial protocol can be accessed, if available                                                                                       | N/A   |
| Funding                                              | 25  | Sources of funding and other support (such as supply of drugs), role of funders                                                                   | 3     |

\*We strongly recommend reading this statement in conjunction with the CONSORT 2010 Explanation and Elaboration for important clarifications on all the items. If relevant, we also recommend reading CONSORT extensions for cluster randomised trials, non-inferiority and equivalence trials, non-pharmacological treatments, herbal interventions, and pragmatic trials. Additional extensions are forthcoming: for those and for up to date references relevant to this checklist, see [www.consort-statement.org](http://www.consort-statement.org).

# BMJ Open

## A randomised controlled trial to investigate the relationship between mild hypercapnia and cerebral oxygen saturation in patients undergoing major surgery

|                                 |                                                                                                                                                                                                                                                                                                                                                                                                                                                                                                                                                                                                                                                                                                                                                                                                      |
|---------------------------------|------------------------------------------------------------------------------------------------------------------------------------------------------------------------------------------------------------------------------------------------------------------------------------------------------------------------------------------------------------------------------------------------------------------------------------------------------------------------------------------------------------------------------------------------------------------------------------------------------------------------------------------------------------------------------------------------------------------------------------------------------------------------------------------------------|
| Journal:                        | <i>BMJ Open</i>                                                                                                                                                                                                                                                                                                                                                                                                                                                                                                                                                                                                                                                                                                                                                                                      |
| Manuscript ID                   | bmjopen-2019-029159.R1                                                                                                                                                                                                                                                                                                                                                                                                                                                                                                                                                                                                                                                                                                                                                                               |
| Article Type:                   | Original research                                                                                                                                                                                                                                                                                                                                                                                                                                                                                                                                                                                                                                                                                                                                                                                    |
| Date Submitted by the Author:   | 03-Sep-2019                                                                                                                                                                                                                                                                                                                                                                                                                                                                                                                                                                                                                                                                                                                                                                                          |
| Complete List of Authors:       | Wong, Clarence; Austin Hospital, Department of Anaesthesia<br>Churilov, Leonid; The Florey Institute of Neuroscience and Mental Health; University of Melbourne<br>Cowie, Dean; Austin Hospital, Department of Anaesthesia<br>Tan, Chong; Austin Hospital, Department of Anaesthesia<br>Hu, Raymond; Austin Hospital, Department of Anaesthesia<br>Tremewen, David; Austin Hospital, Department of Anaesthesia<br>Pearce, Brett; Austin Hospital, Department of Anaesthesia<br>Pillai, Param; Austin Hospital, Department of Anaesthesia<br>Karalipillai, Dharshi; Austin Hospital, Department of Anaesthesia<br>Bellomo, Rinaldo; Austin Hospital, Department of Intensive Care; University of Melbourne<br>Weinberg, Laurence; Austin Hospital, Department of Anaesthesia; University of Melbourne |
| <b>Primary Subject Heading</b>: | Anaesthesia                                                                                                                                                                                                                                                                                                                                                                                                                                                                                                                                                                                                                                                                                                                                                                                          |
| Secondary Subject Heading:      | Evidence based practice, Health informatics                                                                                                                                                                                                                                                                                                                                                                                                                                                                                                                                                                                                                                                                                                                                                          |
| Keywords:                       | hypercapnia, oximetry, Spectroscopy, Near-Infrared, Respiration, Artificial, Delirium                                                                                                                                                                                                                                                                                                                                                                                                                                                                                                                                                                                                                                                                                                                |
|                                 |                                                                                                                                                                                                                                                                                                                                                                                                                                                                                                                                                                                                                                                                                                                                                                                                      |

SCHOLARONE™  
Manuscripts



I, the Submitting Author has the right to grant and does grant on behalf of all authors of the Work (as defined in the below author licence), an exclusive licence and/or a non-exclusive licence for contributions from authors who are: i) UK Crown employees; ii) where BMJ has agreed a CC-BY licence shall apply, and/or iii) in accordance with the terms applicable for US Federal Government officers or employees acting as part of their official duties; on a worldwide, perpetual, irrevocable, royalty-free basis to BMJ Publishing Group Ltd ("BMJ") its licensees and where the relevant Journal is co-owned by BMJ to the co-owners of the Journal, to publish the Work in this journal and any other BMJ products and to exploit all rights, as set out in our [licence](#).

The Submitting Author accepts and understands that any supply made under these terms is made by BMJ to the Submitting Author unless you are acting as an employee on behalf of your employer or a postgraduate student of an affiliated institution which is paying any applicable article publishing charge ("APC") for Open Access articles. Where the Submitting Author wishes to make the Work available on an Open Access basis (and intends to pay the relevant APC), the terms of reuse of such Open Access shall be governed by a Creative Commons licence – details of these licences and which [Creative Commons](#) licence will apply to this Work are set out in our licence referred to above.

Other than as permitted in any relevant BMJ Author's Self Archiving Policies, I confirm this Work has not been accepted for publication elsewhere, is not being considered for publication elsewhere and does not duplicate material already published. I confirm all authors consent to publication of this Work and authorise the granting of this licence.

1  
2  
3  
4  
5 **A randomised controlled trial to investigate the relationship between mild hypercapnia**  
6 **and cerebral oxygen saturation in patients undergoing major surgery**  
7  
8  
9

10 **Authors:** Clarence Wong<sup>1,2</sup>, Leonid Churilov<sup>2,3</sup>, Dean Cowie<sup>1</sup>, Chong Tan<sup>1</sup>, Raymond Hu<sup>1</sup>,  
11 David Tremewen<sup>1</sup>, Brett Pearce<sup>1</sup>, Param Pillai<sup>1</sup>, Dharshi Karalipillai<sup>1</sup>, Rinaldo Bellomo<sup>1,2</sup>,  
12 Laurence Weinberg<sup>1,2</sup>  
13

- 14  
15 1. Department of Anaesthesia, Austin Hospital, Heidelberg, Victoria, Australia;  
16  
17 2. University of Melbourne, Parkville, Victoria, Australia;  
18  
19 3. The Florey Institute of Neuroscience and Mental Health, Heidelberg, Victoria, Australia  
20  
21  
22  
23

24 **Correspondence**

25 A/Prof Laurence Weinberg

26 Department of Anaesthesia, Austin Hospital

27 145 Studley Road, Heidelberg, Victoria 3084, Australia

28 Phone number: (61) 03 94965000

29 Email: [laurence.weinberg@austin.org.au](mailto:laurence.weinberg@austin.org.au)  
30  
31  
32  
33  
34  
35  
36

37 **Word Count**

38 Abstract: 300

39 Introduction: 304

40 Methods: 2017

41 Results: 743

42 Discussion: 1718

43 Conclusion: 91

44 Body text: 4873  
45  
46  
47  
48  
49  
50  
51  
52  
53  
54  
55  
56  
57  
58  
59  
60

## **Abstract**

**Objectives:** The effects of hypercapnia on regional cerebral oxygen saturation (rSO<sub>2</sub>) during surgery are unclear. We conducted a randomised controlled trial to investigate the relationship between mild hypercapnia and rSO<sub>2</sub>. We hypothesized that, compared with targeted normocapnia (TN), targeted mild hypercapnia (TMH) during major surgery would increase rSO<sub>2</sub>.

**Design:** A prospective, randomised controlled trial in adult participants undergoing elective major surgery.

**Setting:** A single tertiary centre in Heidelberg, Victoria, Australia.

**Participants:** 40 participants were randomised to either TMN or TN group (20 to each).

**Interventions:** TMH (partial pressure of carbon dioxide in arterial blood, PaCO<sub>2</sub>, 45-55 mmHg) or TN (PaCO<sub>2</sub> 35-40 mmHg) was delivered via controlled ventilation throughout surgery.

**Primary and secondary outcome measures:** The primary endpoint was the absolute difference between two groups in percentage change in rSO<sub>2</sub> from baseline to completion of surgery. Secondary endpoints included intra-operative pH, bicarbonate concentration, base excess, serum potassium concentration, incidence of postoperative delirium and length of stay (LOS) in hospital.

**Results:** The absolute difference between two groups in percentage change in rSO<sub>2</sub> from baseline to completion of surgery was 19.0% higher in both hemispheres with TMH ( $P<0.001$ ). The difference in % $\Delta$ rSO<sub>2</sub> on both hemispheres between the two groups diverged with time with TMH exhibiting smaller percentage decrease over time compared to TN. Postoperative delirium was higher in the TN group (risk difference 0.3, 95% CI [0.1 to 0.5],  $P=0.02$ ). Length of stay was similar between groups (5 days vs. 5 days;  $P=0.99$ ).

**Conclusions:** TMH was associated with a stable increase in rSO<sub>2</sub> from baseline while TN was associated with a decrease in rSO<sub>2</sub> in both hemispheres in patients undergoing major

1  
2  
3 surgery. This resulted in a clear separation of percentage change in rSO<sub>2</sub> from baseline  
4 between TMH and TN over time. Our findings provide the rationale for larger studies of  
5 TMH during surgery.  
6  
7  
8  
9

10 **Clinical trial registration:** The Australian New Zealand Clinical Trials Registry,  
11 unique identification number: ACTRN12616000320459  
12  
13

14  
15 **Keywords:** Hypercapnia; Oximetry; Spectroscopy, Near-Infrared; Respiration, Artificial;  
16 Delirium  
17  
18  
19  
20  
21  
22  
23  
24  
25  
26  
27  
28  
29  
30  
31  
32  
33  
34  
35  
36  
37  
38  
39  
40  
41  
42  
43  
44  
45  
46  
47  
48  
49  
50  
51  
52  
53  
54  
55  
56  
57  
58  
59  
60

## **Article Summary**

### *Strengths of this study*

- High internal validity due to blinding and random allocation to groups
- Frequent sampling of oximetry data throughout monitoring period
- Non-invasive nature of near-infrared spectroscopy (NIRS) derived regional cerebral oxygen saturation (rSO<sub>2</sub>)

### *Limitations of this study*

- Study findings do not apply to emergency surgeries, intra-cranial surgeries, or surgeries requiring one lung ventilation
- rSO<sub>2</sub> measurements rely on the assumption that rSO<sub>2</sub> is homogenous in the brain

## **Acknowledgement**

### **Funding Statement**

Masimo provided the oximetry sensors used for this trial. This study conception, design, trial management, data collection, data analyses, and the writing of the manuscript, have been executed completely independently of Masimo and any other external organizations. This work was supported by the Department of Anaesthesia Research Fund, Austin Hospital, Heidelberg, Victoria, Australia

### **Declaration of interest**

All authors declare no conflict of interest.

### **Presentation**

Findings of this study were presented as a poster presentation at the PostGraduate Assembly in Anesthesiology, 8-12 December 2018, New York, USA

### **Data sharing statement**

De-identified participant data are available upon reasonable request.



## **Introduction**

In patients undergoing major surgery, the effects of mild hypercapnia on regional cerebral oxygen saturation (rSO<sub>2</sub>) have not been fully examined, and any beneficial or harmful effects of hypercapnia as a therapeutic ventilation strategy to improve cerebral oxygenation are unknown. In animal models, CO<sub>2</sub> is a well-known vasodilator improving cerebral blood flow.<sup>1-3</sup> The neuroprotective mechanisms of mild hypercapnia, whilst not completely understood, have been postulated to be a result of increase in cerebral blood flow, enhancement of oxygen delivery, improvements in cerebral glucose utilisation and oxidative metabolism,<sup>4,5</sup> and activation of ATP-sensitive potassium channels to maintain normal neuronal activity in the setting of ischemia.<sup>6</sup>

The recent emergence of near-infrared spectroscopy (NIRS) based cerebral oximetry has provided a practical method to measure rSO<sub>2</sub> continuously and non-invasively. This technology has gained substantial supportive evidence in resuscitation, critical care, and surgical applications.<sup>7-9</sup> Numerous studies have shown that NIRS can be applied clinically in the resuscitation and cardiac surgery settings where cerebral desaturation events can be both effectively monitored and managed.<sup>10-13</sup> However, whilst absolute and relative saturation thresholds theoretically requiring prompt interventions have been proposed,<sup>14</sup> these thresholds have not been validated and there is a lack of consensus on the indication and timing of interventions. In patients undergoing surgery, rSO<sub>2</sub> was reported to be higher with mild hypercapnia but the intra-operative temporal relationship between rSO<sub>2</sub> and mild hypercapnia remains unclear.<sup>15</sup>

Accordingly, we conducted a randomised controlled trial to test the hypothesis that targeted mild hypercapnia (TMH), defined as partial pressure of carbon dioxide in arterial blood (PaCO<sub>2</sub>) between 45 and 55 mmHg, during elective major surgery would increase cerebral oxygen saturation compared to targeted normocapnia (TN), defined as PaCO<sub>2</sub> between 35 and 40 mmHg. As a secondary aim, we evaluated if TMH would affect the development of postoperative delirium, a commonly reported complication in the immediately peri-operative setting.<sup>16-18</sup>

## **Methods**

### *Ethics approval and clinical trial registration*

The study was approved by the Austin Health Research and Ethics Committee on 6<sup>th</sup> January 2016 (HREC/15/Austin/488) and all participants gave written informed consent. The study was prospectively registered on 10<sup>th</sup> March 2016 with the Australian New Zealand Clinical Trials Registry (ACTRN12616000320459). The study was reported in accordance with the CONSORT Guidelines for reporting randomised trials.<sup>19</sup>

### *Trial design, setting, and population*

Between March 2016 and March 2017, we conducted the randomised controlled trial at the Austin Hospital, a university teaching tertiary metropolitan hospital at Heidelberg, Victoria. Following pre-operative assessment at the anaesthesia pre-admissions clinic and the receipt of written informed consent, eligible patients undergoing elective major surgery were identified. Inclusion criteria included the following: adult patients (age over 18 years), surgery of greater than 2 hours expected duration requiring at least one overnight admission, a clinical indication for continuous blood pressure monitoring via an invasive arterial line, and intermittent positive pressure ventilation via an endotracheal tube as part of standard anaesthesia care. Exclusion criteria included patients undergoing cardiac surgery, procedures requiring one lung isolation, liver transplantation, intracranial surgery, GCS less than 15, known cognitive impairment, intellectual disability or a mental illness, moderate pulmonary hypertension (mean pulmonary arterial pressure greater than 40 mmHg), and American Society of Anesthesiology status V.

### *Randomisation and blinding*

An independent statistician generated a computerised sequence of 40 allocation codes, 20 for each group. A research nurse sealed the allocation codes into sequentially numbered opaque envelopes. Study participants, surgeons, and all peri-operative staff were blinded to treatment allocation. However, it was not possible to blind the attending anaesthetist who was responsible for delivery of the intervention. Immediately after induction of anaesthesia, patients were randomised to either targeted mild hypercapnia (PaCO<sub>2</sub> 45-55 mmHg) or targeted normocapnia (PaCO<sub>2</sub> 35-40 mmHg). The end-tidal carbon dioxide (EtCO<sub>2</sub>) was

1  
2  
3 titrated accordingly in order to achieve the desired intervention but the anaesthetist did not  
4 have a rSO<sub>2</sub> goal to titrate to. Data collection for all the trial outcomes was collected by an  
5 independent researcher blinded to treatment allocation. The sequence was decoded after the  
6 data was analysed. The anaesthetist delivering the intervention did not participate in the  
7 assessment of postoperative delirium.  
8  
9  
10  
11  
12  
13

#### 14 *Outcomes and data collection*

15 The primary endpoint was the absolute difference between the TMH and TN groups in  
16 percentage change in rSO<sub>2</sub> from baseline to completion of surgery. Secondary endpoints  
17 evaluated the effects of mild hypercapnia on the incidence of postoperative delirium, intra-  
18 operative pH, bicarbonate, base excess, serum potassium, and length of hospital stay (LOS).  
19  
20  
21  
22  
23

#### 24 *Measurement of rSO<sub>2</sub>*

25 Regional cerebral oxygen saturation was collected using the Masimo O<sub>3</sub><sup>TM</sup> regional oximetry  
26 component of the Root<sup>TM</sup> Patient Monitor platform (O<sub>3</sub><sup>TM</sup> Masimo, Irvine, CA). This regional  
27 oximetry device uses NIRS and reflectance oximetry to monitor rSO<sub>2</sub> in the brain, capturing  
28 both absolute and trend rSO<sub>2</sub> data. Absolute oximetry data is defined as the regional oxygen  
29 saturation value measured by the oximetry probes calibrated by a fixed ratio between arterial  
30 to venous blood, whereas the trend oximetry data is defined as the change in regional oxygen  
31 saturation value measured by the oximetry probes. The measurement errors for absolute and  
32 trend data are reported to be approximately 4% and 3% respectively when tested against  
33 reference blood samples taken from the radial artery and internal jugular bulb vein.<sup>20</sup> rSO<sub>2</sub>  
34 was measured in the two hemispheres separately. Following manufacturer instructions, two  
35 NIRS sensors were attached to patient's left and right forehead, recording both absolute and  
36 trend data bilaterally. After the recording of baseline cerebral oximetry, only absolute  
37 oximetry data were extracted and analysed. Regional cerebral oxygen saturation was  
38 collected before commencing any premedication and before induction of anaesthesia.  
39 Measurements were recorded every two seconds until the last surgical suture was sited. Data  
40 were exported as comma separated values files after surgery and processed using manually  
41 written R scripts on RStudio v. 1.0.136 (**Supplementary File 1**). Data from the left and right  
42 forehead were analysed separately.  
43  
44  
45  
46  
47  
48  
49  
50  
51  
52  
53  
54  
55  
56  
57  
58  
59  
60

#### *Measurement of delirium*

1  
2  
3 Delirium was assessed using a validated and widely utilized Confusion Assessment Method  
4 (CAM) rating scale, adapted from Inouye *et al.*, immediately on arrival to hospital, then  
5 within 18-24 hours after surgery.<sup>21,22</sup> Diagnosis of delirium requires the presence of both  
6 acute onset with fluctuating course and inattention, together with either disorganised thinking  
7 or altered level of consciousness. A single trained interviewer, blinded to randomisation, and  
8 proficient and trained in the Confusion Assessment Method, conducted all the assessments  
9 pre-operatively when patient arrived at the hospital and at 8am on the next day after surgery  
10 in the ward (within 18-24 hours postoperatively). The baseline cognitive function was not  
11 formally assessed with collateral history from family or carers.  
12  
13  
14  
15  
16  
17  
18  
19

### 20 *Measurement of PaCO<sub>2</sub> and intra-operative adherence to group allocation*

21 Immediately after tracheal intubation with a cuffed endotracheal tube, minute ventilation was  
22 adjusted to achieve an EtCO<sub>2</sub> concentration of 45-55 mmHg in the TMH group or 35-40  
23 mmHg in the TN group. Due to presence of alveolar dead space, EtCO<sub>2</sub> can be lower than  
24 PaCO<sub>2</sub> by up to 5 mmHg. Therefore, an arterial blood gas (ABG) was obtained to check  
25 PaCO<sub>2</sub> and ventilation was further adjusted accordingly to achieve the desired PaCO<sub>2</sub> target  
26 ranges. The PaCO<sub>2</sub>-EtCO<sub>2</sub> gradient was then maintained throughout the surgery, with the  
27 assumption that the PaCO<sub>2</sub> would remain constant. Additional ABG were sampled at the  
28 discretion of the anaesthetist if the gradient required re-evaluation e.g. requirements for  
29 adjustment of ventilation setting. Finally, at completion of surgery, an ABG was sampled to  
30 accurately document the PaCO<sub>2</sub> value, and to assess whether PaCO<sub>2</sub> was being maintained  
31 within target values.  
32  
33  
34  
35  
36  
37  
38  
39  
40  
41  
42

### 43 *Arterial blood gas analysis*

44 All arterial blood gas variables were collected by ABL80 FLEX Blood Gas Analyzer  
45 (Radiometer, Copenhagen, Denmark) with a fully automated micromode eliminating risk of  
46 user-induced bias or loss of accuracy with very small samples, and an interference-protected  
47 lactate analyses. ABG variables include partial pressure of oxygen, partial pressure of carbon  
48 dioxide, pH, bicarbonate concentration, base excess, lactate, haemoglobin concentration (Hb)  
49 and electrolytes such as sodium and potassium ion concentration. The machine calculates the  
50 bicarbonate concentration using the Henderson-Hasselbalch equation and the standard base  
51 excess (SBE) using the Van Slyke equation with the following reference points pH = 7.40,  
52 PaCO<sub>2</sub> = 40mmHg, and temperature = 37°C to determine changes in bicarbonate, protein  
53 anion, and phosphate concentrations, and therefore SBE. Two or more ABG samples were  
54  
55  
56  
57  
58  
59  
60

1  
2  
3 measured intra-operatively as described previously. The mean values of pH, bicarbonate  
4 concentration, base excess, and serum potassium concentration from the first and the last  
5 ABG sample were considered as some of the secondary outcomes for the study. Intra-  
6  
7  
8 operative pH, bicarbonate, and base excess are important variables that inform acid-base  
9 status of a patient, in particular, bicarbonate and base excess are useful when determining the  
10 extent of metabolic contributions or compensation. Potassium concentration is a key  
11 physiological parameter that affects cardiac action potential conduction, and its relevance in  
12 the study is paramount as hyperkalaemia from hypercapnic-induced acidosis is a potential  
13 complication of the intervention. Potential confounders to  $rSO_2$  measurements such as  
14 Haemoglobin concentration and partial pressure of oxygen were recorded. Other variables  
15 such as lactate and sodium concentration were collected for routine clinical care and they  
16 were not considered as part of the outcome measures.  
17  
18  
19  
20  
21  
22  
23  
24  
25

### 26 *Standardisation of care*

27 All patients underwent pre-operative multidisciplinary team assessment including a  
28 haematology led multimodal peri-operative haemoglobin optimisation program based on the  
29 National Blood Authority of Australia's patient blood management initiatives to optimise  
30 pre-operative red cell mass, minimise peri-operative blood loss and tolerate postoperative  
31 anaemia.<sup>23</sup> All participants were fasted two hours for clear fluids and six hours for solids  
32 according to standard hospital fasting protocols. All participants received a general  
33 anaesthetic with propofol for induction, an inhalational agent for maintenance of anaesthesia,  
34 with 50% oxygen to air mixture to maintain oxygen saturations above 97%. Routine  
35 monitoring for all participants included continuous ECG, pulse oximetry, temperature,  
36 bispectral index (BIS) monitoring, and neuromuscular monitoring. Adequate depth of  
37 anaesthesia was ensured by targeting BIS reading between 40 and 60. Conduct of  
38 anaesthesia, including the use of additional invasive monitoring, intra-operative medications,  
39 fluids intervention, and use of vasoactive medications, regional anaesthesia and use of  
40 intraoperative opioids were entirely at the discretion of the attending anaesthetist. In keeping  
41 with hospital protocol, we transfused blood if haemoglobin concentration was less than 75 g  
42  $dL^{-1}$ , or less than 80 g  $dL^{-1}$  in the presence of ongoing bleeding.  
43  
44  
45  
46  
47  
48  
49  
50  
51  
52  
53  
54  
55  
56  
57  
58  
59  
60

### *Sample size calculations*

Based on our institution's pilot data and reported figures, normal rSO<sub>2</sub> values for awake patients could range from 60% to 80%<sup>24</sup>, which we assumed to be the case at the baseline (beginning of surgery). We assumed no change in rSO<sub>2</sub> in the control group and considered an absolute difference between the groups in percentage change in rSO<sub>2</sub> value from the baseline to completion of surgery of 15% to be clinically important. Thus, the absolute changes in rSO<sub>2</sub> from the baseline to the end of surgery were hypothesised to be 0% in control group and 12% (15% percentage change from the baseline of 80% rSO<sub>2</sub>) in the intervention group. Assuming two-tailed threshold for statistical significance of 0.05 and common standard deviation of the absolute change of 10%, the total sample size of 40 patients (equally distributed between two groups) will yield the 0.9 power to observe large treatment effect (Cohen's d=1.1 or higher).

### *Statistical Analyses*

The study was reported in accordance with the Statistical Analyses and Methods in the Published Literature (SAMPL) Guidelines.<sup>25</sup> Statistical analysis was performed using commercial statistical software STATA/IC v.13 with a *P* value of 0.05 to indicate statistical significance. Figures and tables were created by manually written R scripts on RStudio v. 1.0.136 (**Supplementary File 2**). Normality was determined by the Shapiro–Wilk test, further confirmed by manual inspection of the skewness and kurtosis of the data. Parametric continuous data were compared by the Student's *t*-test, and non-parametric continuous data were compared by the Mann-Whitney U test. For normally distributed data, results were presented as mean (standard deviation); and for non-parametric data, results were presented as median [inter-quartile range] unless otherwise stated. Fisher's exact test was used in the analysis of all categorical variables. For the primary outcome we compared the absolute difference between the TMH and TN groups in percentage change in rSO<sub>2</sub> from baseline to completion of surgery using an unpaired, two-tailed *t*-test. A more detailed longitudinal analysis of time-by-treatment interaction was also conducted using a random effect generalised least squares regression model (due to the repeated measures nature of the data) with percentage change in rSO<sub>2</sub> at a given time point throughout the surgery as the output, the treatment group and the time (minutes from start of surgery), as well as the time-by-treatment interaction term as inputs. The duration of surgery varied between different patients and therefore, in order to compare %ΔrSO<sub>2</sub> at different time points across all the patients, the time

1  
2  
3 was measured using “minutes from the start of surgery” metric. For robustness analyses,  
4 similar models adjusted for age, baseline oximetry values, and pre-operative haemoglobin  
5 levels were implemented, as well as models where time was measured not in minutes, but as  
6 a percentage of total surgery duration.  
7  
8  
9

### 10 11 12 *Patient and Public Involvement*

13 The study was designed to investigation the relationship between TMH and rSO<sub>2</sub>, and the  
14 incidence of postoperative delirium was one of the secondary outcomes. As mentioned  
15 previously, postoperative delirium is a commonly reported postoperative complication and it  
16 is linked to functional decline, institutionalisation, and higher mortality.<sup>16,18</sup> Our study  
17 involved minimal invasive monitoring and interventions, thereby causing minimal  
18 inconvenience or physical discomfort to patients. The study implications, however, could  
19 potentially inform standard anaesthesia practice to smoothen patients’ postoperative course of  
20 recovery and minimise length of stay. Patients were involved in the study from the initial pre-  
21 admission consultation appointment where the rationale of the study, potential applications of  
22 the study outcomes, data privacy and management, and potential harmful effects were  
23 explained in detail. Study participants were not directly involved in the design and conduct of  
24 the study. Potential burden of the intervention was not rated by patients themselves, rather,  
25 potential harmful effects were monitored by the attending anaesthetist as part of routine  
26 clinical care. Study results and outcomes, once finalised, will be posted to study participants.  
27  
28  
29  
30  
31  
32  
33  
34  
35  
36  
37  
38  
39  
40  
41  
42  
43  
44  
45  
46  
47  
48  
49  
50  
51  
52  
53  
54  
55  
56  
57  
58  
59  
60

## Results

Seventy-seven participants were screened for eligibility. Thirty-seven patients were excluded because they did not meet the inclusion criteria ( $n=6$ ), declined to participate ( $n=30$ ), or due to anaesthetist objection to intervention ( $n=1$ ). For logistical reasons, recruitment could only be performed when the interviewer conducting the CAM testing was available. The Consort diagram is presented in **Figure 1**. There were no violations or breaches of the study protocol, however two participants in the hypercapnic group had failure of bilateral probe attachment and lead connection problem that were unable to be rescued. These patients were subsequently excluded from the analyses of oxygenation as no  $rSO_2$  data were captured and were included in the analysis of all other variables and endpoints. In the hypercapnic group, three participants had unilateral discontinuous oximetry readings due to intermittent signal dropout. In the normocapnic group, signal dropout occurred in two patients on the left side. The corresponding data were excluded.

The baseline participant characteristics are summarised in **Table 1**.

**Table 1.** Baseline patient characteristics and surgical characteristics.<sup>a</sup>

|                                       | TMH group <sup>b</sup><br>( $n=20$ ) | TN group <sup>b</sup><br>( $n=20$ ) |
|---------------------------------------|--------------------------------------|-------------------------------------|
| <b><u>Patient characteristics</u></b> |                                      |                                     |
| Gender (Male : Female)                | 11:9                                 | 12:8                                |
| Age (years) <sup>a</sup>              | 63.7 [32 to 81]                      | 65.4 [31 to 81]                     |
| Weight (kg)                           | 83.7 [56.8 to 110.6]                 | 81.2 [67.9 to 94.5]                 |
| BMI ( $kg\ m^{-2}$ ) <sup>c</sup>     | 33.6 [20.7 to 46.5]                  | 32.8 [26.8 to 38.8]                 |
| ASA Status <sup>d</sup>               |                                      |                                     |
| 1                                     | 3 (16.7)                             | 2 (10.0)                            |
| 2                                     | 6 (33.3)                             | 4 (20.0)                            |
| 3                                     | 7 (38.9)                             | 10 (50.0)                           |
| 4                                     | 2 (11.1)                             | 4 (20.0)                            |
| Diabetes                              | 4 (22.2)                             | 5 (25.0)                            |
| COPD <sup>e</sup>                     | 5 (27.8)                             | 0 (0.0)                             |



|                                        |                        |                        |                    |
|----------------------------------------|------------------------|------------------------|--------------------|
| Malignancy                             | 11 (61.1)              | 7 (35.0)               |                    |
| Other co-morbidities                   | 11 (61.1)              | 16 (80.0)              |                    |
| <b><u>Surgical Characteristics</u></b> |                        |                        |                    |
| Duration of surgery (mins)             | 219.0 [123.8 to 303.8] | 144.0 [107.8 to 218.2] | ( <i>P</i> =0.121) |
| Left baseline oximetry (%)             | 68.7 [63.9 to 72.2]    | 63.4 [57.3 to 69.6]    | ( <i>P</i> =0.233) |
| Right baseline oximetry (%)            | 67.9 [64.6 to 70.3]    | 64.0 [59.4 to 69.0]    | ( <i>P</i> =0.286) |
| Pulse oximetry (%) <sup>f</sup>        | 98.5 [98.1 to 99.0]    | 98.5 [97.9 to 99.0]    | ( <i>P</i> =0.834) |
| LOS (days) <sup>g</sup>                | 5 [2.0 to 12.0]        | 5 [1.8 to 11.5]        | ( <i>P</i> =0.988) |
| Type of surgery                        |                        |                        |                    |
| colorectal                             | 2 (11.1)               | 1 (5.0)                |                    |
| endocrine                              | 2 (11.1)               | 2 (10.0)               |                    |
| ear nose & throat                      | 0 (0.0)                | 1 (5.0)                |                    |
| hepatobiliary                          | 6 (33.3)               | 9 (45.0)               |                    |
| spinal surgery <sup>h</sup>            | 1 (5.6)                | 1 (5.0)                |                    |
| orthopedic                             | 2 (11.1)               | 1 (5.0)                |                    |
| thoracic <sup>i</sup>                  | 4 (22.2)               | 1 (5.0)                |                    |
| urology                                | 1 (5.6)                | 3 (15.0)               |                    |
| vascular                               | 0 (0.0)                | 1 (5.0)                |                    |

<sup>a</sup> data reported as number (%) or median [inter-quartile range], except for age, which is reported as median [range]

<sup>b</sup> TMH: targeted mild hypercapnia, TN: targeted normocapnia

<sup>c</sup> BMI: body mass index

<sup>d</sup> ASA: American Society of Anesthesiologists

<sup>e</sup> COPD: chronic obstructive pulmonary disease

<sup>f</sup> peripheral oxygen saturation measured by pulse oximetry

<sup>g</sup> LOS: length of hospital stay

<sup>h</sup> non-intracranial procedures, e.g. complex spinal surgery

<sup>i</sup> includes procedures not requiring one lung ventilation, e.g. mediastinoscopy with nodal dissection

Both groups were similar in terms of gender, age, weight, body mass index, ASA physical status, and type of surgery performed. In terms of co-morbidities, both groups were similar except for the presence of chronic obstructive pulmonary disease. There was 100% compliance to the designated *PaCO*<sub>2</sub> intra-operative targets. The median [inter-quartile range, IQR] *PaCO*<sub>2</sub> in the TMH group and TN groups were 51.5 mmHg [46.9 to 60.9] and 34.8

1  
2  
3 mmHg [32.8 to 38.1] respectively ( $P<0.001$ ). With regards to surgical characteristics, median  
4 duration of surgery was longer in the TMN group with median [IQR] duration of 219 min  
5 [124 to 304] versus 144 min [108 to 218] in the TN group ( $P=0.121$ ).  $PaO_2$  was similar  
6 between the two groups: 156.8 mmHg [146.3 to 217.2] in the TMH group and 142.5 mmHg  
7 [122.5 to 199.1] in the TN group ( $P=0.380$ ). Oxygen saturation was similar: 98.5% in the  
8 TMH group [98.1 to 99.0], and 98.5% in the TN group [97.9 to 99.0] ( $P=0.834$ ). Both groups  
9 also had similar mean arterial pressure intra-operatively ( $P=0.307$ ), similar total haemoglobin  
10 (130.50 vs. 122.25 g L<sup>-1</sup>;  $P=0.132$ ), and similar total dose of intra-operative opioid received,  
11 21.67 mg in the TMH group [13.75 to 32.50] and 16.67 mg in the TN group [10.00 to 22.50]  
12 ( $P=0.22$ ).

### 21 22 *Primary endpoint*

23  
24 On the left hemisphere, the median [IQR] baseline oximetry was 68.7% [63.9 to 72.2] in the  
25 TMH group vs. 63.4% [57.3 to 69.6] in the TN group ( $P=0.233$ ). On the right hemisphere the  
26 median [IQR] baseline oximetry was 67.9% [64.6 to 70.3] in the TMH group vs. 64.0% [59.4  
27 to 69.9] TN group ( $P=0.286$ ). On both sides, the  $\% \Delta rSO_2$  was greater in the TMH group than  
28 the TN group throughout the duration of surgery (**Figure 2**). The average (standard deviation,  
29 SD) percentage changes in  $rSO_2$  from the baseline to the conclusion of the surgery in TMH  
30 group were +8.56% (18.90%) on the left and +13.86% (18.17%) on the right, and in TN  
31 group they were -6.18% (17.24%) on the left and -5.48% (18.94%) on the right. The resulting  
32 treatment effects were 19% (95% CI [9.2 to 28.8];  $P<0.001$ ) on the left and 19% (95% CI  
33 [10.9 to 27.0];  $P<0.001$ ) on the right (**Table 2**).

**Table 2.** Percentage change in cerebral oximetry (% $\Delta$ rSO<sub>2</sub>) from baseline.<sup>a</sup>

| Time from start of surgery (mins) |                  | 15                 | 30                 | 45                  | 60                  | 75                  | 90                  | 105                 | 120                 |
|-----------------------------------|------------------|--------------------|--------------------|---------------------|---------------------|---------------------|---------------------|---------------------|---------------------|
| Left                              | TMH <sup>b</sup> | 0.8 (12.9)<br>{15} | 5.8 (12.3)<br>{15} | 9.0 (15.9)<br>{15}  | 7.0 (14.6)<br>{15}  | 8.5 (15.4)<br>{14}  | 7.3 (14.7)<br>{13}  | 7.7 (17.4)<br>{13}  | 8.1 (14.8)<br>{13}  |
|                                   | TN <sup>b</sup>  | 4.7 (10.5)<br>{18} | 3.2 (15.4)<br>{18} | -1.9 (14.1)<br>{17} | -5.6 (12.7)<br>{17} | -5.3 (15.2)<br>{17} | -5.5 (15.8)<br>{17} | -6.0 (15.2)<br>{17} | -3.6 (15.8)<br>{14} |
| Right                             | TMH              | 6.0 (12.9)<br>{17} | 9.8 (13.2)<br>{17} | 10.4 (18.1)<br>{17} | 11.1 (17.4)<br>{17} | 13.0 (16.4)<br>{16} | 15.6 (17.3)<br>{15} | 14.4 (17.5)<br>{14} | 14.1 (13.6)<br>{14} |
|                                   | TN               | 5.2 (12.6)<br>{20} | 3.9 (11.7)<br>{20} | -3.3 (13.2)<br>{19} | -5.2 (12.1)<br>{19} | -5.4 (12.3)<br>{19} | -4.7 (14.1)<br>{19} | -3.8 (13.7)<br>{18} | -1.3 (13.9)<br>{15} |

| Time from start of surgery (mins) |     | 120                 | 240                 | 360                 | 480                | 600                | 720             | Mean % difference from start to completion of surgery | 95% confidence interval | P value (treatment) |
|-----------------------------------|-----|---------------------|---------------------|---------------------|--------------------|--------------------|-----------------|-------------------------------------------------------|-------------------------|---------------------|
| Left                              | TMH | 8.1 (14.8)<br>{13}  | 6.8 (20.6)<br>{7}   | 6.4 (32.5)<br>{4}   | -8.6 (21.1)<br>{3} | -6.1 (14.1)<br>{3} | 6.9 (NA)<br>{1} | 19.0                                                  | 9.2 -28.8               | <0.001              |
|                                   | TN  | -3.6 (15.8)<br>{14} | -10.4 (39.5)<br>{5} | -43.4 (34.9)<br>{2} | -27.8 (NA)<br>{1}  |                    |                 |                                                       |                         |                     |
| Right                             | TMH | 14.1 (13.6)<br>{14} | 18.4 (23.5)<br>{8}  | 16.8 (36.8)<br>{4}  | 1.5 (14.9)<br>{3}  | 3.0 (8.7)<br>{3}   | 2.0 (NA)<br>{1} | 19.0                                                  | 10.9- 27.0              | <0.001              |
|                                   | TN  | -1.3 (13.9)<br>{15} | -5.3 (32.6)<br>{5}  | -35.4 (26.9)<br>{2} | -37.8 (NA)<br>{1}  |                    |                 |                                                       |                         |                     |

<sup>a</sup> Data are presented every 15 minutes for the first 2 hours and every 2 hours afterwards, and are reported as mean (standard deviation) {sample size}.

<sup>b</sup> TMH: targeted mild hypercapnia, TN: targeted normocapnia

On the longitudinal time-by-treatment interaction analysis, the difference in % $\Delta$ rSO<sub>2</sub> on both left and right between the two groups diverged with time with the intervention group exhibiting smaller percentage decrease over time compared to the control group (time-by-treatment interaction  $P < 0.001$  for both left and right hemispheres). We obtained very similar results on robustness analyses when the above model was adjusted for age, baseline oximetry and pre-operative haemoglobin levels, as well as when percentage of total duration of surgery instead of minutes from the start of surgery were included.

### Secondary outcomes

Postoperative delirium was statistically significantly less common in the TMH group. Postoperative delirium was present in 0/20 (0%) participants in the TMH group and 6/20 (30%) participants in the TN group (risk difference 0.3, 95% CI [0.1 to 0.5], Fisher's exact  $P = 0.02$ ) (Table 3).

**Table 3.** Postoperative delirium and opioid doses <sup>a</sup>

|                                           | TMH group <sup>b</sup><br>(n=20) | TN group <sup>b</sup><br>(n=20) |                |
|-------------------------------------------|----------------------------------|---------------------------------|----------------|
| <b>Pre-medication</b>                     |                                  |                                 |                |
| Number of patients                        | 0 (0)                            | 2 (10.0)                        |                |
| Mean midazolam dose (mg)                  | 0                                | 1.75                            |                |
| <b>Intra-operative opioid<sup>c</sup></b> |                                  |                                 |                |
| Total dose (mg) <sup>d</sup>              | 21.67 [13.75 to 32.50]           | 16.67 [10.00 to 22.50]          | ( $P = 0.22$ ) |
| Received i.v. morphine (%)                | 2 (10)                           | 1 (5)                           |                |
| Received i.v. fentanyl (%)                | 10 (50)                          | 14 (70)                         |                |
| Received i.v. oxycodone (%)               | 9 (45)                           | 7 (35)                          |                |
| Received i.v. tramadol (%)                | 4 (20)                           | 0 (0)                           |                |
| Received i.v. clonidine (%)               | 0 (0)                            | 2 (10)                          |                |
| <b>Intrathecal morphine</b>               |                                  |                                 |                |
| Number of patients                        | 5                                | 2                               |                |
| Mean dose (mcg)                           | 220                              | 350                             |                |

|                                           |                  |                  |                   |
|-------------------------------------------|------------------|------------------|-------------------|
| <b>Epidural analgesia</b>                 |                  |                  |                   |
| Number of patients                        | 0                | 0                |                   |
| <b>Blood glucose level</b>                |                  |                  |                   |
| Glucose (mmol L <sup>-1</sup> )           | 7.1 [7.0 to 7.1] | 6.6 [6.4 to 6.7] | ( <i>P</i> =0.33) |
| <b>Pre-operative CAM<sup>e</sup></b>      | 0 [0 to 0]       | 0 [0 to 0]       |                   |
| <b>Postoperative CAM<sup>e</sup></b>      | 0 [0 to 0]       | 1.5 [0 to 3]     |                   |
| <b>Presence of postoperative delirium</b> | 0 (0.0)          | 6 (30.0)         | ( <i>P</i> =0.02) |

<sup>a</sup> Data reported as median [inter-quartile range] or number (%)

<sup>b</sup> TMH: targeted mild hypercapnia, TN: targeted normocapnia

<sup>c</sup> Note some patients received 2 or more different opioids

<sup>d</sup> Total dose normalised to i.v. morphine equivalent

<sup>e</sup> CAM: Confusion Assessment Method

In terms of acid base variables, median intra-operative pH was statistically significantly lower (7.31 vs. 7.46; *P*<0.001) and intra-operative bicarbonate was statistically significantly higher (25.00 vs. 24.00 mEq L<sup>-1</sup>; *P*=0.020) in the TMH. No statistically significant differences in base excess (-1.00 vs. 1.00 mmol L<sup>-1</sup>; *P*=0.069) and potassium (3.98 vs. 4.03 mEq L<sup>-1</sup>; *P*=0.759) were observed intra-operatively. Length of hospital stay was also similar between the two groups without statistically significant difference (5 vs. 5 days; *P*=0.988). These results are summarized in **Table 4**.

**Table 4.** Average arterial blood gas values <sup>a</sup> and corresponding end-tidal carbon dioxide

|                                            | <b>TMH group<sup>b</sup></b><br>( <i>n</i> =20) | <b>TN group<sup>b</sup></b><br>( <i>n</i> =20) | <i>P</i> -value |
|--------------------------------------------|-------------------------------------------------|------------------------------------------------|-----------------|
| pH                                         | 7.31 [7.27 to 7.33]                             | 7.46 [7.43 to 7.47]                            | <0.001          |
| PaO <sub>2</sub> (mmHg) <sup>c</sup>       | 156.8 [146.3 to 217.2]                          | 142.5 [122.5 to 199.1]                         | 0.380           |
| PaCO <sub>2</sub> (mmHg) <sup>d</sup>      | 51.50 [46.88 to 60.88]                          | 34.75 [32.75 to 38.12]                         | <0.001          |
| EtCO <sub>2</sub> (mmHg) <sup>e</sup>      | 46.40 [39.80 to 50.20]                          | 30.40 [28.50 to 32.00]                         | <0.001          |
| Bicarbonate (mEq L <sup>-1</sup> )         | 25.00 [24.00 to 27.75]                          | 24.00 [22.00 to 24.62]                         | 0.020           |
| Base excess (mmol L <sup>-1</sup> )        | -1.00 [-2.50 to 0.25]                           | 1.00 [-0.88 to 2.00]                           | 0.069           |
| Potassium (mEq L <sup>-1</sup> )           | 3.98 [3.73 to 4.38]                             | 4.03 [3.58 to 4.31]                            | 0.759           |
| Total Hb (g L <sup>-1</sup> ) <sup>f</sup> | 130.50 [118.12 to 140.62]                       | 122.25 [106.88 to 131.25]                      | 0.132           |

1  
2  
3  
4     <sup>a</sup>Data reported as median [inter-quartile range] or number (%)

5  
6     <sup>b</sup>TMH: targeted mild hypercapnia, TN: targeted normocapnia

7     <sup>c</sup> $PaO_2$ : partial pressure of oxygen in arterial blood

8     <sup>d</sup> $PaCO_2$ : partial pressure of carbon dioxide in arterial blood

9  
10     <sup>e</sup> $EtCO_2$ : end tidal carbon dioxide

11     <sup>f</sup>Hb: haemoglobin concentration  
12  
13  
14  
15  
16  
17  
18  
19  
20  
21  
22  
23  
24  
25  
26  
27  
28  
29  
30  
31  
32  
33  
34  
35  
36  
37  
38  
39  
40  
41  
42  
43  
44  
45  
46  
47  
48  
49  
50  
51  
52  
53  
54  
55  
56  
57  
58  
59  
60

For peer review only

## **Discussion**

We conducted a prospective, single centre, single blinded, randomised controlled trial evaluating the effects of targeted mild hypercapnia (TMH) and targeted normocapnia (TN) on regional cerebral oxygen saturation (rSO<sub>2</sub>) in patients undergoing major surgery. TMH led to a stable increase in both left and right NIRS-derived regional cerebral oxygen saturation from baseline values while TN led to a decrease in rSO<sub>2</sub>. This effect sustained throughout surgery and became more pronounced with the passage of time. Furthermore, TMH was associated with a lower incidence of postoperative delirium within 24 hours after surgery.

Whilst the relationship between elevated PaCO<sub>2</sub> and cerebral blood flow is well described,<sup>26-28</sup> the associations between hypercapnia and higher rSO<sub>2</sub> are poorly understood. Numerous factors, for instance, cardiac output, oxygen affinity of haemoglobin, cerebral autoregulation, and the ratio of cerebral arterial to venous blood volume, affect rSO<sub>2</sub> in the setting of hypercapnia, but changes in PaCO<sub>2</sub> and CBF, in turn, have direct influence on these factors.<sup>29</sup> To complicate the subject further, the duration of effect of hypercapnia on rSO<sub>2</sub> is unknown. In our study, confounding variables, such as MAP, PaO<sub>2</sub>, and Hb were similar between the TMH and TN groups. However, pH, which directly affects the oxygen affinity of haemoglobin via the Bohr Effect, was significantly different. Since we cannot measure the ratio of arterial to venous blood volume, it would be impetuous to comment on the mechanism behind the observed higher rSO<sub>2</sub> values in TMH. Clinically, similar observations have been reported previously. Eastwood *et al.* found that mild hypercapnia resulted in higher rSO<sub>2</sub> values in post-cardiac arrest patients when rSO<sub>2</sub> values at the end of the normocapnic period and the end of the hypercapnic period were compared.<sup>30</sup> When Akca *et al.* delivered mild hypercapnia intra-operatively to investigate tissue oxygenation and its relationship with wound infection risk after surgery, cerebral oxygen saturation was found to be higher in mild hypercapnic group.<sup>15</sup> Similarly rSO<sub>2</sub> remained higher in hypercapnic patients throughout shoulder surgery, and less cerebral desaturation events were observed by Murphy *et al.*<sup>31</sup> Giardino *et al.* reviewed how changes in respiratory alternations in patients with anxiety alter CBF and found that changes in CBF over time in acute hypercapnia or hypocapnia have high individual

1  
2  
3  
4 variability and CBF might never attain a true steady-state period with time.<sup>32</sup> Our study  
5 is one of the few randomised-controlled trials that investigated rSO<sub>2</sub> change over time.  
6 We found that the sustained difference in rSO<sub>2</sub> over time was a combined effect of  
7 stable increase in rSO<sub>2</sub> from baseline in the TMH group and a stable decrease in rSO<sub>2</sub>  
8 from baseline in the TN group. In the literature, the association between normocapnia  
9 and reduced CBF and lower levels of rSO<sub>2</sub> were reported briefly.<sup>33</sup> Normocapnia was  
10 also found to be superior in preserving cerebral autoregulation,<sup>34</sup> however, the exact  
11 mechanism and associations between normocapnia and variations in rSO<sub>2</sub> values are not  
12 entirely clear. Whilst theoretical absolute and relative saturation thresholds requiring  
13 prompt interventions have been proposed,<sup>14</sup> these thresholds have not been validated  
14 and there is a lack of consensus on the indication and timing of interventions. In our  
15 study, reduction in rSO<sub>2</sub> from baseline was small in the majority of patients in the TN  
16 group and the attending anaesthetists had no rSO<sub>2</sub> target to titrate to. Comparing the  
17 TMH and TN groups, the sustained difference in percentage change in rSO<sub>2</sub> over time is  
18 a novel finding.  
19  
20  
21  
22  
23  
24  
25  
26  
27  
28  
29  
30  
31  
32

33 Interestingly, the incidence of postoperative delirium after surgery was lower in the  
34 TMH group while LOS remained similar between the groups. Patients who suffered  
35 from postoperative delirium were all in the TN group but they were also older (median  
36 [IQR] age 72 [59.5 to 77]) and had higher ASA scores (ASA scores of 3, 2, 1, 4 and 4).  
37 Their baseline medical co-morbidities and duration of surgery (median [IQR] duration  
38 of surgery 171 minutes [83.5 to 254.5]) were similar to other study participants. There  
39 has been conflicting evidence in the literature regarding the relationship between rSO<sub>2</sub>  
40 and LOS or postoperative cognitive performance. Cognitive outcomes were similar in  
41 groups with or without NIRS-based rSO<sub>2</sub> optimisation in a recent randomised controlled  
42 trial.<sup>14,35</sup> On the other hand, Murkin *et al.* found that monitoring and reacting to  
43 cerebral desaturation during coronary artery bypass surgery was associated with clinical  
44 benefits.<sup>13</sup> Patients with shorter LOS (<10 days) had higher mean rSO<sub>2</sub>. Intra-operative  
45 NIRS rSO<sub>2</sub> monitoring led to a significant reduction in postoperative cognitive  
46 disturbance confirmed by Trafidlo *et al.*<sup>36</sup> Casati *et al.* also reported that higher rSO<sub>2</sub> led  
47 to shorter LOS and improved Mini-Mental State Examination scores in elderly patients  
48 undergoing major abdominal surgery,<sup>37</sup> and Schoen *et al.* found that low pre-operative  
49  
50  
51  
52  
53  
54  
55  
56  
57  
58  
59  
60



1  
2  
3  
4 rSO<sub>2</sub> was associated with higher incidence of postoperative delirium. Among patients  
5 who started at a normal saturation level, those who developed delirium had a larger  
6 intra-operative drop in rSO<sub>2</sub>.<sup>38</sup> Our findings were consistent with Schoen *et al.*,  
7 however, they need to be interpreted with caution as the ASA scores and age were  
8 slightly higher in the TN group, and our study was not designed to quantitatively  
9 investigate postoperative cognitive performance in hypercapnia.  
10  
11  
12  
13  
14  
15  
16

17 Implications of our findings demonstrate that TMH can be delivered reliably during  
18 major surgery and its effects on rSO<sub>2</sub> can be monitored with NIRS in most patients. Its  
19 delivery is reliably associated with increased levels of rSO<sub>2</sub>, and the relatively higher  
20 rSO<sub>2</sub> is sustained over the duration of surgery, an observation that has not been reported  
21 in the literature. Furthermore, TMH may reduce the incidence of the development of  
22 immediate postoperative delirium. A clinical concern of mild hypercapnia is  
23 hypercapnic-induced acidosis and the subsequent development of hyperkalaemia.  
24 Whilst a linear correlation between arterial carbon dioxide and plasma pH is well  
25 reported,<sup>39</sup> the relationship between acute hypercarbia, respiratory acidosis and plasma  
26 potassium is also poorly understood.<sup>40</sup> In the present study, we found no association  
27 between hypercarbia and serum potassium concentrations, a finding also supported by  
28 others.<sup>41</sup> We did not observe any other deleterious or adverse effects from hypercapnic-  
29 induced acidosis such as cardiac arrhythmias in our study. Interestingly, whilst our  
30 study was not designed to measure differences in analgesia and partial pressure of  
31 oxygen in arterial blood, we observed a 10% higher median PaO<sub>2</sub> level in the TMH  
32 group, and found that the median intraoperative analgesia requirements were also  
33 approximately 30% higher. Both arterial oxygen levels and pain have been reported to  
34 influence tissue oxygenation,<sup>42</sup> which was not directly measured in our study. The effect  
35 of pain on cerebral oxygenation is unclear, and has not been borne out in clinical studies;<sup>43</sup>  
36 further studies exploring this association are needed. Finally, we have shown that NIRS-  
37 based cerebral oximetry is a non-invasive and practical method of measuring rSO<sub>2</sub>,  
38 easily incorporated into the existing collection of routine monitoring variables, findings  
39 that are in agreement with other research groups.<sup>20,44-46</sup>  
40  
41  
42  
43  
44  
45  
46  
47  
48  
49  
50  
51  
52  
53  
54  
55  
56  
57  
58  
59  
60

1  
2  
3  
4 Our study has multiple strengths. Our findings have high internal validity because the  
5 study was a randomised controlled trial with concealed allocation and blinded  
6 assessment, minimising selection and ascertainment bias. rSO<sub>2</sub> data were exported  
7 directly to RStudio, and ABG data were analysed by the ABL Blood Gas Analyzer,  
8 rendering sampling error from data entry unlikely, thereby increasing the robustness of  
9 our findings. Sampling of continuous oximetry data resulted in a stream of oximetry  
10 data throughout the monitoring periods, maximizing the details of our assessment.  
11 Although the duration of surgery was different for individual patients, oximetry data  
12 were not normalised to another time scale, enabling a fair comparison of data across the  
13 study groups. NIRS-derived rSO<sub>2</sub> has been criticised for potential extra-cranial  
14 contamination that would confound true rSO<sub>2</sub>.<sup>47</sup> However, there is sufficient evidence to  
15 support the accuracy of NIRS-derived rSO<sub>2</sub>,<sup>20,44</sup> particularly in the case of hypercapnia,  
16 where extra-cranial signal interference has been shown to be insignificant, justifying its  
17 reliability.<sup>48</sup> Moreover, as the technology was the same in both groups, any inaccuracy  
18 should not have been a source of bias.  
19  
20  
21  
22  
23  
24  
25  
26  
27  
28  
29  
30  
31  
32

33 Our study also has a number of limitations. The attending anaesthetists were not blinded  
34 due to the nature of the intervention. Nevertheless, bias was mitigated by the fact that  
35 measurements were taken directly from the cerebral oximetry machine and assessment  
36 of delirium was conducted by an independent researcher blinded to the intervention.  
37 The external validity of our findings was restricted by the small sample size from one  
38 single centre. Sample size calculation was based on the assumption that there were no  
39 changes in rSO<sub>2</sub> values from baseline in the TN group. The observed negative change  
40 can therefore impact the calculation. The strong nature of interaction between treatment  
41 and time for rSO<sub>2</sub> outcome should be treated with caution due to the potential minor  
42 departures of the data from the linear trend. Our findings were not applicable to patients  
43 undergoing emergency surgery, intracranial surgery, or surgery requiring one lung  
44 ventilation. The cerebral oximetry probes were only attached to the forehead, measuring  
45 rSO<sub>2</sub> within the frontal cortex region, which carries the assumption that rSO<sub>2</sub> was  
46 homogenous across every area of the brain. This assumption will need to be tested for  
47 the posterior circulation in future studies. Quantification of device failure rate, despite  
48 being a critical consideration, cannot be described by our study design.  
49  
50  
51  
52  
53  
54  
55  
56  
57  
58  
59  
60

We did not measure cardiac output, stroke volume and systemic vascular resistance. Therefore, the effects on changes in intrathoracic pressures on cardiac output are unknown. Changes in intrathoracic pressure may have adversely impacted cardiac output, which may in turn have affected the EtCO<sub>2</sub>. However, given that the PEEP was held constant in both groups, and the changes in lung tidal volumes were relatively small, the impact of intrathoracic pressure on cardiac output is likely to be small. Finally, our findings of a greater incidence of early postoperative delirium in the TN group need to be interpreted with caution as confounders of postoperative delirium were not controlled, our study was not powered to investigate postoperative delirium, and mental state was only assessed by CAM, once pre-operatively and once postoperatively. Accordingly, our findings for delirium should be viewed as hypothesis generating. Nevertheless, if we were to consider that our effect size observed (i.e. 0.13) could be due to chance and a smaller effect would be observed in a larger study, an appropriate powered RCT for this outcome would be very feasible. If the proportion of patients with delirium in the intervention group is 10%, to achieve 90% power, the required sample size for each group would be ninety two.

## **Conclusion**

In summary, in patients undergoing elective major surgery, targeted mild hypercapnia was associated with a stable increase in regional cerebral oxygen saturation from baseline while targeted normocapnia was associated with a decrease in regional cerebral oxygen saturation from baseline in both hemispheres. This effect was sustained and became more marked with the passage of time intra-operatively, resulting in a clear separation of the percentage change in regional cerebral oxygen saturation between TMH and TN groups over time. These preliminary findings provide the rationale and justification for larger investigations of this intervention.

## **Author Contributions**

Clarence Wong: This author contributed to data collection, data analysis, and writing up of manuscript

Leonid Churilov: This author contributed to data analysis and writing up of manuscript

Dean Cowie: This author contributed to patient recruitment, data collection, and writing up of manuscript

Chong Tan: This author contributed to patient recruitment and writing up of manuscript

Raymond Hu: This author contributed to patient recruitment and writing up of manuscript

David Tremewen: This author contributed to patient recruitment and writing up of manuscript

Brett Pearce: This author contributed to patient recruitment and writing up of manuscript

Param Pillai: This author contributed to data collection and writing up of manuscript

Dharshi Karalipillai: This author contributed to data collection and writing up of manuscript

Rinaldo Bellomo: This author contributed to study design and writing up of manuscript

Laurence Weinberg: This author designed the study, contributed to patient recruitment, data collection, data analysis and writing up of manuscript

## References

1. Brosnan RJ, Steffey EP, LeCouteur RA, Imai A, Farver TB, Kortz GD. Effects of ventilation and isoflurane end-tidal concentration on intracranial and cerebral perfusion pressures in horses. *American journal of veterinary research*. 2003;64(1):21-25.
2. Faraci FM, Breese KR, Heistad DD. Cerebral vasodilation during hypercapnia. Role of glibenclamide-sensitive potassium channels and nitric oxide. *Stroke*. 1994;25(8):1679-1683.
3. Hino JK, Short BL, Rais-Bahrami K, Seale WR. Cerebral blood flow and metabolism during and after prolonged hypercapnia in newborn lambs. *Critical care medicine*. 2000;28(10):3505-3510.
4. Nakahata MDK, Kinoshita MDPDH, Hirano MDY, Kimoto MDY, Iranami MDH, Hatano MDPDY. Mild Hypercapnia Induces Vasodilation via Adenosine Triphosphate-sensitive K<sup>+</sup>Channels in Parenchymal Microvessels of the Rat Cerebral Cortex. *Anesthesiology*. 2003;99(6):1333-1339.
5. Kaku DA, Giffard RG, Choi DW. Neuroprotective effects of glutamate antagonists and extracellular acidity. *Science (New York, NY)*. 1993;260(5113):1516-1518.
6. Vannucci RC, Brucklacher RM, Vannucci SJ. Effect of Carbon Dioxide on Cerebral Metabolism during Hypoxia-Ischemia in the Immature Rat. *Pediatr Res*. 1997;42(1):24-29.
7. Murkin JM, Arango M. Near-infrared spectroscopy as an index of brain and tissue oxygenation. *British journal of anaesthesia*. 2009;103 Suppl 1:i3-13.
8. Elizabeth A, Frost M. Cerebral oximetry: emerging applications for an established technology. *Anesthesiol News*. 2012;38:10.
9. Steppan J, Hogue CW, Jr. Cerebral and tissue oximetry. *Best Pract Res Clin Anaesthesiol*. 2014;28(4):429-439.
10. Ahn A, Yang J, Inigo-Santiago L, Parnia S. A feasibility study of cerebral oximetry monitoring during the post-resuscitation period in comatose patients following cardiac arrest. *Resuscitation*. 2014;85(4):522-526.

11. Storm C, Leithner C, Krannich A, et al. Regional cerebral oxygen saturation after cardiac arrest in 60 patients--a prospective outcome study. *Resuscitation*. 2014;85(8):1037-1041.
12. Ito N, Nishiyama K, Callaway CW, et al. Noninvasive regional cerebral oxygen saturation for neurological prognostication of patients with out-of-hospital cardiac arrest: a prospective multicenter observational study. *Resuscitation*. 2014;85(6):778-784.
13. Murkin JM, Adams SJ, Novick RJ, et al. Monitoring brain oxygen saturation during coronary bypass surgery: a randomized, prospective study. *Anesthesia and analgesia*. 2007;104(1):51-58.
14. Deschamps A, Hall R, Grocott H, et al. Cerebral Oximetry Monitoring to Maintain Normal Cerebral Oxygen Saturation during High-risk Cardiac Surgery: A Randomized Controlled Feasibility Trial. *Anesthesiology*. 2016;124(4):826-836.
15. Akca O, Liem E, Suleman MI, Doufas AG, Galandiuk S, Sessler DI. Effect of intra-operative end-tidal carbon dioxide partial pressure on tissue oxygenation. *Anaesthesia*. 2003;58(6):536-542.
16. Robinson TN, Eiseman B. Postoperative delirium in the elderly: diagnosis and management. *Clinical Interventions in Aging*. 2008;3(2):351-355.
17. Liu LL, Leung JM. Predicting adverse postoperative outcomes in patients aged 80 years or older. *Journal of the American Geriatrics Society*. 2000;48(4):405-412.
18. Inouye SK. Delirium in older persons. *The New England journal of medicine*. 2006;354(11):1157-1165.
19. Schulz KF, Altman DG, Moher D. CONSORT 2010 Statement: updated guidelines for reporting parallel group randomised trials. *BMJ*. 2010;340.
20. Redford D, Paidy S, Kashif F. Absolute and trend accuracy of a new regional oximeter in healthy volunteers during controlled hypoxia. *Anesth Analg*. 2014;119(6):1315-1319.
21. Inouye SK, van Dyck CH, Alessi CA, Balkin S, Siegal AP, Horwitz RI. Clarifying confusion: the confusion assessment method. A new method for detection of delirium. *Annals of internal medicine*. 1990;113(12):941-948.

- 1
  - 2
  - 3
  - 4
  - 5
  - 6
  - 7
  - 8
  - 9
  - 10
  - 11
  - 12
  - 13
  - 14
  - 15
  - 16
  - 17
  - 18
  - 19
  - 20
  - 21
  - 22
  - 23
  - 24
  - 25
  - 26
  - 27
  - 28
  - 29
  - 30
  - 31
  - 32
  - 33
  - 34
  - 35
  - 36
  - 37
  - 38
  - 39
  - 40
  - 41
  - 42
  - 43
  - 44
  - 45
  - 46
  - 47
  - 48
  - 49
  - 50
  - 51
  - 52
  - 53
  - 54
  - 55
  - 56
  - 57
  - 58
  - 59
  - 60
22. Sharon K, Inouye MD, MPH. Confusion Assessment Method: Training Manual and Coding Guide, Copyright 2003.
23. National Blood Authority. Blood Management Guidelines: Module 2 Perioperative. 2012; <http://www.nba.gov.au/guidelines/module2/po-mod2.pdf2>.
24. Vretzakis G, Georgopoulou S, Stamoulis K, et al. Cerebral oximetry in cardiac anesthesia. *Journal of thoracic disease*. 2014;6 Suppl 1:S60-69.
25. Lang TA, Altman DG. Basic statistical reporting for articles published in biomedical journals: the "Statistical Analyses and Methods in the Published Literature" or the SAMPL Guidelines. *International journal of nursing studies*. 2015;52(1):5-9.
26. Curley G, Laffey JG, Kavanagh BP. Bench-to-bedside review: carbon dioxide. *Critical care (London, England)*. 2010;14(2):220.
27. Yokoyama I, Inoue Y, Kinoshita T, Itoh H, Kanno I, Iida H. Heart and brain circulation and CO<sub>2</sub> in healthy men. *Acta physiologica (Oxford, England)*. 2008;193(3):303-308.
28. Battisti-Charbonney A, Fisher J, Duffin J. The cerebrovascular response to carbon dioxide in humans. *J Physiol*. 2011;589(Pt 12):3039-3048.
29. Vranken NPA, Weerwind PW, Sutedja NA, Severdija EE, Barenbrug PJC, Maessen JG. Cerebral Oximetry and Autoregulation during Cardiopulmonary Bypass: A Review. *The journal of extra-corporeal technology*. 2017;49(3):182-191.
30. Eastwood GM, Tanaka A, Bellomo R. Cerebral oxygenation in mechanically ventilated early cardiac arrest survivors: The impact of hypercapnia. *Resuscitation*. 2016;102:11-16.
31. Murphy GS, Szokol JW, Avram MJ, et al. Effect of ventilation on cerebral oxygenation in patients undergoing surgery in the beach chair position: a randomized controlled trial. *British journal of anaesthesia*. 2014;113(4):618-627.
32. Giardino ND, Friedman SD, Dager SR. Anxiety, respiration, and cerebral blood flow: implications for functional brain imaging. *Comprehensive psychiatry*. 2007;48(2):103-112.

- 1  
2  
3  
4 33. Brian Johnny E, MD. Carbon Dioxide and the Cerebral  
5 Circulation *Anesthesiology: The Journal of the American Society of*  
6 *Anesthesiologists*. 1998;88(5):1365-1386.  
7  
8  
9 34. Severdija EE, Vranken NP, Simons AP, et al. Hemodilution Combined With  
10 Hypercapnia Impairs Cerebral Autoregulation During Normothermic  
11 Cardiopulmonary Bypass. *Journal of cardiothoracic and vascular anesthesia*.  
12 2015;29(5):1194-1199.  
13  
14 35. Rogers CA, Stoica S, Ellis L, et al. Randomized trial of near-infrared  
15 spectroscopy for personalized optimization of cerebral tissue oxygenation during  
16 cardiac surgery. *Br J Anaesth*. 2017;119(3):384-393.  
17  
18 36. Trafidlo T, Gaszynski T, Gaszynski W, Nowakowska-Domagala K.  
19 Intraoperative monitoring of cerebral NIRS oximetry leads to better  
20 postoperative cognitive performance: a pilot study. *International journal of*  
21 *surgery (London, England)*. 2015;16(Pt A):23-30.  
22  
23 37. Casati A, Fanelli G, Pietropaoli P, et al. Continuous monitoring of cerebral  
24 oxygen saturation in elderly patients undergoing major abdominal surgery  
25 minimizes brain exposure to potential hypoxia. *Anesth Analg*. 2005;101(3):740-  
26 747, table of contents.  
27  
28 38. Schoen J, Meyerrose J, Paarmann H, Heringlake M, Hueppe M, Berger K-U.  
29 Preoperative regional cerebral oxygen saturation is a predictor of postoperative  
30 delirium in on-pump cardiac surgery patients: a prospective observational trial.  
31 *Critical Care*. 2011;15(5):R218-R218.  
32  
33 39. Finsterer U, Luhr HG, Wirth AE. Effects of acute hypercapnia and hypocapnia  
34 on plasma and red cell potassium, blood lactate and base excess in man during  
35 anesthesia. *Acta anaesthesiologica Scandinavica*. 1978;22(4):353-366.  
36  
37 40. Adroque HJ, Madias NE. Changes in plasma potassium concentration during  
38 acute acid-base disturbances. *The American journal of medicine*.  
39 1981;71(3):456-467.  
40  
41 41. Natalini G, Seramondi V, Fassini P, et al. Acute respiratory acidosis does not  
42 increase plasma potassium in normokalaemic anaesthetized patients. A  
43 controlled randomized trial. *European Journal of Anaesthesiology*.  
44 2006;18(6):394-400.  
45  
46  
47  
48  
49  
50  
51  
52  
53  
54  
55  
56  
57  
58  
59  
60



- 1  
2  
3  
4  
5  
6  
7  
8  
9  
10  
11  
12  
13  
14  
15  
16  
17  
18  
19  
20  
21  
22  
23  
24  
25  
26  
27  
28  
29  
30  
31  
32  
33  
34  
35  
36  
37  
38  
39  
40  
41  
42  
43  
44  
45  
46  
47  
48  
49  
50  
51  
52  
53  
54  
55  
56  
57  
58  
59  
60
42. Akca O. Pain and Tissue Oxygenation. *Critical care medicine*. 2015;43:e462-463.
  43. Hoiseth LO, Hisdal J, Hoff IE, Hagen OA, Landsverk SA, Kirkeboen KA. Tissue oxygen saturation and finger perfusion index in central hypovolemia: influence of pain. *Crit Care Med*. 2015;43(4):747-756.
  44. MacLeod DB, Ikeda K, Vacchiano C, Lobbstaël A, Wahr JA, Shaw AD. Development and validation of a cerebral oximeter capable of absolute accuracy. *Journal of cardiothoracic and vascular anesthesia*. 2012;26(6):1007-1014.
  45. Watzman HM, Kurth CD, Montenegro LM, Rome J, Steven JM, Nicolson SC. Arterial and venous contributions to near-infrared cerebral oximetry. *Anesthesiology*. 2000;93(4):947-953.
  46. Brady K, Joshi B, Zweifel C, et al. Real-time continuous monitoring of cerebral blood flow autoregulation using near-infrared spectroscopy in patients undergoing cardiopulmonary bypass. *Stroke*. 2010;41(9):1951-1956.
  47. Davie SN, Grocott HP. Impact of extracranial contamination on regional cerebral oxygen saturation: a comparison of three cerebral oximetry technologies. *Anesthesiology*. 2012;116(4):834-840.
  48. Akça O, Sessler DI, DeLong D, Keijner R, Ganzel B, Doufas AG. Tissue Oxygenation Response to Mild Hypercapnia during Cardiopulmonary Bypass with Constant Pump Output. *British journal of anaesthesia*. 2006;96(6):708-714.

## Figures

**Figure 1.** CONSORT flow diagram

(Please refer to the attached diagram)

**Figure 2.** Percentage change in cerebral oximetry from baseline ( $\% \Delta rSO_2$ ) over time

(Please refer to the attached diagram)

## Figure Captions

**Figure 1:**

The progress of all participants through the trial displayed by the Consolidated Standards Of Reporting Trials (CONSORT) flow diagram.

**Figure 2:**

The solid lines represent mean percentage change, the shaded areas represent standard deviation, red represents the targeted mild hypercapnia (TMH) group, and blue represents the targeted normocapnia (TN) group.

Left: average percentage change of regional cerebral oxygen saturation from baseline on the left hemisphere

Right: average percentage change of regional cerebral oxygen saturation from baseline on the right hemisphere

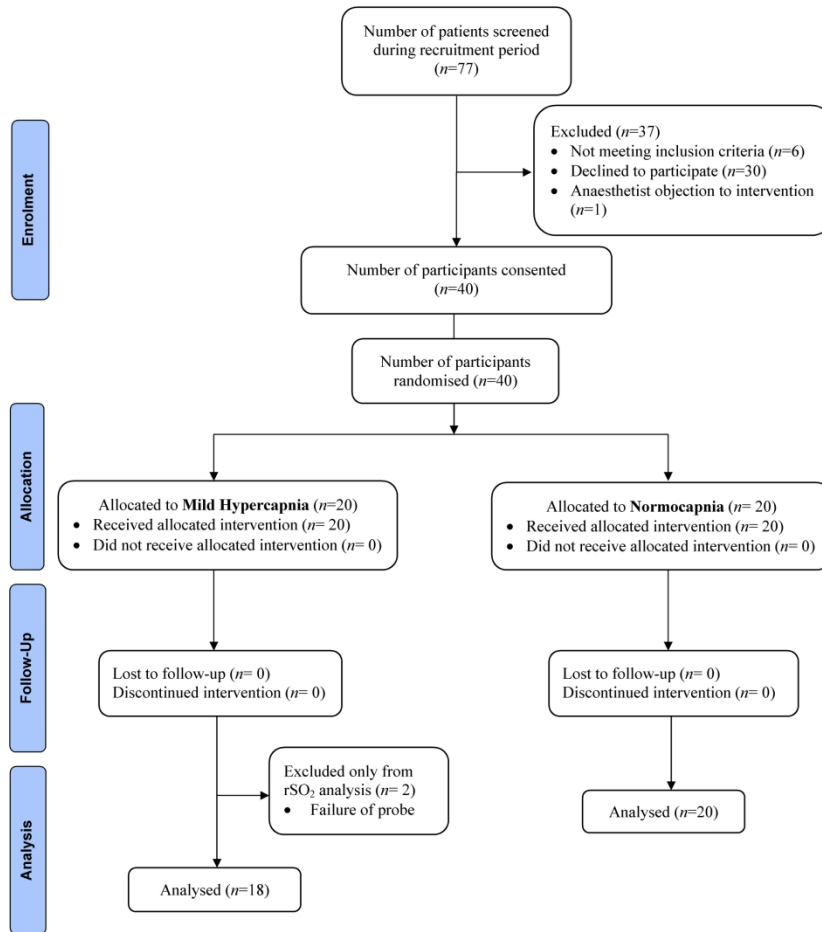

The progress of all participants through the trial displayed by the Consolidated Standards Of Reporting Trials (CONSORT) flow diagram.

203x287mm (300 x 300 DPI)

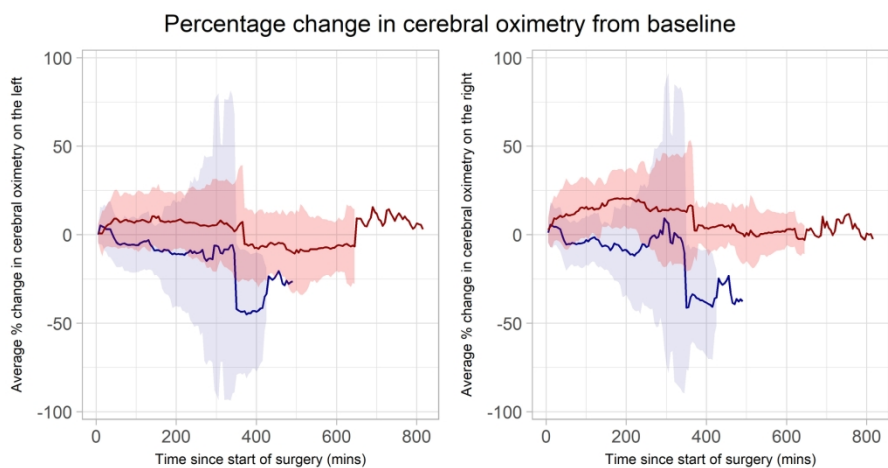

23  
24 The solid lines represent mean percentage change, the shaded areas represent standard deviation, red  
25 represents the targeted mild hypercapnia (TMH) group, and blue represents the targeted normocapnia (TN)  
26 group.

27 Left: average percentage change of regional cerebral oxygen saturation from baseline on the left  
28 hemisphere

29 Right: average percentage change of regional cerebral oxygen saturation from baseline on the right  
30 hemisphere

31  
32 177x93mm (300 x 300 DPI)

## Supplementary File 1

```
1
2
3
4
5
6
7
8 #-----
9 --
10 # TITLE: Create oximetry database from raw data files
11 # Author: Clarence Wong
12 # Last updated: 2/7/2017
13 # RStudio v. 1.0.136
14 #-----
15 --
16
17 library(readr)
18 require(lubridate)
19 require(TTR)
20 require(xts)
21 require(zoo)
22 library(reshape2)
23
24
25
26 #-----
27 --
28 # Read all data files and save as R object
29 #-----
30 --
31
32
33 master<-0
34 for (i in 1:8)
35 {
36   file <-
37   read.csv(paste("D:/SS/R_data/FINAL_oximetry_data/",as.character(i),".csv",sep=""))
38   master <- rbind(master,file)
39 }
40
41 master$date_time <- paste(master$Date, master$Time..GMT.)
42 master$date_time <- mdy_hms(master$date_time)
43 converted_master <- master[,c(58,3:57)]
44
45 save(converted_master,file = "converted_master.RData")
46
47
48 database_times <- read_csv("D:/SS/R_data/database_times.csv")
49 date_vector <- database_times[,c(1,5,6,7,11,12)]
50
51 date_vector$start_date_time <- mdy_hms(paste(date_vector`Date of
52 surgery`,date_vector`Monitoring Start`))
53 date_vector$end_date_time <- mdy_hms(paste(date_vector`Date of
54 surgery`,date_vector`Monitoring End`))
55
56
57
58
59
60
```

```

1
2
3
4 date_vector$surg_start_date_time <- mdy_hms(paste(date_vector`Date of
5 surgery`,date_vector`Start Time`))
6 date_vector$surg_end_date_time <- mdy_hms(paste(date_vector`Date of
7 surgery`,date_vector`Finish Time`))
8
9
10 converted_date_vector <- date_vector[,c(1,7,8,9,10)]
11
12 save(converted_date_vector,file = "converted_date_vector.RData")
13
14 rm(master,date_vector,file)
15
16
17 #-----
18 --
19 # 1. Convert data types and locate monitoring periods
20 # 2. Identify oximetry values at various time points
21 # 3. Compute percentage change from baseline
22 # 4. Identify and locate problematic data
23 #-----
24 --
25
26
27 minutes_taken_as_baseline <- 2.5
28 minutes_interval <- 5
29
30
31 secs_taken_as_baseline <- minutes_taken_as_baseline*60
32 secs_interval <- minutes_interval*60
33
34 load("converted_master.RData")
35 load("converted_date_vector.RData")
36 print("data loaded. check data version")
37
38
39 oximetry_L <-
40 as.numeric(levels(converted_master$RSO2_A1)[converted_master$RSO2_A1])
41 oximetry_R <-
42 as.numeric(levels(converted_master$RSO2_A2)[converted_master$RSO2_A2])
43 PSI <- as.numeric(levels(converted_master$PSI)[converted_master$PSI])
44
45
46 # monitoring duration
47 duration_mins <-
48 difftime(converted_date_vector$end_date_time,converted_date_vector$start_date_time,uni
49 ts = "mins")
50 duration_secs <-
51 difftime(converted_date_vector$end_date_time,converted_date_vector$start_date_time,uni
52 ts = "secs")
53
54
55 locate_start = seq(-1,-1,length.out = dim(converted_date_vector)[1])
56
57
58
59
60

```

```

1
2
3
4
5 for (i in 1:dim(converted_date_vector)[1]){
6   if(length(which(converted_date_vector$start_date_time[i]==converted_master$date_time))
7     ==1)
8     {
9       locate_start[i] <-
10      which(converted_date_vector$start_date_time[i]==converted_master$date_time)
11    }
12  }
13 }
14
15
16 # create final_oximetry data frame
17 final_oximetry <- data.frame()
18 baseline_L_mu<-baseline_L_std<-baseline_L_N<-baseline_R_mu<-baseline_R_std<-
19 baseline_R_N<-rep(9999,dim(converted_date_vector)[1])
20 num_time_pts <- rep(1,40)
21
22 for(j in 1:dim(converted_date_vector)[1])
23 {
24   # for each patient
25   if(locate_start[j]==-1)
26   {
27     p_id <- j
28     time_id<-minute_from_baseline<-percentage_total_monitoring_period<-L_delta<-
29     L_mu<-L_sig<-L_N<-R_delta<-R_mu<-R_sig<-R_N<-PSI_mu<-9999
30
31
32
33   } else{
34
35     locate_baseline <- locate_start[j]+secs_taken_as_baseline/2
36     locate_times <- seq(0,0)
37     num_measurements <- (as.numeric(duration_secs)[j]-
38 secs_taken_as_baseline)%/%secs_interval + 1
39     num_time_pts[j] <- num_measurements
40     locate_times[1] <- locate_baseline
41     locate_times[2] <- locate_times[1] + secs_interval/2
42     locate_times[2:num_measurements]<-
43 seq(locate_times[2],locate_start[j]+as.numeric(duration_secs[j])/2,by=secs_interval/2)
44     locate_times[num_measurements+1]<-locate_start[j]+as.numeric(duration_secs[j])/2
45
46
47     baseline_L_mu[j] <- mean(oximetry_L[locate_start[j]:(locate_baseline-1)],na.rm =
48 TRUE)
49     baseline_L_std[j] <- sd(oximetry_L[locate_start[j]:(locate_baseline-1)],na.rm = TRUE)
50     baseline_L_N[j] <- length(oximetry_L[locate_start[j]:(locate_baseline-1)])-
51 sum(is.na(oximetry_L[locate_start[j]:(locate_baseline-1)]))
52
53
54
55
56
57
58
59
60

```

```

1
2
3
4     baseline_R_mu[j] <- mean(oximetry_R[locate_start[j]:(locate_baseline-1)],na.rm =
5 TRUE)
6     baseline_R_std[j] <- sd(oximetry_R[locate_start[j]:(locate_baseline-1)],na.rm = TRUE)
7     baseline_R_N[j] <- length(oximetry_R[locate_start[j]:(locate_baseline-1)])-
8 sum(is.na(oximetry_R[locate_start[j]:(locate_baseline-1)]))
9
10
11     L_delta <- L_mu <- L_sig <- L_N <- R_delta <- R_mu <- R_sig <- R_N <- PSI_mu <-
12 seq(0,0)
13
14     for (k in 1:num_measurements)
15     {
16         L_mu[k] <- mean(oximetry_L[locate_times[k]:(locate_times[k+1]-1)],na.rm = TRUE)
17         L_sig[k] <- sd(oximetry_L[locate_times[k]:(locate_times[k+1]-1)],na.rm = TRUE)
18         L_N[k] <- length(oximetry_L[locate_times[k]:(locate_times[k+1]-1)])-
19 sum(is.na(oximetry_L[locate_times[k]:(locate_times[k+1]-1)]))
20
21         R_mu[k] <- mean(oximetry_R[locate_times[k]:(locate_times[k+1]-1)],na.rm = TRUE)
22         R_sig[k] <- sd(oximetry_R[locate_times[k]:(locate_times[k+1]-1)],na.rm = TRUE)
23         R_N[k] <- length(oximetry_R[locate_times[k]:(locate_times[k+1]-1)])-
24 sum(is.na(oximetry_R[locate_times[k]:(locate_times[k+1]-1)]))
25
26         PSI_mu[k] <- mean(PSI[locate_times[k]:(locate_times[k+1]-1)],na.rm = TRUE)
27     }
28
29     L_delta <- (L_mu/baseline_L_mu[j] - 1)*100
30     R_delta <- (R_mu/baseline_R_mu[j] - 1)*100
31
32     time_id <- 1:num_measurements
33     minute_from_baseline <- c(seq(minutes_interval,minutes_interval*(num_measurements-
34 1), by = minutes_interval),as.numeric(duration_mins[j]-minutes_taken_as_baseline))
35     p_id <- rep(j,num_measurements)
36     percentage_total_monitoring_period <-
37 ((minute_from_baseline*60+secs_taken_as_baseline)/as.numeric(duration_secs[j]))*100
38
39     }
40
41     temp_df <-
42 data.frame(p_id,time_id,minute_from_baseline,percentage_total_monitoring_period,L_delt
43 a,L_mu,L_sig,L_N,R_delta,R_mu,R_sig,R_N,PSI_mu)
44     final_oximetry <- rbind(final_oximetry,temp_df)
45     rm(temp_df)
46
47     }
48
49     missing_L <- unique(final_oximetry$p_id[is.na(final_oximetry$L_delta)])
50
51
52
53
54
55
56
57
58
59
60

```



```
1
2
3
4 missing_R <- unique(final_oximetry$p_id[is.na(final_oximetry$R_delta)])
5 percentage_total_missing_L <-
6 100*(rle(final_oximetry$p_id[is.na(final_oximetry$L_delta)])$lengths) /
7 (num_time_pts[unique(final_oximetry$p_id[is.na(final_oximetry$L_delta)])])
8 percentage_total_missing_R <-
9 100*(rle(final_oximetry$p_id[is.na(final_oximetry$R_delta)])$lengths) /
10 (num_time_pts[unique(final_oximetry$p_id[is.na(final_oximetry$R_delta)])])
11 missing_data <- unique(final_oximetry$p_id[(final_oximetry$L_delta==9999)])
12 missing_data <- missing_data[!is.na(missing_data)]
13 missing_PSI <- unique(final_oximetry$p_id[is.na(final_oximetry$PSI_mu)])
14 percentage_total_missing_PSI <-
15 100*(rle(final_oximetry$p_id[is.na(final_oximetry$PSI_mu)])$lengths) /
16 (num_time_pts[unique(final_oximetry$p_id[is.na(final_oximetry$PSI_mu)])])
17
18
19
20 print("there are missing delta oximetry values in the following patients")
21 print(missing_L)
22 print(percentage_total_missing_L)
23
24
25 print(missing_R)
26 print(percentage_total_missing_R)
27
28
29 print(missing_data)
30
31 print("there are missing PSI values in the following patients")
32 print(missing_PSI)
33 print(percentage_total_missing_PSI)
34
35 other_data <-
36 data.frame(num_time_pts,baseline_L_mu,baseline_L_std,baseline_L_N,baseline_R_mu,
37 baseline_R_std,baseline_R_N)
38 other_data[is.na(other_data)]<-9999
39 save(other_data, file="other_data.RData")
40
41
42 final_oximetry[is.na(final_oximetry)]<-9999
43 save(final_oximetry,file = "final_oximetry.RData")
44
45
46
47 #-----
48 --
49 # 1. Convert baseline characteristic database from wide to long format
50 # 2. Incorporating oximetry data in the database with time as a nested data in the hierarchy
51 # 3. Create final database
52 #-----
53
54 --
```

```
1
2
3
4 load("final_oximetry.RData")
5 load("other_data.RData")
6 print("check if final oximetry is latest")
7
8
9 baseline_results <- read.csv("D:/SS/R_data/FINAL_oximetry_data/all_baseline.csv",
10 sep=",", stringsAsFactors=FALSE)
11
12 baseline_results$baseline_L_mu <- other_data$baseline_L_mu
13 baseline_results$baseline_L_std <- other_data$baseline_L_std
14 baseline_results$baseline_L_N <- other_data$baseline_L_N
15 baseline_results$baseline_R_mu <- other_data$baseline_R_mu
16 baseline_results$baseline_R_std <- other_data$baseline_R_std
17 baseline_results$baseline_R_N <- other_data$baseline_R_N
18
19
20 baseline_results$P_id <- index(baseline_results)
21
22 baseline_results[baseline_results == "#N/A"]<-9999
23
24
25 #generate baseline_results with the same number of rows as final oximetry
26 baseline_results <- baseline_results[rep(seq_len((40)),num_time_pts),]
27
28
29
30 all_results <- cbind(baseline_results,final_oximetry)
31 if (sum(1*(all_results$P_id != all_results$p_id))==0)
32 {
33   all_results <- all_results[,c(which(colnames(all_results)=="p_id"),1:109,112:122)]
34 }
35
36 save(all_results,file = "all_results.RData")
37
38 #UNCOMMENT TO WRITE CSV
39 #-----
40 write.csv(all_results, file="all_results.csv")
41
42
43
44
45
46
47
48
49
50
51
52
53
54
55
56
57
58
59
```

## Supplementary File 2

```

#-----
# TITLE: Create baseline patient and surgical characteristics table, oximetry table, and
oximetry graphs
# Author: Clarence Wong
# Last updated: 2/7/2017
# RStudio v. 1.0.136
#-----
-----

library(readr)
require(lubridate)
require(TTR)
require(xts)
require(zoo)
require(tableone)
require(ggplot2)
library(grid)
require(gridExtra)
require(quantreg)

#-----
# 1. Create summary statistics for baseline characteristics
# 2. Perform statistical analysis on secondary outcomes. e.g post-operative delirium
# 3. Export tables in csv files
# Requires baseline characteristic and baseline oximetry data.
#-----
-----

baseline_db <- read.csv("D:/SS/R_data/baseline/all_baseline.csv", sep=",",
stringsAsFactors=TRUE)
load("other_data.RData")

other_data <- other_data[-c(1,2),]

baseline_db$baseline_L_mu <- other_data$baseline_L_mu
baseline_db$baseline_L_std <- other_data$baseline_L_std
baseline_db$baseline_L_N <- other_data$baseline_L_N
baseline_db$baseline_R_mu <- other_data$baseline_R_mu
baseline_db$baseline_R_std <- other_data$baseline_R_std
baseline_db$baseline_R_N <- other_data$baseline_R_N

baseline_db$P_id <- index(baseline_db)

```

```

1
2
3
4 baseline_db[baseline_db == "#N/A"]<-NA
5 baseline_db[baseline_db == 9999]<-NA
6 baseline_db$pCO2_2<-
7 as.numeric(levels(baseline_db$pCO2_2))[baseline_db$pCO2_2]
8 baseline_db$BMI<-as.numeric(levels(baseline_db$BMI))[baseline_db$BMI]
9 vars <-
10 c("Gender","Age","Weight","BMI","ASA","Diabetes","COPD","Malignancy","Other_C
11 omorbidities",
12 "Surgery_type","Duration_Surgery_Minutes","baseline_L_mu","baseline_R_mu")
13
14 factorVars <- c("ASA","Diabetes","COPD","Malignancy","Other_Comorbidities")
15 Tableone <- CreateTableOne(vars,"Group",baseline_db,factorVars)
16
17
18
19
20 baseline_db$LOS<-as.numeric(levels(baseline_db$LOS))[baseline_db$LOS]
21 baseline_db$pH_2<-as.numeric(levels(baseline_db$pH_2))[baseline_db$pH_2]
22 baseline_db$HCO3._2<-
23 as.numeric(levels(baseline_db$HCO3._2))[baseline_db$HCO3._2]
24 baseline_db$Base_excess_2<-
25 as.numeric(levels(baseline_db$Base_excess_2))[baseline_db$Base_excess_2]
26 baseline_db$Potassium_2<-
27 as.numeric(levels(baseline_db$Potassium_2))[baseline_db$Potassium_2]
28 baseline_db$Total_Hb_2<-
29 as.numeric(levels(baseline_db$Total_Hb_2))[baseline_db$Total_Hb_2]
30
31
32
33 baseline_db$pH<-apply(baseline_db[,c("pH_1","pH_2")],1,mean,na.rm=TRUE)
34 baseline_db$pCO2<-
35 apply(baseline_db[,c("pCO2_1","pCO2_2")],1,mean,na.rm=TRUE)
36 baseline_db$HCO3.<-
37 apply(baseline_db[,c("HCO3._1","HCO3._2")],1,mean,na.rm=TRUE)
38 baseline_db$Base_excess<-
39 apply(baseline_db[,c("Base_excess_1","Base_excess_2")],1,mean,na.rm=TRUE)
40 baseline_db$Potassium<-
41 apply(baseline_db[,c("Potassium_1","Potassium_2")],1,mean,na.rm=TRUE)
42 baseline_db$Total_Hb<-
43 apply(baseline_db[,c("Total_Hb_1","Total_Hb_2")],1,mean,na.rm=TRUE)
44
45
46
47 vars_2 <-
48 c("Surgery_type","Duration_Surgery_Minutes","baseline_L_mu","baseline_R_mu","L
49 OS",
50
51 "pH","pCO2","HCO3.","Base_excess","Potassium","Total_Hb","post_op_delirium")
52 factorVars_2 <- c("post_op_delirium")
53 Tabletwo <- CreateTableOne(vars_2,"Group",baseline_db,factorVars_2,argsExact =
54 "post_op_delirium")
55
56
57 print(Tabletwo,exact = "post_op_delirium",nonnormal =
58 c("Duration_Surgery_Minutes","baseline_L_mu","baseline_R_mu",
59
60

```

```

1
2
3
4
5 "LOS", "pH", "pCO2", "HCO3.", "Base_excess", "Potassium", "Total_Hb"))
6
7
8
9 write.csv(print(Tabletwo, exact = "post_op_delirium", nonnormal =
10 c("Duration_Surgery_Minutes", "baseline_L_mu",
11
12 "baseline_R_mu", "LOS", "pH", "pCO2", "HCO3.",
13 "Base_excess", "Potassium", "Total_Hb")),
14 "Table_Two.csv")
15
16
17 #-----
18 -----
19 # 1. Create summary statistics for percentage change of regional cerebral oxygen
20 saturation
21 # 2. Create plots for regional cerebral oxygen saturation over time
22 # 3. Export oximetry tables in csv files
23 # Requires baseline characteristic and baseline oximetry data.
24 #-----
25 -----
26
27
28 #-----
29 -----
30
31 # Normocapnic group
32
33 plot_db <- read.csv("D:/SS/R_data/oximetry/MASTER_results_deleted_missing.csv",
34 sep=",", stringsAsFactors=TRUE)
35
36 plot_db[plot_db == "#N/A"] <- NA
37 plot_db[plot_db == 9999] <- NA
38
39
40 normocapnia <- subset(plot_db, Group %in% 0)
41 hypercapnia <- subset(plot_db, Group %in% 1)
42
43 normo_plot <- ggplot(normocapnia, aes(x=minute_from_baseline, y=L_delta,
44 group=p_id)) + geom_line() + geom_point()+
45 ggtitle("normocapnia: L delta")+ xlab("Time since start of operation (mins)") +
46 ylab("% change in oximetry from baseline")
47
48
49 hyper_plot <- ggplot(hypercapnia, aes(x=minute_from_baseline, y=L_delta,
50 group=p_id)) + geom_line() + geom_point()+
51 ggtitle("hypercapnia: L delta")+ xlab("Time since start of operation (mins)") + ylab("%
52 change in oximetry from baseline")
53
54
55 means <- tapply(normocapnia$L_delta, normocapnia$time_id, function(x) mean(x, na.rm
56 = TRUE))
57 stdevs <- tapply(normocapnia$L_delta, normocapnia$time_id, function(x) sd(x, na.rm =
58 TRUE))
59
60

```

```

1
2
3
4 N <- tapply(normocapnia$L_delta,normocapnia$time_id,function(x)
5 length(x[!is.na(x)]))
6
7
8 normo_df_L <- data.frame(means,stdevs)
9 times<- index(normo_df_L)*5
10 normo_df_L <- data.frame(means,stdevs,N, times)
11 total_normo_L <- ggplot(normo_df_L, aes(x=times, y=means)) +
12 geom_line(colour="blue4") +
13   geom_ribbon(normo_df_L,mapping = aes(x=times,
14 ymax=means+stdevs,ymin=means-stdevs),fill="blue4",alpha=0.1)
15
16
17 means <- tapply(normocapnia$R_delta,normocapnia$time_id,function(x) mean(x,
18 na.rm = TRUE))
19 stdevs <- tapply(normocapnia$R_delta,normocapnia$time_id,function(x) sd(x, na.rm =
20 TRUE))
21 N <- tapply(normocapnia$R_delta,normocapnia$time_id,function(x)
22 length(x[!is.na(x)]))
23
24
25 normo_df_R <- data.frame(means,stdevs)
26 times<- index(normo_df_R)*5
27 normo_df_R <- data.frame(means,stdevs,N, times)
28 total_normo_R <- ggplot(normo_df_R, aes(x=times, y=means)) +
29 geom_line(colour="blue4") +
30   geom_ribbon(normo_df_R,mapping = aes(x=times,
31 ymax=means+stdevs,ymin=means-stdevs),fill="blue4",alpha=0.1)
32
33
34 #-----
35 -----
36 # Hypercapnic group
37
38
39 means <- tapply(hypercapnia$L_delta,hypercapnia$time_id,function(x) mean(x, na.rm
40 = TRUE))
41 stdevs <- tapply(hypercapnia$L_delta,hypercapnia$time_id,function(x) sd(x, na.rm =
42 TRUE))
43 N <- tapply(hypercapnia$L_delta,hypercapnia$time_id,function(x) length(x[!is.na(x)]))
44
45
46 hyper_df_L <- data.frame(means,stdevs)
47 times<- index(hyper_df_L)*5
48 hyper_df_L <- data.frame(means,stdevs,N, times)
49 total_hyper_L <- ggplot(hyper_df_L, aes(x=times, y=means))
50
51
52 means <- tapply(hypercapnia$R_delta,hypercapnia$time_id,function(x) mean(x, na.rm
53 = TRUE))
54 stdevs <- tapply(hypercapnia$R_delta,hypercapnia$time_id,function(x) sd(x, na.rm =
55 TRUE))
56 N <- tapply(hypercapnia$R_delta,hypercapnia$time_id,function(x) length(x[!is.na(x)]))
57
58
59 hyper_df_R <- data.frame(means,stdevs)
60

```

```

1
2
3
4 times<- index(hyper_df_R)*5
5 hyper_df_R <- data.frame(means,stdevs,N, times)
6 total_hyper_R <- ggplot(hyper_df_R, aes(x=times, y=means))
7
8
9 total_L <- total_normo_L +
10   geom_ribbon(hyper_df_L,mapping = aes(x=times, ymax=means+stdevs,ymin=means-
11   stdevs),fill="red2",alpha=0.2) +
12   geom_line(hyper_df_L,mapping = aes(x=times, y=means),colour="red4") +
13   theme_light() +
14   xlab("Time since start of surgery (mins)")+ ylab("Average % change in cerebral
15   oximetry on the left") +
16   theme(axis.title.y = element_text(size = rel(0.65), angle = 90)) +
17   theme(axis.title.x = element_text(size = rel(0.65), angle = 00))
18
19
20 total_R <- total_normo_R +
21   geom_ribbon(hyper_df_R,mapping = aes(x=times, ymax=means+stdevs,ymin=means-
22   stdevs),fill="red2",alpha=0.2) +
23   geom_line(hyper_df_R,mapping = aes(x=times, y=means),colour="red4")+
24   theme_light() +
25   xlab("Time since start of surgery (mins)")+ ylab("Average % change in cerebral
26   oximetry on the right") +
27   scale_color_manual(values=c("red4","blue4"))+
28   theme(axis.title.y = element_text(size = rel(0.65), angle = 90)) +
29   theme(axis.title.x = element_text(size = rel(0.65), angle = 00))
30
31
32
33 #tiff('oximetry_graph_high_res.tiff', units="in", width=7, height=3.6667, res=600,
34   compression = 'lzw')
35
36
37 grid.arrange(total_L, total_R, ncol = 2, top=textGrob("Percentage change in cerebral
38   oximetry from baseline",
39   gp=gpar(fontsize=11,fontfamily="Times")),
40   vp=viewport(width=0.9, height=0.9))
41
42 #insert ggplot code
43 #dev.off()
44
45 temp_hyper_L <- t(paste(round(hyper_df_L$mean,1)," (",
46   round(hyper_df_L$stdev,1),")", " {" , hyper_df_L$N, " }", sep = ""))
47 temp_normo_L <- t(paste(round(normo_df_L$mean,1)," (",
48   round(normo_df_L$stdev,1),")", " {" , normo_df_L$N, " }", sep = ""))
49
50
51 temp_hyper_R <- t(paste(round(hyper_df_R$mean,1)," (",
52   round(hyper_df_R$stdev,1),")", " {" , hyper_df_R$N, " }", sep = ""))
53 temp_normo_R <- t(paste(round(normo_df_R$mean,1)," (",
54   round(normo_df_R$stdev,1),")", " {" , normo_df_R$N, " }", sep = ""))
55
56
57 write.csv( temp_normo_L , "normo_df_L.csv")
58 write.csv( temp_normo_R , "normo_df_R.csv")
59
60

```

```
1  
2  
3  
4 write.csv( temp_hyper_L , "hyper_df_L.csv")  
5 write.csv( temp_hyper_R , "hyper_df_R.csv")  
6  
7  
8  
9  
10  
11  
12  
13  
14  
15  
16  
17  
18  
19  
20  
21  
22  
23  
24  
25  
26  
27  
28  
29  
30  
31  
32  
33  
34  
35  
36  
37  
38  
39  
40  
41  
42  
43  
44  
45  
46  
47  
48  
49  
50  
51  
52  
53  
54  
55  
56  
57  
58  
59  
60
```

For peer review only



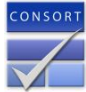

## CONSORT 2010 checklist of information to include when reporting a randomised trial\*

| Section/Topic                    | Item No | Checklist item                                                                                                                                                                              | Reported on page No |
|----------------------------------|---------|---------------------------------------------------------------------------------------------------------------------------------------------------------------------------------------------|---------------------|
| <b>Title and abstract</b>        |         |                                                                                                                                                                                             |                     |
|                                  | 1a      | Identification as a randomised trial in the title                                                                                                                                           | 1                   |
|                                  | 1b      | Structured summary of trial design, methods, results, and conclusions (for specific guidance see CONSORT for abstracts)                                                                     | 2                   |
| <b>Introduction</b>              |         |                                                                                                                                                                                             |                     |
| Background and objectives        | 2a      | Scientific background and explanation of rationale                                                                                                                                          | 5                   |
|                                  | 2b      | Specific objectives or hypotheses                                                                                                                                                           | 5                   |
| <b>Methods</b>                   |         |                                                                                                                                                                                             |                     |
| Trial design                     | 3a      | Description of trial design (such as parallel, factorial) including allocation ratio                                                                                                        | 6                   |
|                                  | 3b      | Important changes to methods after trial commencement (such as eligibility criteria), with reasons                                                                                          | N/A                 |
| Participants                     | 4a      | Eligibility criteria for participants                                                                                                                                                       | 6                   |
|                                  | 4b      | Settings and locations where the data were collected                                                                                                                                        | 6                   |
| Interventions                    | 5       | The interventions for each group with sufficient details to allow replication, including how and when they were actually administered                                                       | 6-8                 |
| Outcomes                         | 6a      | Completely defined pre-specified primary and secondary outcome measures, including how and when they were assessed                                                                          | 7-9                 |
|                                  | 6b      | Any changes to trial outcomes after the trial commenced, with reasons                                                                                                                       | N/A                 |
| Sample size                      | 7a      | How sample size was determined                                                                                                                                                              | 10                  |
|                                  | 7b      | When applicable, explanation of any interim analyses and stopping guidelines                                                                                                                | N/A                 |
| <b>Randomisation:</b>            |         |                                                                                                                                                                                             |                     |
| Sequence generation              | 8a      | Method used to generate the random allocation sequence                                                                                                                                      | 6                   |
|                                  | 8b      | Type of randomisation; details of any restriction (such as blocking and block size)                                                                                                         | 6                   |
| Allocation concealment mechanism | 9       | Mechanism used to implement the random allocation sequence (such as sequentially numbered containers), describing any steps taken to conceal the sequence until interventions were assigned | 6                   |
| Implementation                   | 10      | Who generated the random allocation sequence, who enrolled participants, and who assigned participants to interventions                                                                     | 6-7                 |
| Blinding                         | 11a     | If done, who was blinded after assignment to interventions (for example, participants, care providers, those                                                                                | 6-7                 |

|    |                          |                                                             |                                                                                                                  |          |
|----|--------------------------|-------------------------------------------------------------|------------------------------------------------------------------------------------------------------------------|----------|
| 1  |                          | assessing outcomes) and how                                 |                                                                                                                  |          |
| 2  | 11b                      | If relevant, description of the similarity of interventions | 9                                                                                                                |          |
| 3  | Statistical methods      | 12a                                                         | Statistical methods used to compare groups for primary and secondary outcomes                                    | 10-11    |
| 4  |                          | 12b                                                         | Methods for additional analyses, such as subgroup analyses and adjusted analyses                                 | 10-11    |
| 5  |                          |                                                             |                                                                                                                  |          |
| 6  | <b>Results</b>           |                                                             |                                                                                                                  |          |
| 7  | Participant flow (a      | 13a                                                         | For each group, the numbers of participants who were randomly assigned, received intended treatment, and         | 12       |
| 8  | diagram is strongly      |                                                             | were analysed for the primary outcome                                                                            |          |
| 9  | recommended)             | 13b                                                         | For each group, losses and exclusions after randomisation, together with reasons                                 | 12       |
| 10 | Recruitment              | 14a                                                         | Dates defining the periods of recruitment and follow-up                                                          | 6        |
| 11 |                          | 14b                                                         | Why the trial ended or was stopped                                                                               | N/A      |
| 12 | Baseline data            | 15                                                          | A table showing baseline demographic and clinical characteristics for each group                                 | 12-13    |
| 13 | Numbers analysed         | 16                                                          | For each group, number of participants (denominator) included in each analysis and whether the analysis was      | 12       |
| 14 |                          |                                                             | by original assigned groups                                                                                      |          |
| 15 | Outcomes and             | 17a                                                         | For each primary and secondary outcome, results for each group, and the estimated effect size and its            | 14,16,17 |
| 16 | estimation               |                                                             | precision (such as 95% confidence interval)                                                                      |          |
| 17 |                          | 17b                                                         | For binary outcomes, presentation of both absolute and relative effect sizes is recommended                      | 14       |
| 18 | Ancillary analyses       | 18                                                          | Results of any other analyses performed, including subgroup analyses and adjusted analyses, distinguishing       | 16       |
| 19 |                          |                                                             | pre-specified from exploratory                                                                                   |          |
| 20 | Harms                    | 19                                                          | All important harms or unintended effects in each group (for specific guidance see CONSORT for harms)            | 21       |
| 21 |                          |                                                             |                                                                                                                  |          |
| 22 | <b>Discussion</b>        |                                                             |                                                                                                                  |          |
| 23 | Limitations              | 20                                                          | Trial limitations, addressing sources of potential bias, imprecision, and, if relevant, multiplicity of analyses | 22-23    |
| 24 | Generalisability         | 21                                                          | Generalisability (external validity, applicability) of the trial findings                                        | 21-22    |
| 25 | Interpretation           | 22                                                          | Interpretation consistent with results, balancing benefits and harms, and considering other relevant evidence    | 19-21    |
| 26 |                          |                                                             |                                                                                                                  |          |
| 27 | <b>Other information</b> |                                                             |                                                                                                                  |          |
| 28 | Registration             | 23                                                          | Registration number and name of trial registry                                                                   | 3        |
| 29 | Protocol                 | 24                                                          | Where the full trial protocol can be accessed, if available                                                      | 3        |
| 30 | Funding                  | 25                                                          | Sources of funding and other support (such as supply of drugs), role of funders                                  | 4        |

36  
37 \*We strongly recommend reading this statement in conjunction with the CONSORT 2010 Explanation and Elaboration for important clarifications on all the items. If relevant, we also  
38 recommend reading CONSORT extensions for cluster randomised trials, non-inferiority and equivalence trials, non-pharmacological treatments, herbal interventions, and pragmatic trials.  
39 Additional extensions are forthcoming: for those and for up to date references relevant to this checklist, see [www.consort-statement.org](http://www.consort-statement.org).  
40  
41  
42

# BMJ Open

## A randomised controlled trial to investigate the relationship between mild hypercapnia and cerebral oxygen saturation in patients undergoing major surgery

|                                 |                                                                                                                                                                                                                                                                                                                                                                                                                                                                                                                                                                                                                                                                                                                                                                                                      |
|---------------------------------|------------------------------------------------------------------------------------------------------------------------------------------------------------------------------------------------------------------------------------------------------------------------------------------------------------------------------------------------------------------------------------------------------------------------------------------------------------------------------------------------------------------------------------------------------------------------------------------------------------------------------------------------------------------------------------------------------------------------------------------------------------------------------------------------------|
| Journal:                        | <i>BMJ Open</i>                                                                                                                                                                                                                                                                                                                                                                                                                                                                                                                                                                                                                                                                                                                                                                                      |
| Manuscript ID                   | bmjopen-2019-029159.R2                                                                                                                                                                                                                                                                                                                                                                                                                                                                                                                                                                                                                                                                                                                                                                               |
| Article Type:                   | Original research                                                                                                                                                                                                                                                                                                                                                                                                                                                                                                                                                                                                                                                                                                                                                                                    |
| Date Submitted by the Author:   | 04-Nov-2019                                                                                                                                                                                                                                                                                                                                                                                                                                                                                                                                                                                                                                                                                                                                                                                          |
| Complete List of Authors:       | Wong, Clarence; Austin Hospital, Department of Anaesthesia<br>Churilov, Leonid; The Florey Institute of Neuroscience and Mental Health; University of Melbourne<br>Cowie, Dean; Austin Hospital, Department of Anaesthesia<br>Tan, Chong; Austin Hospital, Department of Anaesthesia<br>Hu, Raymond; Austin Hospital, Department of Anaesthesia<br>Tremewen, David; Austin Hospital, Department of Anaesthesia<br>Pearce, Brett; Austin Hospital, Department of Anaesthesia<br>Pillai, Param; Austin Hospital, Department of Anaesthesia<br>Karalipillai, Dharshi; Austin Hospital, Department of Anaesthesia<br>Bellomo, Rinaldo; Austin Hospital, Department of Intensive Care; University of Melbourne<br>Weinberg, Laurence; Austin Hospital, Department of Anaesthesia; University of Melbourne |
| <b>Primary Subject Heading</b>: | Anaesthesia                                                                                                                                                                                                                                                                                                                                                                                                                                                                                                                                                                                                                                                                                                                                                                                          |
| Secondary Subject Heading:      | Evidence based practice, Health informatics                                                                                                                                                                                                                                                                                                                                                                                                                                                                                                                                                                                                                                                                                                                                                          |
| Keywords:                       | hypercapnia, oximetry, Spectroscopy, Near-Infrared, Respiration, Artificial, Delirium                                                                                                                                                                                                                                                                                                                                                                                                                                                                                                                                                                                                                                                                                                                |
|                                 |                                                                                                                                                                                                                                                                                                                                                                                                                                                                                                                                                                                                                                                                                                                                                                                                      |

SCHOLARONE™  
Manuscripts



I, the Submitting Author has the right to grant and does grant on behalf of all authors of the Work (as defined in the below author licence), an exclusive licence and/or a non-exclusive licence for contributions from authors who are: i) UK Crown employees; ii) where BMJ has agreed a CC-BY licence shall apply, and/or iii) in accordance with the terms applicable for US Federal Government officers or employees acting as part of their official duties; on a worldwide, perpetual, irrevocable, royalty-free basis to BMJ Publishing Group Ltd ("BMJ") its licensees and where the relevant Journal is co-owned by BMJ to the co-owners of the Journal, to publish the Work in this journal and any other BMJ products and to exploit all rights, as set out in our [licence](#).

The Submitting Author accepts and understands that any supply made under these terms is made by BMJ to the Submitting Author unless you are acting as an employee on behalf of your employer or a postgraduate student of an affiliated institution which is paying any applicable article publishing charge ("APC") for Open Access articles. Where the Submitting Author wishes to make the Work available on an Open Access basis (and intends to pay the relevant APC), the terms of reuse of such Open Access shall be governed by a Creative Commons licence – details of these licences and which [Creative Commons](#) licence will apply to this Work are set out in our licence referred to above.

Other than as permitted in any relevant BMJ Author's Self Archiving Policies, I confirm this Work has not been accepted for publication elsewhere, is not being considered for publication elsewhere and does not duplicate material already published. I confirm all authors consent to publication of this Work and authorise the granting of this licence.

1  
2  
3  
4  
5 **A randomised controlled trial to investigate the relationship between mild hypercapnia**  
6 **and cerebral oxygen saturation in patients undergoing major surgery**  
7  
8  
9

10 **Authors:** Clarence Wong<sup>1,2</sup>, Leonid Churilov<sup>2,3</sup>, Dean Cowie<sup>1</sup>, Chong Tan<sup>1</sup>, Raymond Hu<sup>1</sup>,  
11 David Tremewen<sup>1</sup>, Brett Pearce<sup>1</sup>, Param Pillai<sup>1</sup>, Dharshi Karalipillai<sup>1</sup>, Rinaldo Bellomo<sup>1,2</sup>,  
12 Laurence Weinberg<sup>1,2</sup>  
13

- 14  
15 1. Department of Anaesthesia, Austin Hospital, Heidelberg, Victoria, Australia;  
16  
17 2. University of Melbourne, Parkville, Victoria, Australia;  
18  
19 3. The Florey Institute of Neuroscience and Mental Health, Heidelberg, Victoria, Australia  
20  
21  
22  
23

24 **Correspondence**

25 A/Prof Laurence Weinberg

26 Department of Anaesthesia, Austin Hospital

27 145 Studley Road, Heidelberg, Victoria 3084, Australia

28 Phone number: (61) 03 94965000

29 Email: [laurence.weinberg@austin.org.au](mailto:laurence.weinberg@austin.org.au)  
30  
31  
32  
33  
34  
35  
36

37 **Word Count**

38 Abstract: 304

39 Introduction: 307

40 Methods: 2035

41 Results: 802

42 Discussion: 1671

43 Conclusion: 43

44 Body text: 4858  
45  
46  
47  
48  
49  
50  
51  
52  
53  
54  
55  
56  
57  
58  
59  
60

## **Abstract**

**Objectives:** The effects of hypercapnia on regional cerebral oxygen saturation (rSO<sub>2</sub>) during surgery are unclear. We conducted a randomised controlled trial to investigate the relationship between mild hypercapnia and rSO<sub>2</sub>. We hypothesised that, compared with targeted normocapnia (TN), targeted mild hypercapnia (TMH) during major surgery would increase rSO<sub>2</sub>.

**Design:** A prospective, randomised, controlled trial in adult participants undergoing elective major surgery.

**Setting:** A single tertiary centre in Heidelberg, Victoria, Australia.

**Participants:** 40 participants were randomised to either a TMH or TN group (20 to each).

**Interventions:** TMH (partial pressure of carbon dioxide in arterial blood, PaCO<sub>2</sub>, 45-55 mmHg) or TN (PaCO<sub>2</sub> 35-40 mmHg) was delivered via controlled ventilation throughout surgery.

**Primary and secondary outcome measures:** The primary endpoint was the absolute difference between the two groups in percentage change in rSO<sub>2</sub> from baseline to completion of surgery. Secondary endpoints included intra-operative pH, bicarbonate concentration, base excess, serum potassium concentration, incidence of postoperative delirium, and length of stay (LOS) in hospital.

**Results:** The absolute difference between the two groups in percentage change in rSO<sub>2</sub> from the baseline to the completion of surgery was 19.0% higher in both hemispheres with TMH ( $P<0.001$ ). On both sides, the percentage change in rSO<sub>2</sub> was greater in the TMH group than the TN group throughout the duration of surgery. The difference between the groups became more noticeable over time. Furthermore, postoperative delirium was higher in the TN group (risk difference 0.3, 95% CI [0.1 to 0.5],  $P=0.02$ ). Length of stay was similar between groups (5 days vs. 5 days;  $P=0.99$ ).

1  
2  
3 **Conclusion:** TMH was associated with a stable increase in rSO<sub>2</sub> from the baseline, while TN  
4 was associated with a decrease in rSO<sub>2</sub> in both hemispheres in patients undergoing major  
5 surgery. This resulted in a clear separation of percentage change in rSO<sub>2</sub> from the baseline  
6 between TMH and TN over time. Our findings provide the rationale for larger studies on  
7 TMH during surgery.  
8  
9  
10  
11  
12

13  
14 **Clinical trial registration:** The Australian New Zealand Clinical Trials Registry,  
15 unique identification number: ACTRN12616000320459  
16  
17

18  
19 **Keywords:** Hypercapnia; Oximetry; Spectroscopy, Near-Infrared; Respiration, Artificial;  
20 Delirium  
21  
22  
23  
24  
25  
26  
27  
28  
29  
30  
31  
32  
33  
34  
35  
36  
37  
38  
39  
40  
41  
42  
43  
44  
45  
46  
47  
48  
49  
50  
51  
52  
53  
54  
55  
56  
57  
58  
59  
60

## **Article Summary**

### *Strengths of this study*

- High internal validity due to blinding and random allocation to groups
- Frequent sampling of oximetry data throughout monitoring period
- Non-invasive nature of near-infrared spectroscopy (NIRS) cerebral oximetry for regional cerebral oxygen saturation (rSO<sub>2</sub>) measurements

### *Limitations of this study*

- Study findings do not apply to emergency surgeries, intra-cranial surgeries, or surgeries requiring one lung ventilation.
- Interpretation of rSO<sub>2</sub> depends on an assumption that rSO<sub>2</sub> is the same in different regions of the brain.

## **Acknowledgement**

### **Funding Statement**

Masimo provided the oximetry sensors used for this trial. This study conception, design, trial management, data collection, data analysis, and the writing of the manuscript, have been executed completely independently of Masimo and any other external organisations. This work was supported by the Department of Anaesthesia Research Fund, Austin Hospital, Heidelberg, Victoria, Australia.

### **Declaration of interest**

All authors declare no conflict of interest.

### **Presentation**

Findings of this study were presented as a poster presentation at the PostGraduate Assembly in Anesthesiology held during 8-12<sup>th</sup> December 2018 at New York, United States of America.

### **Data sharing statement**

De-identified participant data are available upon reasonable request.



## **Introduction**

In patients undergoing major surgery, the effects of mild hypercapnia on regional cerebral oxygen saturation (rSO<sub>2</sub>) have not been fully examined, and any beneficial or harmful effects of hypercapnia as a therapeutic ventilation strategy to improve cerebral oxygenation are unknown. In animal models, CO<sub>2</sub> is a well-known vasodilator, improving cerebral blood flow.<sup>1-3</sup> The neuroprotective mechanisms of mild hypercapnia, whilst not completely understood, have been postulated to be a result of an increase in cerebral blood flow, enhancement of oxygen delivery, improvements in cerebral glucose utilisation and oxidative metabolism,<sup>4,5</sup> and activation of adenosine triphosphate (ATP)-sensitive potassium channels to maintain normal neuronal activity in the setting of ischemia.<sup>6</sup>

The recent emergence of near-infrared spectroscopy (NIRS) cerebral oximetry has provided a practical method to measure rSO<sub>2</sub> continuously and non-invasively. This technology has gained substantial supportive evidence in resuscitation, critical care, and surgical applications.<sup>7-9</sup> Numerous studies have shown that NIRS can be applied clinically in the resuscitation and cardiac surgery settings, where cerebral desaturation events can be both effectively monitored and managed.<sup>10-13</sup> However, whilst absolute and relative saturation thresholds theoretically requiring prompt interventions have been proposed,<sup>14</sup> these thresholds have not been validated, and there is a lack of consensus on the indication and timing of interventions. In patients undergoing surgery, rSO<sub>2</sub> was reported to be higher with mild hypercapnia, however, the intra-operative temporal relationship between rSO<sub>2</sub> and mild hypercapnia remains unclear.<sup>15</sup>

Accordingly, we conducted a randomised controlled trial to test the hypothesis that targeted mild hypercapnia (TMH), defined as the partial pressure of carbon dioxide in arterial blood (PaCO<sub>2</sub>) between 45 and 55 mmHg, during elective major surgery would increase cerebral oxygen saturation compared to targeted normocapnia (TN), defined as PaCO<sub>2</sub> between 35 and 40 mmHg. As a secondary aim, we evaluated whether TMH would affect the development of postoperative delirium, a commonly reported complication in the immediately peri-operative setting.<sup>16-18</sup>

## **Methods**

### *Ethics approval and clinical trial registration*

The study was approved by the Austin Health Research and Ethics Committee on 6<sup>th</sup> January 2016 (HREC/15/Austin/488), and all participants gave written informed consent. The study was prospectively registered on 10<sup>th</sup> March 2016 with the Australian New Zealand Clinical Trials Registry (ACTRN12616000320459). The study was reported in accordance with the CONSORT Guidelines for reporting randomised trials.<sup>19</sup>

### *Trial design, setting, and population*

Between March 2016 and March 2017, we conducted the randomised controlled trial at the Austin Hospital, a university teaching, tertiary, metropolitan hospital at Heidelberg, Victoria. Following a pre-operative assessment at the anaesthesia pre-admissions clinic and the receipt of written informed consent, eligible patients undergoing elective major surgery were identified. Inclusion criteria included the following: adult patients (age over 18 years), surgery of greater than 2 hours' expected duration requiring at least one overnight admission, a clinical indication for continuous blood pressure monitoring via an invasive arterial line, and intermittent positive pressure ventilation via an endotracheal tube as part of standard anaesthesia care. Age criterion was modified from the previous criterion (age over 65 years) to age over 18 years in order to recruit patients who represent the intended study population. Exclusion criteria included patients undergoing cardiac surgery, procedures requiring one lung isolation, liver transplantation, intracranial surgery, GCS less than 15, known cognitive impairment, intellectual disability or a mental illness, moderate pulmonary hypertension (mean pulmonary arterial pressure greater than 40 mmHg), and American Society of Anesthesiology (ASA) status V.

### *Randomisation and blinding*

An independent statistician generated a computerised sequence of 40 allocation codes, 20 for each group. A research nurse sealed the allocation codes into sequentially numbered opaque envelopes. The study participants, surgeons, and all peri-operative staff were blinded to treatment allocation. However, it was not possible to blind the attending anaesthetist who was responsible for the delivery of the intervention. Immediately after induction of anaesthesia,

1  
2  
3 patients were randomised to either targeted mild hypercapnia (PaCO<sub>2</sub> 45-55 mmHg) or  
4 targeted normocapnia (PaCO<sub>2</sub> 35-40 mmHg). The end-tidal carbon dioxide (EtCO<sub>2</sub>) was  
5 titrated accordingly in order to achieve the desired intervention, but the anaesthetist did not  
6 have an rSO<sub>2</sub> goal to titrate to. Data collection for all the trial outcomes was collected by an  
7 independent researcher blinded to treatment allocation. The sequence was decoded after the  
8 data were analysed. The anaesthetist delivering the intervention did not participate in the  
9 assessment of postoperative delirium.  
10  
11  
12  
13  
14  
15  
16  
17

### 18 *Outcomes and data collection*

19 The primary endpoint was the absolute difference between the TMH and TN groups in  
20 percentage change in rSO<sub>2</sub> from baseline to completion of surgery. Secondary endpoints  
21 evaluated the effects of mild hypercapnia on the incidence of postoperative delirium, intra-  
22 operative pH, bicarbonate, base excess, serum potassium, and length of hospital stay (LOS).  
23  
24  
25  
26  
27

### 28 *Measurement of rSO<sub>2</sub>*

29 Regional cerebral oxygen saturation was collected using the Masimo O<sub>3</sub><sup>TM</sup> regional oximetry  
30 component of the Root<sup>TM</sup> Patient Monitor platform (O<sub>3</sub><sup>TM</sup> Masimo, Irvine, CA). This regional  
31 oximetry device uses NIRS and reflectance oximetry to monitor rSO<sub>2</sub> in the brain, displaying  
32 both absolute and trend rSO<sub>2</sub> values. The absolute oximetry value is defined as the rSO<sub>2</sub> value  
33 measured by the oximetry probe calibrated by a fixed ratio of arterial to venous blood,  
34 whereas the trend oximetry value is defined as the change in rSO<sub>2</sub> from a user-specified value  
35 (usually the baseline rSO<sub>2</sub>). The measurement errors for absolute and trend data are reported  
36 to be approximately 4% and 3% respectively when checked against reference blood samples  
37 taken from the radial artery and internal jugular bulb vein.<sup>20</sup> Regional cerebral oxygen  
38 saturation was measured in the two hemispheres separately, with a NIRS sensor attached to  
39 each side of patient's forehead. Only the absolute oximetry data were extracted and analysed.  
40 The baseline rSO<sub>2</sub> was recorded before commencing any premedication and before induction  
41 of anaesthesia. Subsequent rSO<sub>2</sub> measurements were recorded every two seconds until the  
42 last surgical suture was sited. Data were exported as comma separated values files after  
43 surgery and processed using manually written R scripts on RStudio v.1.0.136  
44 (**Supplementary File 1**). The percentage change in rSO<sub>2</sub> (%ΔrSO<sub>2</sub>) was computed by  
45 subtracting the baseline rSO<sub>2</sub> value from the measured rSO<sub>2</sub> value at all timepoints  
46  
47  
48  
49  
50  
51  
52  
53  
54  
55  
56  
57  
58  
59  
60

1  
2  
3 throughout surgery, multiplied by one hundred percent. Data from the left and right forehead  
4 were analysed separately.  
5  
6  
7

### 8 *Measurement of delirium*

9  
10 Delirium was assessed using a validated and widely utilised Confusion Assessment Method  
11 (CAM) rating scale, adapted from Inouye *et al.*, immediately on arrival to hospital, then  
12 within 18-24 hours after surgery.<sup>21,22</sup> Diagnosis of delirium requires the presence of both  
13 acute onset with fluctuating course and inattention, together with either disorganised thinking  
14 or altered level of consciousness. A single trained interviewer, blinded to randomisation and  
15 proficient and trained in CAM, conducted all the assessments pre-operatively when each  
16 patient arrived at the hospital and at 8am on the next day after surgery in the ward (within 18-  
17 24 hours postoperatively). The baseline cognitive function was not formally assessed with  
18 collateral history from family members or carers.  
19  
20  
21  
22  
23  
24  
25  
26

### 27 *Measurement of PaCO<sub>2</sub> and intra-operative adherence to group allocation*

28  
29 Immediately after tracheal intubation with a cuffed endotracheal tube, minute ventilation was  
30 adjusted to achieve an EtCO<sub>2</sub> concentration of 45-55 mmHg in the TMH group or 35-40  
31 mmHg in the TN group. Due to the presence of alveolar dead space, EtCO<sub>2</sub> can be lower than  
32 PaCO<sub>2</sub> by up to 5 mmHg. Therefore, an arterial blood gas (ABG) was obtained to check  
33 PaCO<sub>2</sub>, and ventilation was further adjusted accordingly to achieve the desired PaCO<sub>2</sub> target  
34 ranges. The PaCO<sub>2</sub>-EtCO<sub>2</sub> gradient was then maintained throughout surgery, with the  
35 assumption that the PaCO<sub>2</sub> would remain constant. Additional ABGs were sampled at the  
36 discretion of the anaesthetist if the gradient required re-evaluation, for example, requirements  
37 for an adjustment of the ventilation setting. Finally, at completion of surgery, an ABG was  
38 sampled to accurately document the PaCO<sub>2</sub> value and to assess whether PaCO<sub>2</sub> was being  
39 maintained within target values.  
40  
41  
42  
43  
44  
45  
46  
47  
48  
49

### 50 *Arterial blood gas analysis*

51 All arterial blood gas variables were collected by ABL80 FLEX Blood Gas Analyzer  
52 (Radiometer, Copenhagen, Denmark) with a fully automated micromode, eliminating the risk  
53 of user-induced bias or loss of accuracy with very small samples, and an interference-  
54 protected lactate analyser. ABG variables include partial pressure of oxygen (PaO<sub>2</sub>), PaCO<sub>2</sub>,  
55 pH, bicarbonate concentration, base excess, lactate, haemoglobin concentration (Hb), and  
56 electrolytes such as sodium and potassium ion concentrations. The machine calculates the  
57  
58  
59  
60

1  
2  
3 bicarbonate concentration using the Henderson-Hasselbalch equation and the standard base  
4 excess (SBE) using the Van Slyke equation by determining changes in bicarbonate, protein  
5 anion, and phosphate concentrations, with the reference points pH = 7.40, PaCO<sub>2</sub> = 40mmHg,  
6 and temperature = 37°C. Two or more ABG samples were measured intra-operatively, as  
7 described previously. The mean values of pH, bicarbonate concentration, base excess, and  
8 serum potassium concentration from the first and the last ABG samples were considered as  
9 some of the secondary outcomes for the study. Intra-operative pH, bicarbonate, and base  
10 excess are important variables that inform the acid–base status of a patient; in particular,  
11 bicarbonate and base excess are useful when determining the extent of metabolic  
12 contributions or compensation. Potassium concentration is a key physiological parameter that  
13 affects cardiac action potential conduction, and its relevance in the study is paramount, as  
14 hyperkalaemia from hypercapnic-induced acidosis is a potential complication of the  
15 intervention. Potential confounders to rSO<sub>2</sub> measurements, such as Hb and PaO<sub>2</sub>, were  
16 recorded. Other variables, such as lactate and sodium concentration, were collected for  
17 routine clinical care, and they were not considered as part of the outcome measures.  
18  
19  
20  
21  
22  
23  
24  
25  
26  
27  
28  
29  
30

### 31 *Standardisation of care*

32 All patients underwent a pre-operative multidisciplinary team assessment, including a  
33 haematology-led, multimodal peri-operative haemoglobin optimisation program based on the  
34 National Blood Authority of Australia's patient blood management initiatives to optimise  
35 pre-operative red cell mass, minimise peri-operative blood loss, and tolerate postoperative  
36 anaemia.<sup>23</sup> All participants were fasted two hours for clear fluids and six hours for solids,  
37 according to standard hospital fasting protocols. All participants received a general  
38 anaesthetic with propofol for induction, an inhalational agent for the maintenance of  
39 anaesthesia, with a 50% oxygen-to-air mixture to maintain oxygen saturations above 97%.  
40 Routine monitoring for all participants included continuous electrocardiogram (ECG), pulse  
41 oximetry, temperature, bispectral index (BIS) monitoring, and neuromuscular monitoring.  
42 Adequate depth of anaesthesia was ensured by targeting BIS readings between 40 and 60.  
43 Conduct of anaesthesia, including the use of additional invasive monitoring, intra-operative  
44 medications, intervention fluids, vasoactive medications, regional anaesthesia, and  
45 intraoperative opioids, were entirely at the discretion of the attending anaesthetist. In keeping  
46 with hospital protocol, we transfused blood if the haemoglobin concentration was less than 75  
47 g dL<sup>-1</sup> or less than 80 g dL<sup>-1</sup> in the presence of ongoing bleeding.  
48  
49  
50  
51  
52  
53  
54  
55  
56  
57  
58  
59  
60

### *Sample size calculations*

Based on our institution's pilot data and reported figures, normal rSO<sub>2</sub> values for awake patients could range from 60% to 80%,<sup>24</sup> which we assumed to be the case at the baseline (beginning of surgery). We assumed no change in rSO<sub>2</sub> in the control group and considered an absolute difference between the groups in percentage change in rSO<sub>2</sub> value from the baseline to the completion of surgery of 15% to be clinically important. Thus, the absolute changes in rSO<sub>2</sub> from the baseline to the end of surgery were hypothesised to be 0% in the control group and 12% (15% percentage change from the baseline of 80% rSO<sub>2</sub>) in the intervention group. Assuming a two-tailed threshold for statistical significance of 0.05 and standard deviation of the absolute change of 10%, the total sample size of 40 patients (equally distributed between two groups) will yield the 0.9 power to observe a large treatment effect (Cohen's  $d=1.1$  or higher).

### *Statistical analysis*

The study was reported in accordance with the Statistical Analyses and Methods in the Published Literature (SAMPL) Guidelines.<sup>25</sup> The statistical analysis was performed using commercial statistical software STATA/IC v.13 with a  $P$  value of 0.05 to indicate statistical significance. Figures and tables were created by manually written R scripts on RStudio v. 1.0.136 (**Supplementary File 2**). Fisher's exact test was used in the analysis of all categorical variables. For continuous variables, normality was determined by the Shapiro–Wilk test and further confirmed by a manual inspection of the skewness and kurtosis of the data. Parametric continuous data were compared by the Student's  $t$ -test, and non-parametric continuous data were compared by the Mann-Whitney U test. For normally distributed data, the results were presented as the mean (standard deviation); and for non-parametric data, the results were presented as the median [inter-quartile range] unless otherwise stated. A more detailed longitudinal analysis of time-by-treatment interaction was also conducted using a random effect generalised least squares regression model (due to the repeated measures nature of the data) with percentage change in rSO<sub>2</sub> at a given time point throughout the surgery as the output, the treatment group, the time (minutes from start of surgery), as well as the time-by-treatment interaction term as inputs. The duration of surgery varied between different patients, and therefore, in order to compare % $\Delta$ rSO<sub>2</sub> at different time points across all the patients, the time was measured using the “minutes from the start of surgery” metric. For robustness analyses, similar models adjusted for age, baseline oximetry values, and pre-

operative Hb levels were implemented, as well as models where time was measured not in minutes, but as a percentage of total surgery duration.

### *Patient and public involvement*

The study was designed to investigate the relationship between TMH and rSO<sub>2</sub>, and the incidence of postoperative delirium was one of the secondary outcomes. As mentioned previously, postoperative delirium is a commonly reported postoperative complication, and it is linked to functional decline, institutionalisation, and higher mortality.<sup>16,18</sup> Our study involved minimal invasive monitoring and interventions, thereby causing minimal inconvenience or physical discomfort to patients. The study implications, however, could potentially inform standard anaesthesia practice to smoothen patients' postoperative course of recovery and minimise LOS. Patients were involved in the study from the initial pre-admission consultation appointment where the rationale of the study, potential applications of the study outcomes, data privacy and management, and potential harmful effects were explained in detail. Study participants were not directly involved in the design and conduct of the study. Potential burden of the intervention was not rated by the patients themselves; rather, potential harmful effects were monitored by the attending anaesthetist as part of routine clinical care. Study results and outcomes, once finalised, will be posted to study participants.

## **Results**

Seventy-seven participants were screened for eligibility. Thirty-seven patients were excluded because they did not meet the inclusion criteria ( $n=6$ ), they declined to participate ( $n=30$ ), or the anaesthetist objected to the intervention ( $n=1$ ). For logistical reasons, recruitment could only be performed when the interviewer conducting the CAM testing was available. The CONSORT diagram is presented in **Figure 1**. There were no violations or breaches of the study protocol; however, two participants in the hypercapnic group had a failure of bilateral probe attachment and lead connection problem that were unable to be rectified. These patients were subsequently excluded from the analyses of oxygenation, as no  $rSO_2$  data were captured. They were included in the analysis of all other variables and endpoints. In the hypercapnic group, three participants had unilateral discontinuous oximetry readings due to intermittent signal dropout. In the normocapnic group, signal dropout occurred in two patients on the left side. The corresponding data were excluded.

The baseline participant and surgical characteristics are summarised in **Table 1**.

**Table 1.** Baseline patient characteristics and surgical characteristics

|                                       | <b>TMH group<br/>(<math>n=20</math>)</b> | <b>TN group<br/>(<math>n=20</math>)</b> |
|---------------------------------------|------------------------------------------|-----------------------------------------|
| <b><u>Patient characteristics</u></b> |                                          |                                         |
| Gender (Male : Female)                | 11:9                                     | 12:8                                    |
| Age (years)                           | 63.7 [32 to 81]                          | 65.4 [31 to 81]                         |
| Age > 65 (years)                      | 9 (45.0)                                 | 11 (55.0)                               |
| Weight (kg)                           | 83.7 [56.8 to 110.6]                     | 81.2 [67.9 to 94.5]                     |
| BMI ( $kg\ m^{-2}$ )                  | 33.6 [20.7 to 46.5]                      | 32.8 [26.8 to 38.8]                     |
| ASA Status                            |                                          |                                         |
| 1                                     | 5 (25.0)                                 | 2 (10.0)                                |
| 2                                     | 6 (30.0)                                 | 4 (20.0)                                |
| 3                                     | 7 (35.0)                                 | 10 (50.0)                               |
| 4                                     | 2 (10.0)                                 | 4 (20.0)                                |
| Diabetes                              | 4 (22.2)                                 | 5 (25.0)                                |



|                                        |                        |                        |                    |
|----------------------------------------|------------------------|------------------------|--------------------|
| COPD                                   | 5 (27.8)               | 0 (0.0)                |                    |
| Malignancy                             | 11 (61.1)              | 7 (35.0)               |                    |
| Other co-morbidities                   | 11 (61.1)              | 16 (80.0)              |                    |
| <b><u>Surgical Characteristics</u></b> |                        |                        |                    |
| Duration of surgery (mins)             | 219.0 [123.8 to 303.8] | 144.0 [107.8 to 218.2] | ( <i>P</i> =0.121) |
| Left baseline oximetry (%)             | 68.7 [63.9 to 72.2]    | 63.4 [57.3 to 69.6]    | ( <i>P</i> =0.233) |
| Right baseline oximetry (%)            | 67.9 [64.6 to 70.3]    | 64.0 [59.4 to 69.0]    | ( <i>P</i> =0.286) |
| Pulse oximetry (%)                     | 98.5 [98.1 to 99.0]    | 98.5 [97.9 to 99.0]    | ( <i>P</i> =0.834) |
| LOS (days)                             | 5 [2.0 to 12.0]        | 5 [1.8 to 11.5]        | ( <i>P</i> =0.988) |
| Type of surgery                        |                        |                        |                    |
| colorectal                             | 2 (10.0)               | 1 (5.0)                |                    |
| endocrine                              | 2 (10.0)               | 2 (10.0)               |                    |
| ear nose & throat                      | 0 (0.0)                | 1 (5.0)                |                    |
| hepatobiliary                          | 6 (30.0)               | 9 (45.0)               |                    |
| spinal surgery                         | 1 (5.0)                | 1 (5.0)                |                    |
| orthopedic                             | 2 (10.0)               | 1 (5.0)                |                    |
| thoracic                               | 5 (25.0)               | 1 (5.0)                |                    |
| urology                                | 2 (10.0)               | 3 (15.0)               |                    |
| vascular                               | 0 (0.0)                | 1 (5.0)                |                    |

Data reported as number (%) or median [inter-quartile range], except for age, which is reported as mean [range]

ASA: American Society of Anesthesiologists

BMI: body mass index

COPD: chronic obstructive pulmonary disease

LOS: length of hospital stay

Other co-morbidities include any of the following, ischaemic heart disease, atrial fibrillation, hypertension, history of cerebral vascular disease, and chronic kidney impairment

Spinal surgery includes non-intracranial procedures

Thoracic surgery includes procedures not requiring one lung ventilation, e.g. mediastinoscopy with nodal dissection

TMH: targeted mild hypercapnia, TN: targeted normocapnia

Both groups were similar in terms of gender, age, weight, body mass index, ASA physical status, and type of surgery performed. In terms of co-morbidities, both groups were similar, except for the presence of chronic obstructive pulmonary disease. There was 100%

1  
2  
3 compliance to the designated PaCO<sub>2</sub> intra-operative targets. The median [inter-quartile range,  
4 IQR] PaCO<sub>2</sub> in the TMH group and TN groups were 51.5 mmHg [46.9 to 60.9] and 34.8  
5 mmHg [32.8 to 38.1], respectively ( $P<0.001$ ). With regards to surgical characteristics, the  
6 duration of surgery was longer in the TMN group, with a median [IQR] duration of 219  
7 minutes [124 to 304] versus 144 minutes [108 to 218] in the TN group, although this was not  
8 significant at the 5% level ( $P=0.121$ ). PaO<sub>2</sub> was similar between the two groups: 156.8  
9 mmHg [146.3 to 217.2] in the TMH group and 142.5 mmHg [122.5 to 199.1] in the TN group  
10 ( $P=0.380$ ). Oxygen saturation was similar: 98.5% in the TMH group [98.1 to 99.0] and  
11 98.5% in the TN group [97.9 to 99.0] ( $P=0.834$ ). Both groups also had similar mean arterial  
12 pressure (MAP) intra-operatively ( $P=0.307$ ), similar total Hb (130.50 vs. 122.25 g L<sup>-1</sup>;  
13  $P=0.132$ ), and similar total dose of intra-operative opioid received, 21.67 mg in the TMH  
14 group [13.75 to 32.50] and 16.67 mg in the TN group [10.00 to 22.50] ( $P=0.22$ ). In terms of  
15 intra-operative positioning of patients, one patient from each group was positioned in steep  
16 reverse Trendelenburg with minimal tilt. All other patients were positioned in the supine  
17 position with a neutral head position.  
18  
19  
20  
21  
22  
23  
24  
25  
26  
27  
28  
29  
30

### 31 *Primary endpoint*

32 On the left hemisphere, the median [IQR] baseline oximetry was 68.7% [63.9 to 72.2] in the  
33 TMH group vs. 63.4% [57.3 to 69.6] in the TN group ( $P=0.233$ ). On the right hemisphere,  
34 the median [IQR] baseline oximetry was 67.9% [64.6 to 70.3] in the TMH group vs. 64.0%  
35 [59.4 to 69.9] in the TN group ( $P=0.286$ ). On both sides, the % $\Delta$ rSO<sub>2</sub> was greater in the  
36 TMH group than the TN group throughout the duration of surgery (**Figure 2**). The mean  
37 (standard deviation, SD) percentage changes in rSO<sub>2</sub> from the baseline to the conclusion of  
38 the surgery in the TMH group were +8.56% (18.90%) on the left and +13.86% (18.17%) on  
39 the right; and in TN the group, they were -6.18% (17.24%) on the left and -5.48% (18.94%)  
40 on the right. The resulting treatment effects were 19% (95% CI [9.2 to 28.8];  $P<0.001$ ) on the  
41 left and 19% (95% CI [10.9 to 27.0];  $P<0.001$ ) on the right (**Table 2**).  
42  
43  
44  
45  
46  
47  
48  
49  
50  
51  
52  
53  
54  
55  
56  
57  
58  
59  
60

**Table 2.** Percentage change in cerebral oximetry (% $\Delta$ rSO<sub>2</sub>) from baseline

| Time from start of surgery (mins) |     | 15                 | 30                 | 45                  | 60                  | 75                  | 90                  | 105                 | 120                 |
|-----------------------------------|-----|--------------------|--------------------|---------------------|---------------------|---------------------|---------------------|---------------------|---------------------|
| Left                              | TMH | 0.8 (12.9)<br>{15} | 5.8 (12.3)<br>{15} | 9.0 (15.9)<br>{15}  | 7.0 (14.6)<br>{15}  | 8.5 (15.4)<br>{14}  | 7.3 (14.7)<br>{13}  | 7.7 (17.4)<br>{13}  | 8.1 (14.8)<br>{13}  |
|                                   | TN  | 4.7 (10.5)<br>{18} | 3.2 (15.4)<br>{18} | -1.9 (14.1)<br>{17} | -5.6 (12.7)<br>{17} | -5.3 (15.2)<br>{17} | -5.5 (15.8)<br>{17} | -6.0 (15.2)<br>{17} | -3.6 (15.8)<br>{14} |
| Right                             | TMH | 6.0 (12.9)<br>{17} | 9.8 (13.2)<br>{17} | 10.4 (18.1)<br>{17} | 11.1 (17.4)<br>{17} | 13.0 (16.4)<br>{16} | 15.6 (17.3)<br>{15} | 14.4 (17.5)<br>{14} | 14.1 (13.6)<br>{14} |
|                                   | TN  | 5.2 (12.6)<br>{20} | 3.9 (11.7)<br>{20} | -3.3 (13.2)<br>{19} | -5.2 (12.1)<br>{19} | -5.4 (12.3)<br>{19} | -4.7 (14.1)<br>{19} | -3.8 (13.7)<br>{18} | -1.3 (13.9)<br>{15} |

| Time from start of surgery (mins) |     | 120                 | 240                 | 360                 | 480                | 600                | 720        | Mean % difference from start to completion of surgery | 95% confidence interval | P value (treatment) |
|-----------------------------------|-----|---------------------|---------------------|---------------------|--------------------|--------------------|------------|-------------------------------------------------------|-------------------------|---------------------|
| Left                              | TMH | 8.1 (14.8)<br>{13}  | 6.8 (20.6)<br>{7}   | 6.4 (32.5)<br>{4}   | -8.6 (21.1)<br>{3} | -6.1 (14.1)<br>{3} | 6.9<br>{1} | 19.0                                                  | 9.2 -28.8               | <0.001              |
|                                   | TN  | -3.6 (15.8)<br>{14} | -10.4 (39.5)<br>{5} | -43.4 (34.9)<br>{2} | -27.8<br>{1}       |                    |            |                                                       |                         |                     |
| Right                             | TMH | 14.1 (13.6)<br>{14} | 18.4 (23.5)<br>{8}  | 16.8 (36.8)<br>{4}  | 1.5 (14.9)<br>{3}  | 3.0 (8.7)<br>{3}   | 2.0<br>{1} | 19.0                                                  | 10.9- 27.0              | <0.001              |
|                                   | TN  | -1.3 (13.9)<br>{15} | -5.3 (32.6)<br>{5}  | -35.4 (26.9)<br>{2} | -37.8<br>{1}       |                    |            |                                                       |                         |                     |

Data reported as mean (standard deviation) {sample size}, and presented every 15 minutes for the first 2 hours and every 2 hours afterwards

TMH: targeted mild hypercapnia, TN: targeted normocapnia

On the longitudinal time-by-treatment interaction analysis, the difference in  $\% \Delta rSO_2$  on both left and right hemispheres between the two groups diverged with time, with the intervention group exhibiting a smaller percentage decrease over time compared to the control group (time-by-treatment interaction  $P < 0.001$  for both left and right hemispheres). We obtained very similar results on the robustness analyses when the above model was adjusted for age, baseline oximetry, and pre-operative Hb levels, as well as when the percentage of total duration of surgery, instead of minutes from the start of surgery, were included.

### Secondary outcomes

Postoperative delirium was statistically significantly less common in the TMH group. Postoperative delirium was present in 0 out of 20 (0%) participants in the TMH group and 6 out of 20 (30%) participants in the TN group (risk difference 0.3, 95% CI [0.1 to 0.5], Fisher's exact  $P = 0.02$ ) (Table 3).

**Table 3.** Postoperative delirium and opioid doses

|                               | TMH group<br>(n=20)    | TN group<br>(n=20)     |                |
|-------------------------------|------------------------|------------------------|----------------|
| <b>Pre-medication</b>         |                        |                        |                |
| Number of patients            | 0 (0.0)                | 2 (10.0)               |                |
| Mean midazolam dose (mg)      | 0                      | 1.75                   |                |
| <b>Intra-operative opioid</b> |                        |                        |                |
| Total dose (mg)               | 21.67 [13.75 to 32.50] | 16.67 [10.00 to 22.50] | ( $P = 0.22$ ) |
| Received i.v. morphine        | 2 (10.0)               | 1 (5.0)                |                |
| Received i.v. fentanyl        | 10 (50.0)              | 14 (70.0)              |                |
| Received i.v. oxycodone       | 9 (45.0)               | 7 (35.0)               |                |
| Received i.v. tramadol        | 4 (20.0)               | 0 (0.0)                |                |
| Received i.v. clonidine       | 0 (0.0)                | 2 (10.0)               |                |
| <b>Intrathecal morphine</b>   |                        |                        |                |
| Number of patients            | 5                      | 2                      |                |
| Mean dose (mcg)               | 220                    | 350                    |                |

|                                           |                  |                  |                   |
|-------------------------------------------|------------------|------------------|-------------------|
| <b>Epidural analgesia</b>                 |                  |                  |                   |
| Number of patients                        | 0                | 0                |                   |
| <b>Blood glucose level</b>                |                  |                  |                   |
| Glucose (mmol L <sup>-1</sup> )           | 7.1 [7.0 to 7.1] | 6.6 [6.4 to 6.7] | ( <i>P</i> =0.33) |
| <b>Pre-operative CAM</b>                  | 0 [0.0 to 0.0]   | 0 [0.0 to 0.0]   |                   |
| <b>Postoperative CAM</b>                  | 0 [0.0 to 0.0]   | 1.5 [0.0 to 3.0] |                   |
| <b>Presence of postoperative delirium</b> | 0 (0.0)          | 6 (30.0)         | ( <i>P</i> =0.02) |

Data reported as median [inter-quartile range] or number (%)

CAM: Confusion Assessment Method

Note some patients received 2 or more different intra-operative opioids

Total dose of intra-operative opioid normalised to i.v. morphine equivalent

TMH: targeted mild hypercapnia, TN: targeted normocapnia

In terms of acid–base variables, median intra-operative pH was statistically significantly lower (7.31 vs. 7.46; *P*<0.001), and intra-operative bicarbonate was statistically significantly higher (25.00 vs. 24.00 mEq L<sup>-1</sup>; *P*=0.020) in the TMH. No statistically significant differences in base excess (-1.00 vs. 1.00 mmol L<sup>-1</sup>; *P*=0.069) and potassium (3.98 vs. 4.03 mEq L<sup>-1</sup>; *P*=0.759) were observed intra-operatively. Length of hospital stay was also similar between the two groups (5 vs. 5 days; *P*=0.988). These results are summarised in **Table 4**.

**Table 4.** Arterial blood gas values and the corresponding EtCO<sub>2</sub>

|                                     | <b>TMH group<br/>(<i>n</i>=20)</b> | <b>TN group<br/>(<i>n</i>=20)</b> | <i>P</i> -value |
|-------------------------------------|------------------------------------|-----------------------------------|-----------------|
| pH                                  | 7.31 [7.27 to 7.33]                | 7.46 [7.43 to 7.47]               | <0.001          |
| PaO <sub>2</sub> (mmHg)             | 156.8 [146.3 to 217.2]             | 142.5 [122.5 to 199.1]            | 0.380           |
| PaCO <sub>2</sub> (mmHg)            | 51.50 [46.88 to 60.88]             | 34.75 [32.75 to 38.12]            | <0.001          |
| EtCO <sub>2</sub> (mmHg)            | 46.40 [39.80 to 50.20]             | 30.40 [28.50 to 32.00]            | <0.001          |
| Bicarbonate (mEq L <sup>-1</sup> )  | 25.00 [24.00 to 27.75]             | 24.00 [22.00 to 24.62]            | 0.020           |
| Base excess (mmol L <sup>-1</sup> ) | -1.00 [-2.50 to 0.25]              | 1.00 [-0.88 to 2.00]              | 0.069           |
| Potassium (mEq L <sup>-1</sup> )    | 3.98 [3.73 to 4.38]                | 4.03 [3.58 to 4.31]               | 0.759           |
| Total Hb (g L <sup>-1</sup> )       | 130.50 [118.12 to 140.62]          | 122.25 [106.88 to 131.25]         | 0.132           |

1  
2  
3  
4 Data reported as median [inter-quartile range] or number (%)

5 EtCO<sub>2</sub>: end tidal carbon dioxide

6  
7 Hb: haemoglobin concentration

8 PaCO<sub>2</sub>: partial pressure of carbon dioxide in arterial blood

9  
10 PaO<sub>2</sub>: partial pressure of oxygen in arterial blood

11  
12 TMH: targeted mild hypercapnia, TN: targeted normocapnia  
13  
14  
15  
16  
17  
18  
19  
20  
21  
22  
23  
24  
25  
26  
27  
28  
29  
30  
31  
32  
33  
34  
35  
36  
37  
38  
39  
40  
41  
42  
43  
44  
45  
46  
47  
48  
49  
50  
51  
52  
53  
54  
55  
56  
57  
58  
59  
60

For peer review only

## **Discussion**

We conducted a prospective, single centre, single blinded, randomised controlled trial evaluating the effects of TMH and TN on rSO<sub>2</sub> in patients undergoing major surgery. TMH led to a stable increase in both left and right NIRS-derived rSO<sub>2</sub> from the baseline values, while TN led to a decrease in rSO<sub>2</sub>. This effect was sustained throughout surgery and became more pronounced with the passage of time. Furthermore, TMH was associated with a lower incidence of postoperative delirium within 24 hours after surgery.

Whilst the relationship between elevated PaCO<sub>2</sub> and cerebral blood flow (CBF) is well described,<sup>26-29</sup> the associations between hypercapnia and higher rSO<sub>2</sub> are poorly understood. Numerous factors, for instance, cardiac output, haemoglobin affinity for oxygen, cerebral autoregulation, and the ratio of cerebral arterial to venous blood volume, affect rSO<sub>2</sub> in the setting of hypercapnia, but changes in PaCO<sub>2</sub> and CBF, in turn, have a direct influence on these factors.<sup>30</sup> To complicate the subject further, the duration of effect of hypercapnia on rSO<sub>2</sub> is unknown. In our study, confounding variables, such as MAP, PaO<sub>2</sub>, Hb, and intra-operative position, were similar between the TMH and TN groups. However, pH, which directly affects the haemoglobin affinity for oxygen via the Bohr Effect, was significantly different. Since we cannot measure the ratio of arterial to venous blood volume, it would be impetuous to comment on the mechanism behind the observed higher rSO<sub>2</sub> values in TMH. Clinically, similar observations have been reported previously. Eastwood *et al.* found that mild hypercapnia resulted in higher rSO<sub>2</sub> values in post-cardiac arrest patients when rSO<sub>2</sub> values at the end of the normocapnic period and the end of the hypercapnic period were compared.<sup>31</sup> When Akca *et al.* delivered mild hypercapnia intra-operatively to investigate tissue oxygenation and its relationship with wound infection risk after surgery, cerebral oxygen saturation was found to be higher in the mild hypercapnic group.<sup>15</sup> Similarly, rSO<sub>2</sub> remained higher in hypercapnic patients throughout shoulder surgery, and less cerebral desaturation events were observed by Murphy *et al.*<sup>32</sup> Our study is one of the few randomised controlled trials that investigated rSO<sub>2</sub> change over time. We found that the sustained difference in rSO<sub>2</sub> over time was a combined effect of a stable increase in rSO<sub>2</sub> from the baseline in the TMH group and a stable decrease in

1  
2  
3  
4 rSO<sub>2</sub> from the baseline in the TN group. In the literature, the association between  
5 normocapnia and reduced CBF and lower levels of rSO<sub>2</sub> were reported briefly.<sup>33</sup>  
6 Normocapnia was also found to be superior in preserving cerebral autoregulation.<sup>34</sup>  
7 However, the exact mechanism and associations between normocapnia and variations in  
8 rSO<sub>2</sub> values are not entirely clear. Whilst theoretical absolute and relative saturation  
9 thresholds requiring prompt interventions have been proposed,<sup>14</sup> these thresholds have  
10 not been validated and there is a lack of consensus on the indication and timing of  
11 interventions. In our study, the reduction in rSO<sub>2</sub> from the baseline was small in the  
12 majority of patients in the TN group, and the attending anaesthetists had no rSO<sub>2</sub> target  
13 to titrate to. Comparing the TMH and TN groups, the sustained difference in percentage  
14 change in rSO<sub>2</sub> over time is a novel finding.  
15  
16  
17  
18  
19  
20  
21  
22  
23  
24  
25

26 Interestingly, the incidence of postoperative delirium after surgery was lower in the  
27 TMH group, while LOS remained similar between the groups. Patients who suffered  
28 from postoperative delirium were all in the TN group, but they were also older (median  
29 [IQR] age = 72 [59.5 to 77]) and had higher ASA scores (ASA scores of 3, 2, 1, 4 and  
30 4). Their baseline medical co-morbidities and duration of surgery (median [IQR]  
31 duration of surgery = 171 minutes [83.5 to 254.5]) were similar to other study  
32 participants. There has been conflicting evidence in the literature regarding the  
33 relationship between rSO<sub>2</sub> and LOS or postoperative cognitive performance. Cognitive  
34 outcomes were similar in groups with or without NIRS-based rSO<sub>2</sub> optimisation in a  
35 recent randomised controlled trial.<sup>14,35</sup> On the other hand, Murkin *et al.* found that  
36 monitoring and reacting to cerebral desaturation during coronary artery bypass surgery  
37 was associated with clinical benefits.<sup>13</sup> Patients with shorter LOS (<10 days) had a  
38 higher mean rSO<sub>2</sub>. Intra-operative NIRS rSO<sub>2</sub> monitoring led to a significant reduction  
39 in postoperative cognitive disturbance, confirmed by Trafidlo *et al.*<sup>36</sup> Casati *et al.* also  
40 reported that higher rSO<sub>2</sub> led to shorter LOS and improved Mini-Mental State  
41 Examination scores in elderly patients undergoing major abdominal surgery,<sup>37</sup> and  
42 Schoen *et al.* found that low pre-operative rSO<sub>2</sub> was associated with a higher incidence  
43 of postoperative delirium. Among patients who started at a normal rSO<sub>2</sub> level, those  
44 who developed delirium had a larger intra-operative drop in rSO<sub>2</sub>.<sup>38</sup> Our findings were  
45 consistent with those of Schoen *et al.*; however, they need to be interpreted with  
46  
47  
48  
49  
50  
51  
52  
53  
54  
55  
56  
57  
58  
59  
60



1  
2  
3  
4 caution, as the ASA scores and age were slightly higher in the TN group, and our study  
5 was not designed to quantitatively investigate postoperative cognitive performance in  
6 hypercapnia.  
7  
8

9  
10  
11 Implications of our findings demonstrate that TMH can be delivered reliably during  
12 major surgery, and its effects on rSO<sub>2</sub> can be monitored with NIRS in most patients. Its  
13 delivery is reliably associated with increased levels of rSO<sub>2</sub>, and the relatively higher  
14 rSO<sub>2</sub> is sustained over the duration of surgery, an observation that has not been reported  
15 in the literature. Furthermore, TMH may reduce the incidence of the development of  
16 immediate postoperative delirium. A clinical concern of mild hypercapnia is  
17 hypercapnic-induced acidosis and the subsequent development of hyperkalaemia.  
18 Whilst a linear correlation between arterial carbon dioxide and plasma pH is well  
19 reported,<sup>39</sup> the relationship between acute hypercapnia, respiratory acidosis, and plasma  
20 potassium is also poorly understood.<sup>40</sup> In the present study, we found no association  
21 between hypercapnia and serum potassium concentration, a finding also supported by  
22 others.<sup>41</sup> We did not observe any other deleterious or adverse effects from hypercapnic-  
23 induced acidosis such as cardiac arrhythmias in our study. Interestingly, whilst our  
24 study was not designed to measure differences in analgesia and partial pressure of  
25 oxygen in arterial blood, we observed a 10% higher median PaO<sub>2</sub> level in the TMH  
26 group and found that the median intra-operative analgesia requirements were also  
27 approximately 30% higher. Both arterial oxygen levels and pain have been reported to  
28 influence tissue oxygenation,<sup>42</sup> which was not directly measured in our study. The effect  
29 of pain on cerebral oxygenation is unclear and has not been borne out in clinical  
30 studies;<sup>43</sup> further studies exploring this association are needed. Finally, we have shown  
31 that NIRS-based cerebral oximetry is a non-invasive and practical method of measuring  
32 rSO<sub>2</sub>, easily incorporated into the existing collection of routine monitoring variables,  
33 findings that are in agreement with other research groups.<sup>20,44-46</sup>  
34  
35  
36  
37  
38  
39  
40  
41  
42  
43  
44  
45  
46  
47  
48  
49  
50  
51  
52  
53

54 Our study has multiple strengths. Our findings have high internal validity because the  
55 study was a randomised controlled trial with concealed allocation and blinded  
56 assessment, minimising selection and ascertainment bias. The rSO<sub>2</sub> data were exported  
57  
58  
59  
60

1  
2  
3  
4 directly to RStudio, and ABG data were analysed by the ABL Blood Gas Analyzer,  
5 rendering sampling error from data entry unlikely, thereby increasing the robustness of  
6 our findings. Sampling of continuous oximetry data resulted in a stream of oximetry  
7 data throughout the monitoring periods, maximising the details of our assessment.  
8 Although the duration of surgery was different for individual patients, oximetry data  
9 were not normalised to another time scale, enabling a fair comparison of data across the  
10 study groups. NIRS-derived  $rSO_2$  has been criticised for potential extra-cranial  
11 contamination that would confound true  $rSO_2$ .<sup>47</sup> However, there is sufficient evidence to  
12 support the accuracy of NIRS-derived  $rSO_2$ ,<sup>20,44</sup> particularly in the case of hypercapnia,  
13 where extra-cranial signal interference has been shown to be insignificant, justifying its  
14 reliability.<sup>48</sup> Moreover, as the technology was the same in both groups, any inaccuracy  
15 should not have been a source of bias.  
16  
17  
18  
19  
20  
21  
22  
23  
24  
25  
26  
27

28 Our study also has a number of limitations. The attending anaesthetists were not blinded  
29 due to the nature of the intervention. Nevertheless, bias was mitigated by the fact that  
30 measurements were taken directly from the cerebral oximetry machine, and the  
31 assessment of delirium was conducted by an independent researcher blinded to the  
32 intervention. The external validity of our findings was restricted by the small sample  
33 size from one single centre. The sample size calculation was based on the assumption  
34 that there were no changes in  $rSO_2$  values from the baseline in the TN group. The  
35 observed negative change can therefore impact the calculation. The strong nature of  
36 interaction between treatment and time for  $rSO_2$  outcome should be treated with caution  
37 due to the potential minor departures of the data from the linear trend. Our findings  
38 were not applicable to patients undergoing emergency surgery, intracranial surgery, or  
39 surgery requiring one lung ventilation. The cerebral oximetry probes were only attached  
40 to the forehead, measuring  $rSO_2$  within the frontal cortex region, which carries the  
41 assumption that  $rSO_2$  was homogenous across every area of the brain. Quantification of  
42 device failure rate, despite being a critical consideration, cannot be described by our  
43 study design.  
44  
45  
46  
47  
48  
49  
50  
51  
52  
53  
54  
55  
56  
57  
58  
59  
60

We did not measure cardiac output, stroke volume, and systemic vascular resistance. Therefore, the effects on changes in intrathoracic pressure on cardiac output are unknown. Changes in intrathoracic pressure may have adversely impacted cardiac output, which may in turn have affected the EtCO<sub>2</sub>. However, given that the positive end-expiratory pressure was held constant in both groups, and the changes in lung tidal volumes were relatively small, the impact of intrathoracic pressure on cardiac output is likely to be small. Finally, our findings of a greater incidence of early postoperative delirium in the TN group need to be interpreted with caution, as confounders of postoperative delirium were not controlled, our study was not powered to investigate postoperative delirium, and mental state was only assessed by CAM, once pre-operatively and once postoperatively. Accordingly, our findings for delirium should be viewed as hypothesis generating. Nevertheless, if we were to consider that our effect size observed (i.e. risk difference of 0.3) could be due to chance and a smaller effect would be observed in a larger study, an appropriate powered randomised controlled trial for this outcome would be very feasible. If the proportion of patients with delirium in the intervention group is 10%, to achieve 90% power, the required sample size for each group would be ninety-two.

## **Conclusion**

In summary, TMH was associated with a stable increase in rSO<sub>2</sub> from the baseline, while TN was associated with a decrease in rSO<sub>2</sub> from the baseline in both hemispheres. This effect was sustained and became more pronounced with the passage of time intra-operatively.

## **Author Contributions**

Clarence Wong: This author contributed to data collection, data analysis, and manuscript write-up.

Leonid Churilov: This author contributed to data analysis and manuscript write-up.

Dean Cowie: This author contributed to patient recruitment, data collection, and preparation of manuscript.

Chong Tan: This author contributed to patient recruitment and preparation of manuscript.

Raymond Hu: This author contributed to patient recruitment and preparation of manuscript.

David Tremewen: This author contributed to patient recruitment and preparation of manuscript.

Brett Pearce: This author contributed to patient recruitment and preparation of manuscript.

Param Pillai: This author contributed to data collection and preparation of manuscript.

Dharshi Karalipillai: This author contributed to data collection and preparation of manuscript.

Rinaldo Bellomo: This author contributed to study design and preparation of manuscript.

Laurence Weinberg: This author designed the study, contributed to patient recruitment, data collection, data analysis, and preparation of manuscript.

## References

1. Brosnan RJ, Steffey EP, LeCouteur RA, Imai A, Farver TB, Kortz GD. Effects of ventilation and isoflurane end-tidal concentration on intracranial and cerebral perfusion pressures in horses. *American journal of veterinary research*. 2003;64(1):21-25.
2. Faraci FM, Breese KR, Heistad DD. Cerebral vasodilation during hypercapnia. Role of glibenclamide-sensitive potassium channels and nitric oxide. *Stroke*. 1994;25(8):1679-1683.
3. Hino JK, Short BL, Rais-Bahrami K, Seale WR. Cerebral blood flow and metabolism during and after prolonged hypercapnia in newborn lambs. *Critical care medicine*. 2000;28(10):3505-3510.
4. Nakahata MDK, Kinoshita MDPDH, Hirano MDY, Kimoto MDY, Iranami MDH, Hatano MDPDY. Mild Hypercapnia Induces Vasodilation via Adenosine Triphosphate-sensitive K<sup>+</sup>Channels in Parenchymal Microvessels of the Rat Cerebral Cortex. *Anesthesiology*. 2003;99(6):1333-1339.
5. Kaku DA, Giffard RG, Choi DW. Neuroprotective effects of glutamate antagonists and extracellular acidity. *Science (New York, NY)*. 1993;260(5113):1516-1518.
6. Vannucci RC, Brucklacher RM, Vannucci SJ. Effect of Carbon Dioxide on Cerebral Metabolism during Hypoxia-Ischemia in the Immature Rat. *Pediatr Res*. 1997;42(1):24-29.
7. Murkin JM, Arango M. Near-infrared spectroscopy as an index of brain and tissue oxygenation. *Br J Anaesth*. 2009;103 Suppl 1:i3-13.
8. Elizabeth A, Frost M. Cerebral oximetry: emerging applications for an established technology. *Anesthesiol News*. 2012;38:10.
9. Steppan J, Hogue CW, Jr. Cerebral and tissue oximetry. *Best Pract Res Clin Anaesthesiol*. 2014;28(4):429-439.
10. Ahn A, Yang J, Inigo-Santiago L, Parnia S. A feasibility study of cerebral oximetry monitoring during the post-resuscitation period in comatose patients following cardiac arrest. *Resuscitation*. 2014;85(4):522-526.

11. Storm C, Leithner C, Krannich A, et al. Regional cerebral oxygen saturation after cardiac arrest in 60 patients--a prospective outcome study. *Resuscitation*. 2014;85(8):1037-1041.
12. Ito N, Nishiyama K, Callaway CW, et al. Noninvasive regional cerebral oxygen saturation for neurological prognostication of patients with out-of-hospital cardiac arrest: a prospective multicenter observational study. *Resuscitation*. 2014;85(6):778-784.
13. Murkin JM, Adams SJ, Novick RJ, et al. Monitoring brain oxygen saturation during coronary bypass surgery: a randomized, prospective study. *Anesthesia and analgesia*. 2007;104(1):51-58.
14. Deschamps A, Hall R, Grocott H, et al. Cerebral Oximetry Monitoring to Maintain Normal Cerebral Oxygen Saturation during High-risk Cardiac Surgery: A Randomized Controlled Feasibility Trial. *Anesthesiology*. 2016;124(4):826-836.
15. Akca O, Liem E, Suleman MI, Doufas AG, Galandiuk S, Sessler DI. Effect of intra-operative end-tidal carbon dioxide partial pressure on tissue oxygenation. *Anaesthesia*. 2003;58(6):536-542.
16. Robinson TN, Eiseman B. Postoperative delirium in the elderly: diagnosis and management. *Clinical Interventions in Aging*. 2008;3(2):351-355.
17. Liu LL, Leung JM. Predicting adverse postoperative outcomes in patients aged 80 years or older. *Journal of the American Geriatrics Society*. 2000;48(4):405-412.
18. Inouye SK. Delirium in older persons. *The New England journal of medicine*. 2006;354(11):1157-1165.
19. Schulz KF, Altman DG, Moher D. CONSORT 2010 Statement: updated guidelines for reporting parallel group randomised trials. *BMJ*. 2010;340.
20. Redford D, Paidy S, Kashif F. Absolute and trend accuracy of a new regional oximeter in healthy volunteers during controlled hypoxia. *Anesth Analg*. 2014;119(6):1315-1319.
21. Inouye SK, van Dyck CH, Alessi CA, Balkin S, Siegal AP, Horwitz RI. Clarifying confusion: the confusion assessment method. A new method for detection of delirium. *Annals of internal medicine*. 1990;113(12):941-948.

22. Sharon K, Inouye MD, MPH. Confusion Assessment Method: Training Manual and Coding Guide, Copyright 2003.
23. National Blood Authority. Blood Management Guidelines: Module 2 Perioperative. 2012; <http://www.nba.gov.au/guidelines/module2/po-mod2.pdf2>.
24. Vretzakis G, Georgopoulou S, Stamoulis K, et al. Cerebral oximetry in cardiac anesthesia. *Journal of thoracic disease*. 2014;6 Suppl 1:S60-69.
25. Lang TA, Altman DG. Basic statistical reporting for articles published in biomedical journals: the "Statistical Analyses and Methods in the Published Literature" or the SAMPL Guidelines. *International journal of nursing studies*. 2015;52(1):5-9.
26. Curley G, Laffey JG, Kavanagh BP. Bench-to-bedside review: carbon dioxide. *Critical care (London, England)*. 2010;14(2):220.
27. Yokoyama I, Inoue Y, Kinoshita T, Itoh H, Kanno I, Iida H. Heart and brain circulation and CO<sub>2</sub> in healthy men. *Acta physiologica (Oxford, England)*. 2008;193(3):303-308.
28. Battisti-Charbonney A, Fisher J, Duffin J. The cerebrovascular response to carbon dioxide in humans. *J Physiol*. 2011;589(Pt 12):3039-3048.
29. Giardino ND, Friedman SD, Dager SR. Anxiety, respiration, and cerebral blood flow: implications for functional brain imaging. *Compr Psychiatry*. 2007;48(2):103-112.
30. Vranken NPA, Weerwind PW, Sutedja NA, Severdija EE, Barenbrug PJC, Maessen JG. Cerebral Oximetry and Autoregulation during Cardiopulmonary Bypass: A Review. *The journal of extra-corporeal technology*. 2017;49(3):182-191.
31. Eastwood GM, Tanaka A, Bellomo R. Cerebral oxygenation in mechanically ventilated early cardiac arrest survivors: The impact of hypercapnia. *Resuscitation*. 2016;102:11-16.
32. Murphy GS, Szokol JW, Avram MJ, et al. Effect of ventilation on cerebral oxygenation in patients undergoing surgery in the beach chair position: a randomized controlled trial. *British journal of anaesthesia*. 2014;113(4):618-627.

- 1  
2  
3  
4 33. Brian Johnny E, MD. Carbon Dioxide and the Cerebral  
5 Circulation *Anesthesiology: The Journal of the American Society of*  
6 *Anesthesiologists*. 1998;88(5):1365-1386.  
7  
8  
9 34. Severdija EE, Vranken NP, Simons AP, et al. Hemodilution Combined With  
10 Hypercapnia Impairs Cerebral Autoregulation During Normothermic  
11 Cardiopulmonary Bypass. *Journal of cardiothoracic and vascular anesthesia*.  
12 2015;29(5):1194-1199.  
13  
14  
15 35. Rogers CA, Stoica S, Ellis L, et al. Randomized trial of near-infrared  
16 spectroscopy for personalized optimization of cerebral tissue oxygenation during  
17 cardiac surgery. *Br J Anaesth*. 2017;119(3):384-393.  
18  
19  
20 36. Trafidlo T, Gaszynski T, Gaszynski W, Nowakowska-Domagala K.  
21 Intraoperative monitoring of cerebral NIRS oximetry leads to better  
22 postoperative cognitive performance: a pilot study. *International journal of*  
23 *surgery (London, England)*. 2015;16(Pt A):23-30.  
24  
25  
26 37. Casati A, Fanelli G, Pietropaoli P, et al. Continuous monitoring of cerebral  
27 oxygen saturation in elderly patients undergoing major abdominal surgery  
28 minimizes brain exposure to potential hypoxia. *Anesth Analg*. 2005;101(3):740-  
29 747, table of contents.  
30  
31  
32 38. Schoen J, Meyerrose J, Paarmann H, Heringlake M, Hueppe M, Berger K-U.  
33 Preoperative regional cerebral oxygen saturation is a predictor of postoperative  
34 delirium in on-pump cardiac surgery patients: a prospective observational trial.  
35 *Critical Care*. 2011;15(5):R218-R218.  
36  
37  
38 39. Finsterer U, Luhr HG, Wirth AE. Effects of acute hypercapnia and hypocapnia  
39 on plasma and red cell potassium, blood lactate and base excess in man during  
40 anesthesia. *Acta anaesthesiologica Scandinavica*. 1978;22(4):353-366.  
41  
42  
43 40. Adroque HJ, Madias NE. Changes in plasma potassium concentration during  
44 acute acid-base disturbances. *The American journal of medicine*.  
45 1981;71(3):456-467.  
46  
47  
48 41. Natalini G, Seramondi V, Fassini P, et al. Acute respiratory acidosis does not  
49 increase plasma potassium in normokalaemic anaesthetized patients. A  
50 controlled randomized trial. *European Journal of Anaesthesiology*.  
51 2006;18(6):394-400.  
52  
53  
54  
55  
56  
57  
58  
59  
60



- 1  
2  
3  
4  
5  
6  
7  
8  
9  
10  
11  
12  
13  
14  
15  
16  
17  
18  
19  
20  
21  
22  
23  
24  
25  
26  
27  
28  
29  
30  
31  
32  
33  
34  
35  
36  
37  
38  
39  
40  
41  
42  
43  
44  
45  
46  
47  
48  
49  
50  
51  
52  
53  
54  
55  
56  
57  
58  
59  
60
42. Akca O. Pain and Tissue Oxygenation. *Critical care medicine*. 2015;43:e462-463.
  43. Hoiseth LO, Hisdal J, Hoff IE, Hagen OA, Landsverk SA, Kirkeboen KA. Tissue oxygen saturation and finger perfusion index in central hypovolemia: influence of pain. *Crit Care Med*. 2015;43(4):747-756.
  44. MacLeod DB, Ikeda K, Vacchiano C, Lobbestael A, Wahr JA, Shaw AD. Development and validation of a cerebral oximeter capable of absolute accuracy. *Journal of cardiothoracic and vascular anesthesia*. 2012;26(6):1007-1014.
  45. Watzman HM, Kurth CD, Montenegro LM, Rome J, Steven JM, Nicolson SC. Arterial and venous contributions to near-infrared cerebral oximetry. *Anesthesiology*. 2000;93(4):947-953.
  46. Brady K, Joshi B, Zweifel C, et al. Real-time continuous monitoring of cerebral blood flow autoregulation using near-infrared spectroscopy in patients undergoing cardiopulmonary bypass. *Stroke*. 2010;41(9):1951-1956.
  47. Davie SN, Grocott HP. Impact of extracranial contamination on regional cerebral oxygen saturation: a comparison of three cerebral oximetry technologies. *Anesthesiology*. 2012;116(4):834-840.
  48. Akça O, Sessler DI, DeLong D, Keijner R, Ganzel B, Doufas AG. Tissue Oxygenation Response to Mild Hypercapnia during Cardiopulmonary Bypass with Constant Pump Output. *British journal of anaesthesia*. 2006;96(6):708-714.

## Figures

**Figure 1.** CONSORT flow diagram

(Please refer to the attached diagram)

**Figure 2.** Percentage change in cerebral oximetry from baseline ( $\% \Delta rSO_2$ ) over time

(Please refer to the attached diagram)

## Figure Captions

**Figure 1:**

The progress of all participants through the trial displayed by the Consolidated Standards Of Reporting Trials (CONSORT) flow diagram.

**Figure 2:**

The solid lines represent the mean percentage change; while the shaded areas represent the standard deviation. The targeted mild hypercapnia (TMH) group is represented by the red line and the red area; while the targeted normocapnia (TN) group is represented by the blue line and the blue area.

Left: percentage change of regional cerebral oxygen saturation from the baseline on the left hemisphere

Right: percentage change of regional cerebral oxygen saturation from the baseline on the right hemisphere



The progress of all participants through the trial displayed by the Consolidated Standards Of Reporting Trials (CONSORT) flow diagram.

203x287mm (300 x 300 DPI)

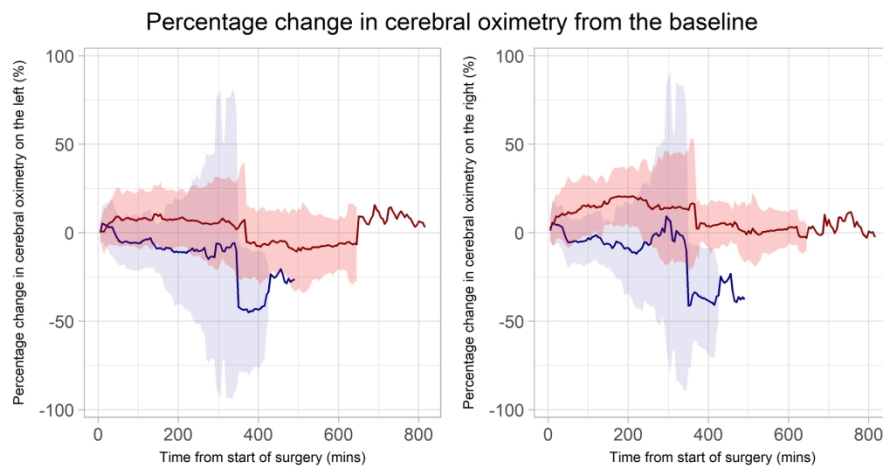

24 The solid lines represent the mean percentage change; while the shaded areas represent the standard  
25 deviation. The targeted mild hypercapnia (TMH) group is represented by the red line and the red area; while  
26 the targeted normocapnia (TN) group is represented by the blue line and the blue area.

27 Left: percentage change of regional cerebral oxygen saturation from the baseline on the left hemisphere  
28 Right: percentage change of regional cerebral oxygen saturation from the baseline on the right hemisphere

29 177x93mm (300 x 300 DPI)

## Supplementary File 1

```
1
2
3
4
5
6
7
8 #-----
9 --
10 # TITLE: Create oximetry database from raw data files
11 # Author: Clarence Wong
12 # Last updated: 2/7/2017
13 # RStudio v. 1.0.136
14 #-----
15 --
16
17 library(readr)
18 require(lubridate)
19 require(TTR)
20 require(xts)
21 require(zoo)
22 library(reshape2)
23
24
25
26 #-----
27 --
28 # Read all data files and save as R object
29 #-----
30 --
31
32
33 master<-0
34 for (i in 1:8)
35 {
36   file <-
37   read.csv(paste("D:/SS/R_data/FINAL_oximetry_data/",as.character(i),".csv",sep=""))
38   master <- rbind(master,file)
39 }
40
41 master$date_time <- paste(master$Date, master$Time..GMT.)
42 master$date_time <- mdy_hms(master$date_time)
43 converted_master <- master[,c(58,3:57)]
44
45
46 save(converted_master,file = "converted_master.RData")
47
48 database_times <- read_csv("D:/SS/R_data/database_times.csv")
49 date_vector <- database_times[,c(1,5,6,7,11,12)]
50
51 date_vector$start_date_time <- mdy_hms(paste(date_vector`Date of
52 surgery`,date_vector`Monitoring Start`))
53 date_vector$end_date_time <- mdy_hms(paste(date_vector`Date of
54 surgery`,date_vector`Monitoring End`))
55
56
57
58
59
60
```

```

1
2
3
4 date_vector$surg_start_date_time <- mdy_hms(paste(date_vector`Date of
5 surgery`,date_vector`Start Time`))
6 date_vector$surg_end_date_time <- mdy_hms(paste(date_vector`Date of
7 surgery`,date_vector`Finish Time`))
8
9
10 converted_date_vector <- date_vector[,c(1,7,8,9,10)]
11
12 save(converted_date_vector,file = "converted_date_vector.RData")
13
14 rm(master,date_vector,file)
15
16
17 #-----
18 --
19 # 1. Convert data types and locate monitoring periods
20 # 2. Identify oximetry values at various time points
21 # 3. Compute percentage change from baseline
22 # 4. Identify and locate problematic data
23 #-----
24 --
25
26
27 minutes_taken_as_baseline <- 2.5
28 minutes_interval <- 5
29
30
31 secs_taken_as_baseline <- minutes_taken_as_baseline*60
32 secs_interval <- minutes_interval*60
33
34 load("converted_master.RData")
35 load("converted_date_vector.RData")
36 print("data loaded. check data version")
37
38
39 oximetry_L <-
40 as.numeric(levels(converted_master$RSO2_A1)[converted_master$RSO2_A1])
41 oximetry_R <-
42 as.numeric(levels(converted_master$RSO2_A2)[converted_master$RSO2_A2])
43 PSI <- as.numeric(levels(converted_master$PSI)[converted_master$PSI])
44
45
46 # monitoring duration
47 duration_mins <-
48 difftime(converted_date_vector$end_date_time,converted_date_vector$start_date_time,uni
49 ts = "mins")
50 duration_secs <-
51 difftime(converted_date_vector$end_date_time,converted_date_vector$start_date_time,uni
52 ts = "secs")
53
54
55 locate_start = seq(-1,-1,length.out = dim(converted_date_vector)[1])
56
57
58
59
60

```

```

1
2
3
4
5 for (i in 1:dim(converted_date_vector)[1]){
6   if(length(which(converted_date_vector$start_date_time[i]==converted_master$date_time))
7     ==1)
8     {
9       locate_start[i] <-
10      which(converted_date_vector$start_date_time[i]==converted_master$date_time)
11    }
12  }
13 }
14
15
16 # create final_oximetry data frame
17 final_oximetry <- data.frame()
18 baseline_L_mu<-baseline_L_std<-baseline_L_N<-baseline_R_mu<-baseline_R_std<-
19 baseline_R_N<-rep(9999,dim(converted_date_vector)[1])
20 num_time_pts <- rep(1,40)
21
22 for(j in 1:dim(converted_date_vector)[1])
23 {
24   # for each patient
25   if(locate_start[j]==-1)
26   {
27     p_id <- j
28     time_id<-minute_from_baseline<-percentage_total_monitoring_period<-L_delta<-
29     L_mu<-L_sig<-L_N<-R_delta<-R_mu<-R_sig<-R_N<-PSI_mu<-9999
30
31
32
33   } else{
34
35     locate_baseline <- locate_start[j]+secs_taken_as_baseline/2
36     locate_times <- seq(0,0)
37     num_measurements <- (as.numeric(duration_secs)[j]-
38 secs_taken_as_baseline)%/%secs_interval + 1
39     num_time_pts[j] <- num_measurements
40     locate_times[1] <- locate_baseline
41     locate_times[2] <- locate_times[1] + secs_interval/2
42     locate_times[2:num_measurements]<-
43 seq(locate_times[2],locate_start[j]+as.numeric(duration_secs[j])/2,by=secs_interval/2)
44     locate_times[num_measurements+1]<-locate_start[j]+as.numeric(duration_secs[j])/2
45
46
47     baseline_L_mu[j] <- mean(oximetry_L[locate_start[j]:(locate_baseline-1)],na.rm =
48 TRUE)
49     baseline_L_std[j] <- sd(oximetry_L[locate_start[j]:(locate_baseline-1)],na.rm = TRUE)
50     baseline_L_N[j] <- length(oximetry_L[locate_start[j]:(locate_baseline-1)])-
51 sum(is.na(oximetry_L[locate_start[j]:(locate_baseline-1)]))
52
53
54
55
56
57
58
59
60

```

```

1
2
3
4     baseline_R_mu[j] <- mean(oximetry_R[locate_start[j]:(locate_baseline-1)],na.rm =
5 TRUE)
6     baseline_R_std[j] <- sd(oximetry_R[locate_start[j]:(locate_baseline-1)],na.rm = TRUE)
7     baseline_R_N[j] <- length(oximetry_R[locate_start[j]:(locate_baseline-1)])-
8 sum(is.na(oximetry_R[locate_start[j]:(locate_baseline-1)]))
9
10
11     L_delta <- L_mu <- L_sig <- L_N <- R_delta <- R_mu <- R_sig <- R_N <- PSI_mu <-
12 seq(0,0)
13
14     for (k in 1:num_measurements)
15     {
16         L_mu[k] <- mean(oximetry_L[locate_times[k]:(locate_times[k+1]-1)],na.rm = TRUE)
17         L_sig[k] <- sd(oximetry_L[locate_times[k]:(locate_times[k+1]-1)],na.rm = TRUE)
18         L_N[k] <- length(oximetry_L[locate_times[k]:(locate_times[k+1]-1)])-
19 sum(is.na(oximetry_L[locate_times[k]:(locate_times[k+1]-1)]))
20
21         R_mu[k] <- mean(oximetry_R[locate_times[k]:(locate_times[k+1]-1)],na.rm = TRUE)
22         R_sig[k] <- sd(oximetry_R[locate_times[k]:(locate_times[k+1]-1)],na.rm = TRUE)
23         R_N[k] <- length(oximetry_R[locate_times[k]:(locate_times[k+1]-1)])-
24 sum(is.na(oximetry_R[locate_times[k]:(locate_times[k+1]-1)]))
25
26         PSI_mu[k] <- mean(PSI[locate_times[k]:(locate_times[k+1]-1)],na.rm = TRUE)
27     }
28
29     L_delta <- (L_mu/baseline_L_mu[j] - 1)*100
30     R_delta <- (R_mu/baseline_R_mu[j] - 1)*100
31
32     time_id <- 1:num_measurements
33     minute_from_baseline <- c(seq(minutes_interval,minutes_interval*(num_measurements-
34 1), by = minutes_interval),as.numeric(duration_mins[j]-minutes_taken_as_baseline))
35     p_id <- rep(j,num_measurements)
36     percentage_total_monitoring_period <-
37 ((minute_from_baseline*60+secs_taken_as_baseline)/as.numeric(duration_secs[j]))*100
38
39     }
40
41     temp_df <-
42 data.frame(p_id,time_id,minute_from_baseline,percentage_total_monitoring_period,L_delt
43 a,L_mu,L_sig,L_N,R_delta,R_mu,R_sig,R_N,PSI_mu)
44     final_oximetry <- rbind(final_oximetry,temp_df)
45     rm(temp_df)
46
47 }
48
49 missing_L <- unique(final_oximetry$p_id[is.na(final_oximetry$L_delta)])
50
51
52
53
54
55
56
57
58
59
60

```



```
1
2
3
4 missing_R <- unique(final_oximetry$p_id[is.na(final_oximetry$R_delta)])
5 percentage_total_missing_L <-
6 100*(rle(final_oximetry$p_id[is.na(final_oximetry$L_delta)])$lengths) /
7 (num_time_pts[unique(final_oximetry$p_id[is.na(final_oximetry$L_delta)])])
8 percentage_total_missing_R <-
9 100*(rle(final_oximetry$p_id[is.na(final_oximetry$R_delta)])$lengths) /
10 (num_time_pts[unique(final_oximetry$p_id[is.na(final_oximetry$R_delta)])])
11 missing_data <- unique(final_oximetry$p_id[(final_oximetry$L_delta==9999)])
12 missing_data <- missing_data[!is.na(missing_data)]
13 missing_PSI <- unique(final_oximetry$p_id[is.na(final_oximetry$PSI_mu)])
14 percentage_total_missing_PSI <-
15 100*(rle(final_oximetry$p_id[is.na(final_oximetry$PSI_mu)])$lengths) /
16 (num_time_pts[unique(final_oximetry$p_id[is.na(final_oximetry$PSI_mu)])])
17
18
19
20 print("there are missing delta oximetry values in the following patients")
21 print(missing_L)
22 print(percentage_total_missing_L)
23
24
25 print(missing_R)
26 print(percentage_total_missing_R)
27
28
29 print(missing_data)
30
31 print("there are missing PSI values in the following patients")
32 print(missing_PSI)
33 print(percentage_total_missing_PSI)
34
35
36 other_data <-
37 data.frame(num_time_pts,baseline_L_mu,baseline_L_std,baseline_L_N,baseline_R_mu,
38 baseline_R_std,baseline_R_N)
39 other_data[is.na(other_data)]<-9999
40 save(other_data, file="other_data.RData")
41
42 final_oximetry[is.na(final_oximetry)]<-9999
43 save(final_oximetry,file = "final_oximetry.RData")
44
45
46
47 #-----
48 --
49 # 1. Convert baseline characteristic database from wide to long format
50 # 2. Incorporating oximetry data in the database with time as a nested data in the hierarchy
51 # 3. Create final database
52 #-----
53
54 --
55
56
57
58
59
```

```
1
2
3
4 load("final_oximetry.RData")
5 load("other_data.RData")
6 print("check if final oximetry is latest")
7
8
9 baseline_results <- read.csv("D:/SS/R_data/FINAL_oximetry_data/all_baseline.csv",
10 sep=",", stringsAsFactors=FALSE)
11
12 baseline_results$baseline_L_mu <- other_data$baseline_L_mu
13 baseline_results$baseline_L_std <- other_data$baseline_L_std
14 baseline_results$baseline_L_N <- other_data$baseline_L_N
15 baseline_results$baseline_R_mu <- other_data$baseline_R_mu
16 baseline_results$baseline_R_std <- other_data$baseline_R_std
17 baseline_results$baseline_R_N <- other_data$baseline_R_N
18
19
20 baseline_results$P_id <- index(baseline_results)
21
22
23 baseline_results[baseline_results == "#N/A"]<-9999
24
25 #generate baseline_results with the same number of rows as final oximetry
26 baseline_results <- baseline_results[rep(seq_len((40)),num_time_pts),]
27
28
29
30 all_results <- cbind(baseline_results,final_oximetry)
31 if (sum(1*(all_results$P_id != all_results$p_id))==0)
32 {
33   all_results <- all_results[,c(which(colnames(all_results)=="p_id"),1:109,112:122)]
34 }
35
36
37 save(all_results,file = "all_results.RData")
38
39 #UNCOMMENT TO WRITE CSV
40 #-----
41 write.csv(all_results, file="all_results.csv")
42
43
44
45
46
47
48
49
50
51
52
53
54
55
56
57
58
59
```

## Supplementary File 2

```
1
2
3
4
5
6
7
8 #-----
9 -----
10 # TITLE: Create baseline patient and surgical characteristics table, oximetry table, and
11 oximetry graphs
12 # Author: Clarence Wong
13 # Last updated: 2/7/2017
14 # RStudio v. 1.0.136
15 #-----
16 -----
17
18
19 library(readr)
20 require(lubridate)
21 require(TTR)
22 require(xts)
23 require(zoo)
24 require(tableone)
25 require(ggplot2)
26 library(grid)
27 require(gridExtra)
28 require(quantreg)
29
30
31 #-----
32 -----
33
34 # 1. Create summary statistics for baseline characteristics
35 # 2. Perform statistical analysis on secondary outcomes. e.g post-operative delirium
36 # 3. Export tables in csv files
37 # Requires baseline characteristic and baseline oximetry data.
38 #-----
39 -----
40
41
42 baseline_db <- read.csv("D:/SS/R_data/baseline/all_baseline.csv", sep=",",
43 stringsAsFactors=TRUE)
44 load("other_data.RData")
45
46
47 other_data <- other_data[-c(1,2),]
48
49
50 baseline_db$baseline_L_mu <- other_data$baseline_L_mu
51 baseline_db$baseline_L_std <- other_data$baseline_L_std
52 baseline_db$baseline_L_N <- other_data$baseline_L_N
53 baseline_db$baseline_R_mu <- other_data$baseline_R_mu
54 baseline_db$baseline_R_std <- other_data$baseline_R_std
55 baseline_db$baseline_R_N <- other_data$baseline_R_N
56
57
58 baseline_db$P_id <- index(baseline_db)
59
60
```

```

1
2
3
4 baseline_db[baseline_db == "#N/A"]<-NA
5 baseline_db[baseline_db == 9999]<-NA
6 baseline_db$pCO2_2<-
7 as.numeric(levels(baseline_db$pCO2_2))[baseline_db$pCO2_2]
8 baseline_db$BMI<-as.numeric(levels(baseline_db$BMI))[baseline_db$BMI]
9 vars <-
10 c("Gender","Age","Weight","BMI","ASA","Diabetes","COPD","Malignancy","Other_C
11 omorbidities",
12 "Surgery_type","Duration_Surgery_Minutes","baseline_L_mu","baseline_R_mu")
13
14 factorVars <- c("ASA","Diabetes","COPD","Malignancy","Other_Comorbidities")
15 Tableone <- CreateTableOne(vars,"Group",baseline_db,factorVars)
16
17
18
19
20 baseline_db$LOS<-as.numeric(levels(baseline_db$LOS))[baseline_db$LOS]
21 baseline_db$pH_2<-as.numeric(levels(baseline_db$pH_2))[baseline_db$pH_2]
22 baseline_db$HCO3._2<-
23 as.numeric(levels(baseline_db$HCO3._2))[baseline_db$HCO3._2]
24 baseline_db$Base_excess_2<-
25 as.numeric(levels(baseline_db$Base_excess_2))[baseline_db$Base_excess_2]
26 baseline_db$Potassium_2<-
27 as.numeric(levels(baseline_db$Potassium_2))[baseline_db$Potassium_2]
28 baseline_db$Total_Hb_2<-
29 as.numeric(levels(baseline_db$Total_Hb_2))[baseline_db$Total_Hb_2]
30
31
32
33 baseline_db$pH<-apply(baseline_db[,c("pH_1","pH_2")],1,mean,na.rm=TRUE)
34 baseline_db$pCO2<-
35 apply(baseline_db[,c("pCO2_1","pCO2_2")],1,mean,na.rm=TRUE)
36 baseline_db$HCO3.<-
37 apply(baseline_db[,c("HCO3._1","HCO3._2")],1,mean,na.rm=TRUE)
38 baseline_db$Base_excess<-
39 apply(baseline_db[,c("Base_excess_1","Base_excess_2")],1,mean,na.rm=TRUE)
40 baseline_db$Potassium<-
41 apply(baseline_db[,c("Potassium_1","Potassium_2")],1,mean,na.rm=TRUE)
42 baseline_db$Total_Hb<-
43 apply(baseline_db[,c("Total_Hb_1","Total_Hb_2")],1,mean,na.rm=TRUE)
44
45
46
47 vars_2 <-
48 c("Surgery_type","Duration_Surgery_Minutes","baseline_L_mu","baseline_R_mu","L
49 OS",
50
51 "pH","pCO2","HCO3.","Base_excess","Potassium","Total_Hb","post_op_delirium")
52 factorVars_2 <- c("post_op_delirium")
53 Tabletwo <- CreateTableOne(vars_2,"Group",baseline_db,factorVars_2,argsExact =
54 "post_op_delirium")
55
56
57 print(Tabletwo,exact = "post_op_delirium",nonnormal =
58 c("Duration_Surgery_Minutes","baseline_L_mu","baseline_R_mu",
59
60

```

```

1
2
3
4
5 "LOS", "pH", "pCO2", "HCO3.", "Base_excess", "Potassium", "Total_Hb"))
6
7
8
9 write.csv(print(Tabletwo, exact = "post_op_delirium", nonnormal =
10 c("Duration_Surgery_Minutes", "baseline_L_mu",
11
12 "baseline_R_mu", "LOS", "pH", "pCO2", "HCO3.",
13 "Base_excess", "Potassium", "Total_Hb")),
14 "Table_Two.csv")
15
16
17 #-----
18 -----
19 # 1. Create summary statistics for percentage change of regional cerebral oxygen
20 saturation
21 # 2. Create plots for regional cerebral oxygen saturation over time
22 # 3. Export oximetry tables in csv files
23 # Requires baseline characteristic and baseline oximetry data.
24 #-----
25 -----
26
27
28 #-----
29 -----
30
31 # Normocapnic group
32
33 plot_db <- read.csv("D:/SS/R_data/oximetry/MASTER_results_deleted_missing.csv",
34 sep=",", stringsAsFactors=TRUE)
35
36 plot_db[plot_db == "#N/A"] <- NA
37 plot_db[plot_db == 9999] <- NA
38
39
40 normocapnia <- subset(plot_db, Group %in% 0)
41 hypercapnia <- subset(plot_db, Group %in% 1)
42
43 normo_plot <- ggplot(normocapnia, aes(x=minute_from_baseline, y=L_delta,
44 group=p_id)) + geom_line() + geom_point()+
45 ggtitle("normocapnia: L delta")+ xlab("Time since start of operation (mins)")+
46 ylab("% change in oximetry from baseline")
47
48
49 hyper_plot <- ggplot(hypercapnia, aes(x=minute_from_baseline, y=L_delta,
50 group=p_id)) + geom_line() + geom_point()+
51 ggtitle("hypercapnia: L delta")+ xlab("Time since start of operation (mins)")+ ylab("%
52 change in oximetry from baseline")
53
54
55 means <- tapply(normocapnia$L_delta, normocapnia$time_id, function(x) mean(x, na.rm
56 = TRUE))
57 stdevs <- tapply(normocapnia$L_delta, normocapnia$time_id, function(x) sd(x, na.rm =
58 TRUE))
59
60

```

```

1
2
3
4 N <- tapply(normocapnia$L_delta,normocapnia$time_id,function(x)
5 length(x[!is.na(x)]))
6
7
8 normo_df_L <- data.frame(means,stdevs)
9 times<- index(normo_df_L)*5
10 normo_df_L <- data.frame(means,stdevs,N, times)
11 total_normo_L <- ggplot(normo_df_L, aes(x=times, y=means)) +
12 geom_line(colour="blue4") +
13   geom_ribbon(normo_df_L,mapping = aes(x=times,
14 ymax=means+stdevs,ymin=means-stdevs),fill="blue4",alpha=0.1)
15
16
17 means <- tapply(normocapnia$R_delta,normocapnia$time_id,function(x) mean(x,
18 na.rm = TRUE))
19 stdevs <- tapply(normocapnia$R_delta,normocapnia$time_id,function(x) sd(x, na.rm =
20 TRUE))
21 N <- tapply(normocapnia$R_delta,normocapnia$time_id,function(x)
22 length(x[!is.na(x)]))
23
24
25 normo_df_R <- data.frame(means,stdevs)
26 times<- index(normo_df_R)*5
27 normo_df_R <- data.frame(means,stdevs,N, times)
28 total_normo_R <- ggplot(normo_df_R, aes(x=times, y=means)) +
29 geom_line(colour="blue4") +
30   geom_ribbon(normo_df_R,mapping = aes(x=times,
31 ymax=means+stdevs,ymin=means-stdevs),fill="blue4",alpha=0.1)
32
33
34 #-----
35 -----
36 # Hypercapnic group
37
38
39 means <- tapply(hypercapnia$L_delta,hypercapnia$time_id,function(x) mean(x, na.rm
40 = TRUE))
41 stdevs <- tapply(hypercapnia$L_delta,hypercapnia$time_id,function(x) sd(x, na.rm =
42 TRUE))
43 N <- tapply(hypercapnia$L_delta,hypercapnia$time_id,function(x) length(x[!is.na(x)]))
44
45
46 hyper_df_L <- data.frame(means,stdevs)
47 times<- index(hyper_df_L)*5
48 hyper_df_L <- data.frame(means,stdevs,N, times)
49 total_hyper_L <- ggplot(hyper_df_L, aes(x=times, y=means))
50
51
52 means <- tapply(hypercapnia$R_delta,hypercapnia$time_id,function(x) mean(x, na.rm
53 = TRUE))
54 stdevs <- tapply(hypercapnia$R_delta,hypercapnia$time_id,function(x) sd(x, na.rm =
55 TRUE))
56 N <- tapply(hypercapnia$R_delta,hypercapnia$time_id,function(x) length(x[!is.na(x)]))
57
58
59 hyper_df_R <- data.frame(means,stdevs)
60

```

```

1
2
3
4 times<- index(hyper_df_R)*5
5 hyper_df_R <- data.frame(means,stdevs,N, times)
6 total_hyper_R <- ggplot(hyper_df_R, aes(x=times, y=means))
7
8
9 total_L <- total_normo_L +
10   geom_ribbon(hyper_df_L,mapping = aes(x=times, ymax=means+stdevs,ymin=means-
11   stdevs),fill="red2",alpha=0.2) +
12   geom_line(hyper_df_L,mapping = aes(x=times, y=means),colour="red4") +
13   theme_light() +
14   xlab("Time since start of surgery (mins)")+ ylab("Average % change in cerebral
15   oximetry on the left") +
16   theme(axis.title.y = element_text(size = rel(0.65), angle = 90)) +
17   theme(axis.title.x = element_text(size = rel(0.65), angle = 00))
18
19
20 total_R <- total_normo_R +
21   geom_ribbon(hyper_df_R,mapping = aes(x=times, ymax=means+stdevs,ymin=means-
22   stdevs),fill="red2",alpha=0.2) +
23   geom_line(hyper_df_R,mapping = aes(x=times, y=means),colour="red4")+
24   theme_light() +
25   xlab("Time since start of surgery (mins)")+ ylab("Average % change in cerebral
26   oximetry on the right") +
27   scale_color_manual(values=c("red4","blue4"))+
28   theme(axis.title.y = element_text(size = rel(0.65), angle = 90)) +
29   theme(axis.title.x = element_text(size = rel(0.65), angle = 00))
30
31
32
33 #tiff('oximetry_graph_high_res.tiff', units="in", width=7, height=3.6667, res=600,
34   compression = 'lzw')
35
36
37 grid.arrange(total_L, total_R, ncol = 2, top=textGrob("Percentage change in cerebral
38   oximetry from baseline",
39   gp=gpar(fontsize=11,fontfamily="Times")),
40   vp=viewport(width=0.9, height=0.9))
41
42 #insert ggplot code
43 #dev.off()
44
45 temp_hyper_L <- t(paste(round(hyper_df_L$mean,1)," (",
46   round(hyper_df_L$stdev,1),")", " {" , hyper_df_L$N, " }", sep = ""))
47 temp_normo_L <- t(paste(round(normo_df_L$mean,1)," (",
48   round(normo_df_L$stdev,1),")", " {" , normo_df_L$N, " }", sep = ""))
49
50
51 temp_hyper_R <- t(paste(round(hyper_df_R$mean,1)," (",
52   round(hyper_df_R$stdev,1),")", " {" , hyper_df_R$N, " }", sep = ""))
53 temp_normo_R <- t(paste(round(normo_df_R$mean,1)," (",
54   round(normo_df_R$stdev,1),")", " {" , normo_df_R$N, " }", sep = ""))
55
56
57 write.csv( temp_normo_L , "normo_df_L.csv")
58 write.csv( temp_normo_R , "normo_df_R.csv")
59
60

```

```
1  
2  
3  
4 write.csv( temp_hyper_L , "hyper_df_L.csv")  
5 write.csv( temp_hyper_R , "hyper_df_R.csv")  
6  
7  
8  
9  
10  
11  
12  
13  
14  
15  
16  
17  
18  
19  
20  
21  
22  
23  
24  
25  
26  
27  
28  
29  
30  
31  
32  
33  
34  
35  
36  
37  
38  
39  
40  
41  
42  
43  
44  
45  
46  
47  
48  
49  
50  
51  
52  
53  
54  
55  
56  
57  
58  
59  
60
```

For peer review only





## CONSORT 2010 checklist of information to include when reporting a randomised trial\*

| Section/Topic                    | Item No | Checklist item                                                                                                                                                                              | Reported on page No |
|----------------------------------|---------|---------------------------------------------------------------------------------------------------------------------------------------------------------------------------------------------|---------------------|
| <b>Title and abstract</b>        |         |                                                                                                                                                                                             |                     |
|                                  | 1a      | Identification as a randomised trial in the title                                                                                                                                           | 1                   |
|                                  | 1b      | Structured summary of trial design, methods, results, and conclusions (for specific guidance see CONSORT for abstracts)                                                                     | 2                   |
| <b>Introduction</b>              |         |                                                                                                                                                                                             |                     |
| Background and objectives        | 2a      | Scientific background and explanation of rationale                                                                                                                                          | 5                   |
|                                  | 2b      | Specific objectives or hypotheses                                                                                                                                                           | 5                   |
| <b>Methods</b>                   |         |                                                                                                                                                                                             |                     |
| Trial design                     | 3a      | Description of trial design (such as parallel, factorial) including allocation ratio                                                                                                        | 6                   |
|                                  | 3b      | Important changes to methods after trial commencement (such as eligibility criteria), with reasons                                                                                          | 6                   |
| Participants                     | 4a      | Eligibility criteria for participants                                                                                                                                                       | 6                   |
|                                  | 4b      | Settings and locations where the data were collected                                                                                                                                        | 6                   |
| Interventions                    | 5       | The interventions for each group with sufficient details to allow replication, including how and when they were actually administered                                                       | 6-8                 |
| Outcomes                         | 6a      | Completely defined pre-specified primary and secondary outcome measures, including how and when they were assessed                                                                          | 7-9                 |
|                                  | 6b      | Any changes to trial outcomes after the trial commenced, with reasons                                                                                                                       | N/A                 |
| Sample size                      | 7a      | How sample size was determined                                                                                                                                                              | 10                  |
|                                  | 7b      | When applicable, explanation of any interim analyses and stopping guidelines                                                                                                                | N/A                 |
| <b>Randomisation:</b>            |         |                                                                                                                                                                                             |                     |
| Sequence generation              | 8a      | Method used to generate the random allocation sequence                                                                                                                                      | 6                   |
|                                  | 8b      | Type of randomisation; details of any restriction (such as blocking and block size)                                                                                                         | 6                   |
| Allocation concealment mechanism | 9       | Mechanism used to implement the random allocation sequence (such as sequentially numbered containers), describing any steps taken to conceal the sequence until interventions were assigned | 6                   |
| Implementation                   | 10      | Who generated the random allocation sequence, who enrolled participants, and who assigned participants to interventions                                                                     | 6-7                 |
| Blinding                         | 11a     | If done, who was blinded after assignment to interventions (for example, participants, care providers, those                                                                                | 6-7                 |

|    |                          |                                                             |                                                                                                                  |
|----|--------------------------|-------------------------------------------------------------|------------------------------------------------------------------------------------------------------------------|
| 1  |                          | assessing outcomes) and how                                 |                                                                                                                  |
| 2  | 11b                      | If relevant, description of the similarity of interventions | 9                                                                                                                |
| 3  | Statistical methods      | 12a                                                         | Statistical methods used to compare groups for primary and secondary outcomes                                    |
| 4  |                          | 12b                                                         | Methods for additional analyses, such as subgroup analyses and adjusted analyses                                 |
| 5  |                          |                                                             |                                                                                                                  |
| 6  | <b>Results</b>           |                                                             |                                                                                                                  |
| 7  | Participant flow (a      | 13a                                                         | For each group, the numbers of participants who were randomly assigned, received intended treatment, and         |
| 8  | diagram is strongly      |                                                             | were analysed for the primary outcome                                                                            |
| 9  | recommended)             | 13b                                                         | For each group, losses and exclusions after randomisation, together with reasons                                 |
| 10 | Recruitment              | 14a                                                         | Dates defining the periods of recruitment and follow-up                                                          |
| 11 |                          | 14b                                                         | Why the trial ended or was stopped                                                                               |
| 12 |                          |                                                             |                                                                                                                  |
| 13 | Baseline data            | 15                                                          | A table showing baseline demographic and clinical characteristics for each group                                 |
| 14 | Numbers analysed         | 16                                                          | For each group, number of participants (denominator) included in each analysis and whether the analysis was      |
| 15 |                          |                                                             | by original assigned groups                                                                                      |
| 16 |                          |                                                             |                                                                                                                  |
| 17 | Outcomes and             | 17a                                                         | For each primary and secondary outcome, results for each group, and the estimated effect size and its            |
| 18 | estimation               |                                                             | precision (such as 95% confidence interval)                                                                      |
| 19 |                          | 17b                                                         | For binary outcomes, presentation of both absolute and relative effect sizes is recommended                      |
| 20 | Ancillary analyses       | 18                                                          | Results of any other analyses performed, including subgroup analyses and adjusted analyses, distinguishing       |
| 21 |                          |                                                             | pre-specified from exploratory                                                                                   |
| 22 |                          |                                                             |                                                                                                                  |
| 23 | Harms                    | 19                                                          | All important harms or unintended effects in each group (for specific guidance see CONSORT for harms)            |
| 24 |                          |                                                             |                                                                                                                  |
| 25 | <b>Discussion</b>        |                                                             |                                                                                                                  |
| 26 | Limitations              | 20                                                          | Trial limitations, addressing sources of potential bias, imprecision, and, if relevant, multiplicity of analyses |
| 27 | Generalisability         | 21                                                          | Generalisability (external validity, applicability) of the trial findings                                        |
| 28 | Interpretation           | 22                                                          | Interpretation consistent with results, balancing benefits and harms, and considering other relevant evidence    |
| 29 |                          |                                                             |                                                                                                                  |
| 30 | <b>Other information</b> |                                                             |                                                                                                                  |
| 31 | Registration             | 23                                                          | Registration number and name of trial registry                                                                   |
| 32 | Protocol                 | 24                                                          | Where the full trial protocol can be accessed, if available                                                      |
| 33 | Funding                  | 25                                                          | Sources of funding and other support (such as supply of drugs), role of funders                                  |
| 34 |                          |                                                             |                                                                                                                  |
| 35 |                          |                                                             |                                                                                                                  |

36  
37 \*We strongly recommend reading this statement in conjunction with the CONSORT 2010 Explanation and Elaboration for important clarifications on all the items. If relevant, we also  
38 recommend reading CONSORT extensions for cluster randomised trials, non-inferiority and equivalence trials, non-pharmacological treatments, herbal interventions, and pragmatic trials.  
39 Additional extensions are forthcoming: for those and for up to date references relevant to this checklist, see [www.consort-statement.org](http://www.consort-statement.org).  
40  
41  
42

# BMJ Open

## A randomised controlled trial to investigate the relationship between mild hypercapnia and cerebral oxygen saturation in patients undergoing major surgery

|                                 |                                                                                                                                                                                                                                                                                                                                                                                                                                                                                                                                                                                                                                                                                                                                                                                                      |
|---------------------------------|------------------------------------------------------------------------------------------------------------------------------------------------------------------------------------------------------------------------------------------------------------------------------------------------------------------------------------------------------------------------------------------------------------------------------------------------------------------------------------------------------------------------------------------------------------------------------------------------------------------------------------------------------------------------------------------------------------------------------------------------------------------------------------------------------|
| Journal:                        | <i>BMJ Open</i>                                                                                                                                                                                                                                                                                                                                                                                                                                                                                                                                                                                                                                                                                                                                                                                      |
| Manuscript ID                   | bmjopen-2019-029159.R3                                                                                                                                                                                                                                                                                                                                                                                                                                                                                                                                                                                                                                                                                                                                                                               |
| Article Type:                   | Original research                                                                                                                                                                                                                                                                                                                                                                                                                                                                                                                                                                                                                                                                                                                                                                                    |
| Date Submitted by the Author:   | 27-Dec-2019                                                                                                                                                                                                                                                                                                                                                                                                                                                                                                                                                                                                                                                                                                                                                                                          |
| Complete List of Authors:       | Wong, Clarence; Austin Hospital, Department of Anaesthesia<br>Churilov, Leonid; The Florey Institute of Neuroscience and Mental Health; University of Melbourne<br>Cowie, Dean; Austin Hospital, Department of Anaesthesia<br>Tan, Chong; Austin Hospital, Department of Anaesthesia<br>Hu, Raymond; Austin Hospital, Department of Anaesthesia<br>Tremewen, David; Austin Hospital, Department of Anaesthesia<br>Pearce, Brett; Austin Hospital, Department of Anaesthesia<br>Pillai, Param; Austin Hospital, Department of Anaesthesia<br>Karalipillai, Dharshi; Austin Hospital, Department of Anaesthesia<br>Bellomo, Rinaldo; Austin Hospital, Department of Intensive Care; University of Melbourne<br>Weinberg, Laurence; Austin Hospital, Department of Anaesthesia; University of Melbourne |
| <b>Primary Subject Heading</b>: | Anaesthesia                                                                                                                                                                                                                                                                                                                                                                                                                                                                                                                                                                                                                                                                                                                                                                                          |
| Secondary Subject Heading:      | Evidence based practice, Health informatics                                                                                                                                                                                                                                                                                                                                                                                                                                                                                                                                                                                                                                                                                                                                                          |
| Keywords:                       | hypercapnia, oximetry, Spectroscopy, Near-Infrared, Respiration, Artificial, Delirium                                                                                                                                                                                                                                                                                                                                                                                                                                                                                                                                                                                                                                                                                                                |
|                                 |                                                                                                                                                                                                                                                                                                                                                                                                                                                                                                                                                                                                                                                                                                                                                                                                      |

SCHOLARONE™  
Manuscripts



I, the Submitting Author has the right to grant and does grant on behalf of all authors of the Work (as defined in the below author licence), an exclusive licence and/or a non-exclusive licence for contributions from authors who are: i) UK Crown employees; ii) where BMJ has agreed a CC-BY licence shall apply, and/or iii) in accordance with the terms applicable for US Federal Government officers or employees acting as part of their official duties; on a worldwide, perpetual, irrevocable, royalty-free basis to BMJ Publishing Group Ltd ("BMJ") its licensees and where the relevant Journal is co-owned by BMJ to the co-owners of the Journal, to publish the Work in this journal and any other BMJ products and to exploit all rights, as set out in our [licence](#).

The Submitting Author accepts and understands that any supply made under these terms is made by BMJ to the Submitting Author unless you are acting as an employee on behalf of your employer or a postgraduate student of an affiliated institution which is paying any applicable article publishing charge ("APC") for Open Access articles. Where the Submitting Author wishes to make the Work available on an Open Access basis (and intends to pay the relevant APC), the terms of reuse of such Open Access shall be governed by a Creative Commons licence – details of these licences and which [Creative Commons](#) licence will apply to this Work are set out in our licence referred to above.

Other than as permitted in any relevant BMJ Author's Self Archiving Policies, I confirm this Work has not been accepted for publication elsewhere, is not being considered for publication elsewhere and does not duplicate material already published. I confirm all authors consent to publication of this Work and authorise the granting of this licence.

1  
2  
3  
4  
5 **A randomised controlled trial to investigate the relationship between mild hypercapnia**  
6 **and cerebral oxygen saturation in patients undergoing major surgery**  
7  
8  
9

10 **Authors:** Clarence Wong<sup>1,2</sup>, Leonid Churilov<sup>2,3</sup>, Dean Cowie<sup>1</sup>, Chong Tan<sup>1</sup>, Raymond Hu<sup>1</sup>,  
11 David Tremewen<sup>1</sup>, Brett Pearce<sup>1</sup>, Param Pillai<sup>1</sup>, Dharshi Karalipillai<sup>1</sup>, Rinaldo Bellomo<sup>1,2</sup>,  
12 Laurence Weinberg<sup>1,2</sup>  
13

- 14  
15 1. Department of Anaesthesia, Austin Hospital, Heidelberg, Victoria, Australia;  
16  
17 2. University of Melbourne, Parkville, Victoria, Australia;  
18  
19 3. The Florey Institute of Neuroscience and Mental Health, Heidelberg, Victoria, Australia  
20  
21  
22  
23

24 **Correspondence**

25 A/Prof Laurence Weinberg

26 Department of Anaesthesia, Austin Hospital

27 145 Studley Road, Heidelberg, Victoria 3084, Australia

28 Phone number: (61) 03 94965000

29 Email: [laurence.weinberg@austin.org.au](mailto:laurence.weinberg@austin.org.au)  
30  
31  
32  
33  
34  
35  
36

37 **Word Count**

38 Abstract: 304

39 Introduction: 311

40 Methods: 2008

41 Results: 802

42 Discussion: 1674

43 Conclusion: 43

44 Body text: 4838  
45  
46  
47  
48  
49  
50  
51  
52  
53  
54  
55  
56  
57  
58  
59  
60

## **Abstract**

**Objectives:** The effects of hypercapnia on regional cerebral oxygen saturation (rSO<sub>2</sub>) during surgery are unclear. We conducted a randomised controlled trial to investigate the relationship between mild hypercapnia and rSO<sub>2</sub>. We hypothesised that, compared with targeted normocapnia (TN), targeted mild hypercapnia (TMH) during major surgery would increase rSO<sub>2</sub>.

**Design:** A prospective, randomised, controlled trial in adult participants undergoing elective major surgery.

**Setting:** A single tertiary centre in Heidelberg, Victoria, Australia.

**Participants:** 40 participants were randomised to either a TMH or TN group (20 to each).

**Interventions:** TMH (partial pressure of carbon dioxide in arterial blood, PaCO<sub>2</sub>, 45-55 mmHg) or TN (PaCO<sub>2</sub> 35-40 mmHg) was delivered via controlled ventilation throughout surgery.

**Primary and secondary outcome measures:** The primary endpoint was the absolute difference between the two groups in percentage change in rSO<sub>2</sub> from baseline to completion of surgery. Secondary endpoints included intra-operative pH, bicarbonate concentration, base excess, serum potassium concentration, incidence of postoperative delirium, and length of stay (LOS) in hospital.

**Results:** The absolute difference between the two groups in percentage change in rSO<sub>2</sub> from the baseline to the completion of surgery was 19.0% higher in both hemispheres with TMH ( $P<0.001$ ). On both sides, the percentage change in rSO<sub>2</sub> was greater in the TMH group than the TN group throughout the duration of surgery. The difference between the groups became more noticeable over time. Furthermore, postoperative delirium was higher in the TN group (risk difference 0.3, 95% CI [0.1 to 0.5],  $P=0.02$ ). Length of stay was similar between groups (5 days vs. 5 days;  $P=0.99$ ).

1  
2  
3 **Conclusion:** TMH was associated with a stable increase in rSO<sub>2</sub> from the baseline, while TN  
4 was associated with a decrease in rSO<sub>2</sub> in both hemispheres in patients undergoing major  
5 surgery. This resulted in a clear separation of percentage change in rSO<sub>2</sub> from the baseline  
6 between TMH and TN over time. Our findings provide the rationale for larger studies on  
7 TMH during surgery.  
8  
9  
10  
11  
12

13  
14 **Clinical trial registration:** The Australian New Zealand Clinical Trials Registry,  
15 unique identification number: ACTRN12616000320459  
16  
17

18  
19 **Keywords:** Hypercapnia; Oximetry; Spectroscopy, Near-Infrared; Respiration, Artificial;  
20 Delirium  
21  
22  
23  
24  
25  
26  
27  
28  
29  
30  
31  
32  
33  
34  
35  
36  
37  
38  
39  
40  
41  
42  
43  
44  
45  
46  
47  
48  
49  
50  
51  
52  
53  
54  
55  
56  
57  
58  
59  
60

## **Article Summary**

### *Strengths of this study*

- High internal validity due to blinding and random allocation to groups
- Frequent sampling of oximetry data throughout monitoring period
- Non-invasive nature of near-infrared spectroscopy (NIRS) cerebral oximetry for regional cerebral oxygen saturation (rSO<sub>2</sub>) measurements

### *Limitations of this study*

- Study findings do not apply to emergency surgeries, intra-cranial surgeries, or surgeries requiring one lung ventilation.
- Interpretation of rSO<sub>2</sub> depends on an assumption that rSO<sub>2</sub> is the same in different regions of the brain.

## **Acknowledgement**

### **Funding Statement**

Masimo provided the oximetry sensors used for this trial. This study conception, design, trial management, data collection, data analysis, and the writing of the manuscript, have been executed completely independently of Masimo and any other external organisations. This work was supported by the Department of Anaesthesia Research Fund, Austin Hospital, Heidelberg, Victoria, Australia.

### **Declaration of interest**

All authors declare no conflict of interest.

### **Presentation**

Findings of this study were presented as a poster presentation at the PostGraduate Assembly in Anesthesiology held during 8-12<sup>th</sup> December 2018 at New York, United States of America.

### **Data sharing statement**

De-identified participant data are available upon reasonable request.



## **Introduction**

In patients undergoing major surgery, the effects of mild hypercapnia on regional cerebral oxygen saturation (rSO<sub>2</sub>) have not been fully examined, and any beneficial or harmful effects of hypercapnia as a therapeutic ventilation strategy to improve cerebral oxygenation are unknown. In animal models, CO<sub>2</sub> is a well-known vasodilator, improving cerebral blood flow.<sup>1-3</sup> The neuroprotective mechanisms of mild hypercapnia, whilst not completely understood, have been postulated to be a result of an increase in cerebral blood flow, enhancement of oxygen delivery, improvements in cerebral glucose utilisation and oxidative metabolism,<sup>4,5</sup> and activation of adenosine triphosphate (ATP)-sensitive potassium channels to maintain normal neuronal activity in the setting of ischemia.<sup>6</sup>

The recent emergence of near-infrared spectroscopy (NIRS) cerebral oximetry has provided a practical method to measure rSO<sub>2</sub> continuously and non-invasively. This technology has gained substantial supportive evidence in resuscitation, critical care, and surgical applications.<sup>7-9</sup> Numerous studies have shown that NIRS can be applied clinically in the resuscitation and cardiac surgery settings, where cerebral desaturation events can be both effectively monitored and managed.<sup>10-13</sup> However, whilst absolute and relative saturation thresholds theoretically requiring prompt interventions have been proposed,<sup>14</sup> these thresholds have not been validated, and there is a lack of consensus on the indication and timing of interventions. In patients undergoing surgery, rSO<sub>2</sub> was reported to be higher with mild hypercapnia, however, the intra-operative temporal relationship between rSO<sub>2</sub> and mild hypercapnia remains unclear.<sup>15</sup>

Accordingly, we conducted a randomised controlled trial to test the hypothesis that targeted mild hypercapnia (TMH), defined as the partial pressure of carbon dioxide in arterial blood (PaCO<sub>2</sub>) between 45 and 55 mmHg, during elective major surgery would increase cerebral oxygen saturation compared to targeted normocapnia (TN), defined as PaCO<sub>2</sub> between 35 and 40 mmHg. As a secondary aim, we evaluated whether TMH would affect the development of postoperative delirium, a commonly reported complication that is linked to functional decline, institutionalisation, and higher mortality.<sup>16-18</sup>

## **Methods**

### *Ethics approval and clinical trial registration*

The study was approved by the Austin Health Research and Ethics Committee on 6<sup>th</sup> January 2016 (HREC/15/Austin/488), and all participants gave written informed consent. The study was prospectively registered on 10<sup>th</sup> March 2016 with the Australian New Zealand Clinical Trials Registry (ACTRN12616000320459). The study was reported in accordance with the CONSORT Guidelines for reporting randomised trials.<sup>19</sup>

### *Trial design, setting, and population*

Between March 2016 and March 2017, we conducted the randomised controlled trial at the Austin Hospital, a university teaching, tertiary, metropolitan hospital at Heidelberg, Victoria. Following a pre-operative assessment at the anaesthesia pre-admissions clinic and the receipt of written informed consent, eligible patients undergoing elective major surgery were identified. Inclusion criteria included the following: adult patients (age over 18 years), surgery of greater than 2 hours' expected duration requiring at least one overnight admission, a clinical indication for continuous blood pressure monitoring via an invasive arterial line, and intermittent positive pressure ventilation via an endotracheal tube as part of standard anaesthesia care. Age criterion was modified from the previous criterion (age over 65 years) to age over 18 years in order to recruit patients who represent the intended study population. Exclusion criteria included patients undergoing cardiac surgery, procedures requiring one lung isolation, liver transplantation, intracranial surgery, GCS less than 15, known cognitive impairment, intellectual disability or a mental illness, moderate pulmonary hypertension (mean pulmonary arterial pressure greater than 40 mmHg), and American Society of Anesthesiology (ASA) status V.

### *Randomisation and blinding*

An independent statistician generated a computerised sequence of 40 allocation codes, 20 for each group. A research nurse sealed the allocation codes into sequentially numbered opaque envelopes. The study participants, surgeons, and all peri-operative staff were blinded to treatment allocation. However, it was not possible to blind the attending anaesthetist who was responsible for the delivery of the intervention. Immediately after induction of anaesthesia,

1  
2  
3 patients were randomised to either targeted mild hypercapnia (PaCO<sub>2</sub> 45-55 mmHg) or  
4 targeted normocapnia (PaCO<sub>2</sub> 35-40 mmHg). The end-tidal carbon dioxide (EtCO<sub>2</sub>) was  
5 titrated accordingly in order to achieve the desired intervention, but the anaesthetist did not  
6 have an rSO<sub>2</sub> goal to titrate to. Data collection for all the trial outcomes was collected by an  
7 independent researcher blinded to treatment allocation. The sequence was decoded after the  
8 data were analysed. The anaesthetist delivering the intervention did not participate in the  
9 assessment of postoperative delirium.  
10  
11  
12  
13  
14  
15  
16  
17

### 18 *Outcomes and data collection*

19 The primary endpoint was the absolute difference between the TMH and TN groups in  
20 percentage change in rSO<sub>2</sub> from baseline to completion of surgery. Secondary endpoints  
21 evaluated the effects of mild hypercapnia on the incidence of postoperative delirium, intra-  
22 operative pH, bicarbonate, base excess, serum potassium, and length of hospital stay  
23 (LOS). LOS was prespecified as secondary outcome in the original study protocol. However,  
24 it was not prespecified as a secondary outcome in the prospective Australian New Zealand  
25 Clinical Trials Registry (ANZCTR). Therefore, the trials registry was retrospectively updated  
26 to include LOS as a secondary outcome to align with the study protocol.  
27  
28  
29  
30  
31  
32  
33  
34

### 35 *Measurement of rSO<sub>2</sub>*

36 Regional cerebral oxygen saturation was collected using the Masimo O<sub>3</sub><sup>TM</sup> regional oximetry  
37 component of the Root<sup>TM</sup> Patient Monitor platform (O<sub>3</sub><sup>TM</sup> Masimo, Irvine, CA). This regional  
38 oximetry device uses NIRS and reflectance oximetry to monitor rSO<sub>2</sub> in the brain, displaying  
39 both absolute and trend rSO<sub>2</sub> values. The absolute oximetry value is defined as the rSO<sub>2</sub> value  
40 measured by the oximetry probe calibrated by a fixed ratio of arterial to venous blood. In our  
41 study, only the absolute oximetry data were extracted and analysed. The accuracy of the  
42 Masimo O<sub>3</sub><sup>TM</sup> regional oximetry was investigated by *Redford et al.* previously, and the  
43 measurement error was reported to be approximately 4% when checked against reference  
44 blood samples taken from the radial artery and internal jugular bulb vein.<sup>20</sup> Regional cerebral  
45 oxygen saturation was measured in the two hemispheres separately, with a NIRS sensor  
46 attached to each side of patient's forehead. The baseline rSO<sub>2</sub> was recorded before  
47 commencing any premedication and before induction of anaesthesia. Subsequent rSO<sub>2</sub>  
48 measurements were recorded every two seconds until the last surgical suture was sited. Data  
49 were exported as comma separated values files after surgery and processed using manually  
50  
51  
52  
53  
54  
55  
56  
57  
58  
59  
60

1  
2  
3 written R scripts on RStudio v.1.0.136 (**Supplementary File 1**). The percentage change in  
4  $rSO_2$  ( $\% \Delta rSO_2$ ) was computed by subtracting the baseline  $rSO_2$  value from the measured  
5  $rSO_2$  value at all timepoints throughout surgery, multiplied by one hundred percent. Data  
6  
7 from the left and right forehead were analysed separately.  
8  
9

### 10 11 12 *Measurement of delirium*

13 Delirium was assessed using a validated and widely utilised Confusion Assessment Method  
14 (CAM) rating scale, adapted from Inouye *et al.*, immediately on arrival to hospital, then  
15 within 18-24 hours after surgery.<sup>21,22</sup> Diagnosis of delirium requires the presence of both  
16 acute onset with fluctuating course and inattention, together with either disorganised thinking  
17 or altered level of consciousness. A single trained interviewer, blinded to randomisation and  
18 proficient and trained in CAM, conducted all the assessments pre-operatively when each  
19 patient arrived at the hospital and at 8am on the next day after surgery in the ward (within 18-  
20 24 hours postoperatively). The baseline cognitive function was not formally assessed with  
21 collateral history from family members or carers.  
22  
23  
24  
25  
26  
27  
28  
29

### 30 31 *Measurement of PaCO<sub>2</sub> and intra-operative adherence to group allocation*

32 Immediately after tracheal intubation with a cuffed endotracheal tube, minute ventilation was  
33 adjusted to achieve an EtCO<sub>2</sub> concentration of 45-55 mmHg in the TMH group or 35-40  
34 mmHg in the TN group. Due to the presence of alveolar dead space, EtCO<sub>2</sub> can be lower than  
35 PaCO<sub>2</sub> by up to 5 mmHg. Therefore, an arterial blood gas (ABG) was obtained to check  
36 PaCO<sub>2</sub>, and ventilation was further adjusted accordingly to achieve the desired PaCO<sub>2</sub> target  
37 ranges. The PaCO<sub>2</sub>-EtCO<sub>2</sub> gradient was then maintained throughout surgery, with the  
38 assumption that the PaCO<sub>2</sub> would remain constant. Additional ABGs were sampled at the  
39 discretion of the anaesthetist if the gradient required re-evaluation, for example, requirements  
40 for an adjustment of the ventilation setting. Finally, at completion of surgery, an ABG was  
41 sampled to accurately document the PaCO<sub>2</sub> value and to assess whether PaCO<sub>2</sub> was being  
42 maintained within target values.  
43  
44  
45  
46  
47  
48  
49  
50  
51

### 52 53 *Arterial blood gas analysis*

54 All arterial blood gas variables were collected by ABL80 FLEX Blood Gas Analyzer  
55 (Radiometer, Copenhagen, Denmark) with a fully automated micromode, eliminating the risk  
56 of user-induced bias or loss of accuracy with very small samples, and an interference-  
57 protected lactate analyser. ABG variables include partial pressure of oxygen (PaO<sub>2</sub>), PaCO<sub>2</sub>,  
58  
59  
60

pH, bicarbonate concentration, base excess, lactate, haemoglobin concentration (Hb), and electrolytes such as sodium and potassium ion concentrations. The machine calculates the bicarbonate concentration using the Henderson-Hasselbalch equation and the standard base excess (SBE) using the Van Slyke equation by determining changes in bicarbonate, protein anion, and phosphate concentrations, with the reference points pH = 7.40, PaCO<sub>2</sub> = 40mmHg, and temperature = 37°C. Two or more ABG samples were measured intra-operatively, as described previously. The mean values of pH, bicarbonate concentration, base excess, and serum potassium concentration from the first and the last ABG samples were considered as some of the secondary outcomes for the study. Intra-operative pH, bicarbonate, and base excess are important variables that inform the acid–base status of a patient; in particular, bicarbonate and base excess are useful when determining the extent of metabolic contributions or compensation. Potassium concentration is a key physiological parameter that affects cardiac action potential conduction, and its relevance in the study is paramount, as hyperkalaemia from hypercapnic-induced acidosis is a potential complication of the intervention. Potential confounders to rSO<sub>2</sub> measurements, such as Hb and PaO<sub>2</sub>, were recorded. Other variables, such as lactate and sodium concentration, were collected for routine clinical care, and they were not considered as part of the outcome measures.

#### *Standardisation of care*

All patients underwent a pre-operative multidisciplinary team assessment, including a haematology-led, multimodal peri-operative haemoglobin optimisation program based on the National Blood Authority of Australia's patient blood management initiatives to optimise pre-operative red cell mass, minimise peri-operative blood loss, and tolerate postoperative anaemia.<sup>23</sup> All participants were fasted two hours for clear fluids and six hours for solids, according to standard hospital fasting protocols. All participants received a general anaesthetic with propofol for induction, an inhalational agent for the maintenance of anaesthesia, with a 50% oxygen-to-air mixture to maintain oxygen saturations above 97%. Routine monitoring for all participants included continuous electrocardiogram (ECG), pulse oximetry, temperature, bispectral index (BIS) monitoring, and neuromuscular monitoring. Adequate depth of anaesthesia was ensured by targeting BIS readings between 40 and 60. Conduct of anaesthesia, including the use of additional invasive monitoring, intra-operative medications, intervention fluids, vasoactive medications, regional anaesthesia, and intraoperative opioids, were entirely at the discretion of the attending anaesthetist. In keeping

1  
2  
3 with hospital protocol, we transfused blood if the haemoglobin concentration was less than 75  
4 g dL<sup>-1</sup> or less than 80 g dL<sup>-1</sup> in the presence of ongoing bleeding.  
5  
6  
7

### 8 9 *Sample size calculations*

10  
11 Based on our institution's pilot data and reported figures, normal rSO<sub>2</sub> values for awake  
12 patients could range from 60% to 80%,<sup>24</sup> which we assumed to be the case at the baseline  
13 (beginning of surgery). We assumed no change in rSO<sub>2</sub> in the control group and considered  
14 an absolute difference between the groups in percentage change in rSO<sub>2</sub> value from the  
15 baseline to the completion of surgery of 15% to be clinically important. Thus, the absolute  
16 changes in rSO<sub>2</sub> from the baseline to the end of surgery were hypothesised to be 0% in the  
17 control group and 12% (15% percentage change from the baseline of 80% rSO<sub>2</sub>) in the  
18 intervention group. Assuming a two-tailed threshold for statistical significance of 0.05 and  
19 standard deviation of the absolute change of 10%, the total sample size of 40 patients (equally  
20 distributed between two groups) will yield the 0.9 power to observe a large treatment effect  
21 (Cohen's  $d=1.1$  or higher).  
22  
23  
24  
25  
26  
27  
28  
29  
30  
31

### 32 33 *Statistical analysis*

34  
35 The study was reported in accordance with the Statistical Analyses and Methods in the  
36 Published Literature (SAMPL) Guidelines.<sup>25</sup> The statistical analysis was performed using  
37 commercial statistical software STATA/IC v.13 with a  $P$  value of 0.05 to indicate statistical  
38 significance. Figures and tables were created by manually written R scripts on RStudio v.  
39 1.0.136 (**Supplementary File 2**). Fisher's exact test was used in the analysis of all  
40 categorical variables. For continuous variables, normality was determined by the Shapiro–  
41 Wilk test and further confirmed by a manual inspection of the skewness and kurtosis of the  
42 data. Parametric continuous data were compared by the Student's  $t$ -test, and non-parametric  
43 continuous data were compared by the Mann-Whitney U test. For normally distributed data,  
44 the results were presented as the mean (standard deviation); and for non-parametric data, the  
45 results were presented as the median [inter-quartile range] unless otherwise stated. A more  
46 detailed longitudinal analysis of time-by-treatment interaction was also conducted using a  
47 random effect generalised least squares regression model (due to the repeated measures  
48 nature of the data) with percentage change in rSO<sub>2</sub> at a given time point throughout the  
49 surgery as the output, the treatment group, the time (minutes from start of surgery), as well as  
50 the time-by-treatment interaction term as inputs. The duration of surgery varied between  
51  
52  
53  
54  
55  
56  
57  
58  
59  
60

1  
2  
3 different patients, and therefore, in order to compare  $\% \Delta rSO_2$  at different time points across  
4 all the patients, the time was measured using the “minutes from the start of surgery” metric.  
5 For robustness analyses, similar models adjusted for age, baseline oximetry values, and pre-  
6 operative Hb levels were implemented, as well as models where time was measured not in  
7 minutes, but as a percentage of total surgery duration.  
8  
9  
10  
11  
12

### 13 *Patient and public involvement*

14  
15 Patients were involved in the study from the initial pre-admission consultation appointment  
16 where the rationale of the study, potential applications of the study outcomes, data privacy  
17 and management, and potential harmful effects were explained in detail. Patients were not  
18 directly involved in the development of the research question and outcome measures, and  
19 they were not involved in the design and conduct of the study. Potential burden of the  
20 intervention was not rated by the patients themselves; rather, potential harmful effects were  
21 monitored by the attending anaesthetist as part of routine clinical care. Study results and  
22 outcomes, once finalised, will be mailed out to study participants.  
23  
24  
25  
26  
27  
28  
29  
30  
31  
32  
33  
34  
35  
36  
37  
38  
39  
40  
41  
42  
43  
44  
45  
46  
47  
48  
49  
50  
51  
52  
53  
54  
55  
56  
57  
58  
59  
60

## **Results**

Seventy-seven participants were screened for eligibility. Thirty-seven patients were excluded because they did not meet the inclusion criteria ( $n=6$ ), they declined to participate ( $n=30$ ), or the anaesthetist objected to the intervention ( $n=1$ ). For logistical reasons, recruitment could only be performed when the interviewer conducting the CAM testing was available. The CONSORT diagram is presented in **Figure 1**. There were no violations or breaches of the study protocol; however, two participants in the hypercapnic group had a failure of bilateral probe attachment and lead connection problem that were unable to be rectified. These patients were subsequently excluded from the analyses of oxygenation, as no  $rSO_2$  data were captured. They were included in the analysis of all other variables and endpoints. In the hypercapnic group, three participants had unilateral discontinuous oximetry readings due to intermittent signal dropout. In the normocapnic group, signal dropout occurred in two patients on the left side. The corresponding data were excluded.

The baseline participant and surgical characteristics are summarised in **Table 1**.

**Table 1.** Baseline patient characteristics and surgical characteristics

|                                       | <b>TMH group<br/>(<math>n=20</math>)</b> | <b>TN group<br/>(<math>n=20</math>)</b> |
|---------------------------------------|------------------------------------------|-----------------------------------------|
| <b><u>Patient characteristics</u></b> |                                          |                                         |
| Gender (Male : Female)                | 11:9                                     | 12:8                                    |
| Age (years)                           | 63.7 [32 to 81]                          | 65.4 [31 to 81]                         |
| Age > 65 (years)                      | 9 (45.0)                                 | 11 (55.0)                               |
| Weight (kg)                           | 83.7 [56.8 to 110.6]                     | 81.2 [67.9 to 94.5]                     |
| BMI ( $kg\ m^{-2}$ )                  | 33.6 [20.7 to 46.5]                      | 32.8 [26.8 to 38.8]                     |
| ASA Status                            |                                          |                                         |
| 1                                     | 5 (25.0)                                 | 2 (10.0)                                |
| 2                                     | 6 (30.0)                                 | 4 (20.0)                                |
| 3                                     | 7 (35.0)                                 | 10 (50.0)                               |
| 4                                     | 2 (10.0)                                 | 4 (20.0)                                |
| Diabetes                              | 4 (22.2)                                 | 5 (25.0)                                |



|                                        |                        |                        |                    |
|----------------------------------------|------------------------|------------------------|--------------------|
| COPD                                   | 5 (27.8)               | 0 (0.0)                |                    |
| Malignancy                             | 11 (61.1)              | 7 (35.0)               |                    |
| Other co-morbidities                   | 11 (61.1)              | 16 (80.0)              |                    |
| <b><u>Surgical Characteristics</u></b> |                        |                        |                    |
| Duration of surgery (mins)             | 219.0 [123.8 to 303.8] | 144.0 [107.8 to 218.2] | ( <i>P</i> =0.121) |
| Left baseline oximetry (%)             | 68.7 [63.9 to 72.2]    | 63.4 [57.3 to 69.6]    | ( <i>P</i> =0.233) |
| Right baseline oximetry (%)            | 67.9 [64.6 to 70.3]    | 64.0 [59.4 to 69.0]    | ( <i>P</i> =0.286) |
| Pulse oximetry (%)                     | 98.5 [98.1 to 99.0]    | 98.5 [97.9 to 99.0]    | ( <i>P</i> =0.834) |
| LOS (days)                             | 5 [2.0 to 12.0]        | 5 [1.8 to 11.5]        | ( <i>P</i> =0.988) |
| Type of surgery                        |                        |                        |                    |
| colorectal                             | 2 (10.0)               | 1 (5.0)                |                    |
| endocrine                              | 2 (10.0)               | 2 (10.0)               |                    |
| ear nose & throat                      | 0 (0.0)                | 1 (5.0)                |                    |
| hepatobiliary                          | 6 (30.0)               | 9 (45.0)               |                    |
| spinal surgery                         | 1 (5.0)                | 1 (5.0)                |                    |
| orthopedic                             | 2 (10.0)               | 1 (5.0)                |                    |
| thoracic                               | 5 (25.0)               | 1 (5.0)                |                    |
| urology                                | 2 (10.0)               | 3 (15.0)               |                    |
| vascular                               | 0 (0.0)                | 1 (5.0)                |                    |

Data reported as number (%) or median [inter-quartile range], except for age, which is reported as mean [range]

ASA: American Society of Anesthesiologists

BMI: body mass index

COPD: chronic obstructive pulmonary disease

LOS: length of hospital stay

Other co-morbidities include any of the following, ischaemic heart disease, atrial fibrillation, hypertension, history of cerebral vascular disease, and chronic kidney impairment

Spinal surgery includes non-intracranial procedures

Thoracic surgery includes procedures not requiring one lung ventilation, e.g. mediastinoscopy with nodal dissection

TMH: targeted mild hypercapnia, TN: targeted normocapnia

Both groups were similar in terms of gender, age, weight, body mass index, ASA physical status, and type of surgery performed. In terms of co-morbidities, both groups were similar, except for the presence of chronic obstructive pulmonary disease. There was 100%

1  
2  
3 compliance to the designated PaCO<sub>2</sub> intra-operative targets. The median [inter-quartile range,  
4 IQR] PaCO<sub>2</sub> in the TMH group and TN groups were 51.5 mmHg [46.9 to 60.9] and 34.8  
5 mmHg [32.8 to 38.1], respectively ( $P<0.001$ ). With regards to surgical characteristics, the  
6 duration of surgery was longer in the TMN group, with a median [IQR] duration of 219  
7 minutes [124 to 304] versus 144 minutes [108 to 218] in the TN group, although this was not  
8 significant at the 5% level ( $P=0.121$ ). PaO<sub>2</sub> was similar between the two groups: 156.8  
9 mmHg [146.3 to 217.2] in the TMH group and 142.5 mmHg [122.5 to 199.1] in the TN group  
10 ( $P=0.380$ ). Oxygen saturation was similar: 98.5% in the TMH group [98.1 to 99.0] and  
11 98.5% in the TN group [97.9 to 99.0] ( $P=0.834$ ). Both groups also had similar mean arterial  
12 pressure (MAP) intra-operatively ( $P=0.307$ ), similar total Hb (130.50 vs. 122.25 g L<sup>-1</sup>;  
13  $P=0.132$ ), and similar total dose of intra-operative opioid received, 21.67 mg in the TMH  
14 group [13.75 to 32.50] and 16.67 mg in the TN group [10.00 to 22.50] ( $P=0.22$ ). In terms of  
15 intra-operative positioning of patients, one patient from each group was positioned in steep  
16 reverse Trendelenburg with minimal tilt. All other patients were positioned in the supine  
17 position with a neutral head position.  
18  
19  
20  
21  
22  
23  
24  
25  
26  
27  
28  
29  
30

### 31 *Primary endpoint*

32 On the left hemisphere, the median [IQR] baseline oximetry was 68.7% [63.9 to 72.2] in the  
33 TMH group vs. 63.4% [57.3 to 69.6] in the TN group ( $P=0.233$ ). On the right hemisphere,  
34 the median [IQR] baseline oximetry was 67.9% [64.6 to 70.3] in the TMH group vs. 64.0%  
35 [59.4 to 69.9] in the TN group ( $P=0.286$ ). On both sides, the % $\Delta$ rSO<sub>2</sub> was greater in the  
36 TMH group than the TN group throughout the duration of surgery (**Figure 2**). The mean  
37 (standard deviation, SD) percentage changes in rSO<sub>2</sub> from the baseline to the conclusion of  
38 the surgery in the TMH group were +8.56% (18.90%) on the left and +13.86% (18.17%) on  
39 the right; and in TN the group, they were -6.18% (17.24%) on the left and -5.48% (18.94%)  
40 on the right. The resulting treatment effects were 19% (95% CI [9.2 to 28.8];  $P<0.001$ ) on the  
41 left and 19% (95% CI [10.9 to 27.0];  $P<0.001$ ) on the right (**Table 2**).  
42  
43  
44  
45  
46  
47  
48  
49  
50  
51  
52  
53  
54  
55  
56  
57  
58  
59  
60

**Table 2.** Percentage change in cerebral oximetry (% $\Delta$ rSO<sub>2</sub>) from baseline

| Time from start of surgery (mins) |     | 15                 | 30                 | 45                  | 60                  | 75                  | 90                  | 105                 | 120                 |
|-----------------------------------|-----|--------------------|--------------------|---------------------|---------------------|---------------------|---------------------|---------------------|---------------------|
| Left                              | TMH | 0.8 (12.9)<br>{15} | 5.8 (12.3)<br>{15} | 9.0 (15.9)<br>{15}  | 7.0 (14.6)<br>{15}  | 8.5 (15.4)<br>{14}  | 7.3 (14.7)<br>{13}  | 7.7 (17.4)<br>{13}  | 8.1 (14.8)<br>{13}  |
|                                   | TN  | 4.7 (10.5)<br>{18} | 3.2 (15.4)<br>{18} | -1.9 (14.1)<br>{17} | -5.6 (12.7)<br>{17} | -5.3 (15.2)<br>{17} | -5.5 (15.8)<br>{17} | -6.0 (15.2)<br>{17} | -3.6 (15.8)<br>{14} |
| Right                             | TMH | 6.0 (12.9)<br>{17} | 9.8 (13.2)<br>{17} | 10.4 (18.1)<br>{17} | 11.1 (17.4)<br>{17} | 13.0 (16.4)<br>{16} | 15.6 (17.3)<br>{15} | 14.4 (17.5)<br>{14} | 14.1 (13.6)<br>{14} |
|                                   | TN  | 5.2 (12.6)<br>{20} | 3.9 (11.7)<br>{20} | -3.3 (13.2)<br>{19} | -5.2 (12.1)<br>{19} | -5.4 (12.3)<br>{19} | -4.7 (14.1)<br>{19} | -3.8 (13.7)<br>{18} | -1.3 (13.9)<br>{15} |

| Time from start of surgery (mins) |     | 120                 | 240                 | 360                 | 480                | 600                | 720        | Mean % difference from start to completion of surgery | 95% confidence interval | P value (treatment) |
|-----------------------------------|-----|---------------------|---------------------|---------------------|--------------------|--------------------|------------|-------------------------------------------------------|-------------------------|---------------------|
| Left                              | TMH | 8.1 (14.8)<br>{13}  | 6.8 (20.6)<br>{7}   | 6.4 (32.5)<br>{4}   | -8.6 (21.1)<br>{3} | -6.1 (14.1)<br>{3} | 6.9<br>{1} | 19.0                                                  | 9.2 -28.8               | <0.001              |
|                                   | TN  | -3.6 (15.8)<br>{14} | -10.4 (39.5)<br>{5} | -43.4 (34.9)<br>{2} | -27.8<br>{1}       |                    |            |                                                       |                         |                     |
| Right                             | TMH | 14.1 (13.6)<br>{14} | 18.4 (23.5)<br>{8}  | 16.8 (36.8)<br>{4}  | 1.5 (14.9)<br>{3}  | 3.0 (8.7)<br>{3}   | 2.0<br>{1} | 19.0                                                  | 10.9- 27.0              | <0.001              |
|                                   | TN  | -1.3 (13.9)<br>{15} | -5.3 (32.6)<br>{5}  | -35.4 (26.9)<br>{2} | -37.8<br>{1}       |                    |            |                                                       |                         |                     |

Data reported as mean (standard deviation) {sample size}, and presented every 15 minutes for the first 2 hours and every 2 hours afterwards

TMH: targeted mild hypercapnia, TN: targeted normocapnia

On the longitudinal time-by-treatment interaction analysis, the difference in  $\% \Delta rSO_2$  on both left and right hemispheres between the two groups diverged with time, with the intervention group exhibiting a smaller percentage decrease over time compared to the control group (time-by-treatment interaction  $P < 0.001$  for both left and right hemispheres). We obtained very similar results on the robustness analyses when the above model was adjusted for age, baseline oximetry, and pre-operative Hb levels, as well as when the percentage of total duration of surgery, instead of minutes from the start of surgery, were included.

### Secondary outcomes

Postoperative delirium was statistically significantly less common in the TMH group. Postoperative delirium was present in 0 out of 20 (0%) participants in the TMH group and 6 out of 20 (30%) participants in the TN group (risk difference 0.3, 95% CI [0.1 to 0.5], Fisher's exact  $P = 0.02$ ) (Table 3).

**Table 3.** Postoperative delirium and opioid doses

|                               | TMH group<br>(n=20)    | TN group<br>(n=20)     |                |
|-------------------------------|------------------------|------------------------|----------------|
| <b>Pre-medication</b>         |                        |                        |                |
| Number of patients            | 0 (0.0)                | 2 (10.0)               |                |
| Mean midazolam dose (mg)      | 0                      | 1.75                   |                |
| <b>Intra-operative opioid</b> |                        |                        |                |
| Total dose (mg)               | 21.67 [13.75 to 32.50] | 16.67 [10.00 to 22.50] | ( $P = 0.22$ ) |
| Received i.v. morphine        | 2 (10.0)               | 1 (5.0)                |                |
| Received i.v. fentanyl        | 10 (50.0)              | 14 (70.0)              |                |
| Received i.v. oxycodone       | 9 (45.0)               | 7 (35.0)               |                |
| Received i.v. tramadol        | 4 (20.0)               | 0 (0.0)                |                |
| Received i.v. clonidine       | 0 (0.0)                | 2 (10.0)               |                |
| <b>Intrathecal morphine</b>   |                        |                        |                |
| Number of patients            | 5                      | 2                      |                |
| Mean dose (mcg)               | 220                    | 350                    |                |

|                                           |                  |                  |                   |
|-------------------------------------------|------------------|------------------|-------------------|
| <b>Epidural analgesia</b>                 |                  |                  |                   |
| Number of patients                        | 0                | 0                |                   |
| <b>Blood glucose level</b>                |                  |                  |                   |
| Glucose (mmol L <sup>-1</sup> )           | 7.1 [7.0 to 7.1] | 6.6 [6.4 to 6.7] | ( <i>P</i> =0.33) |
| <b>Pre-operative CAM</b>                  | 0 [0.0 to 0.0]   | 0 [0.0 to 0.0]   |                   |
| <b>Postoperative CAM</b>                  | 0 [0.0 to 0.0]   | 1.5 [0.0 to 3.0] |                   |
| <b>Presence of postoperative delirium</b> | 0 (0.0)          | 6 (30.0)         | ( <i>P</i> =0.02) |

Data reported as median [inter-quartile range] or number (%)

CAM: Confusion Assessment Method

Note some patients received 2 or more different intra-operative opioids

Total dose of intra-operative opioid normalised to i.v. morphine equivalent

TMH: targeted mild hypercapnia, TN: targeted normocapnia

In terms of acid–base variables, median intra-operative pH was statistically significantly lower (7.31 vs. 7.46; *P*<0.001), and intra-operative bicarbonate was statistically significantly higher (25.00 vs. 24.00 mEq L<sup>-1</sup>; *P*=0.020) in the TMH. No statistically significant differences in base excess (-1.00 vs. 1.00 mmol L<sup>-1</sup>; *P*=0.069) and potassium (3.98 vs. 4.03 mEq L<sup>-1</sup>; *P*=0.759) were observed intra-operatively. Length of hospital stay was also similar between the two groups (5 vs. 5 days; *P*=0.988). These results are summarised in **Table 4**.

**Table 4.** Arterial blood gas values and the corresponding EtCO<sub>2</sub>

|                                     | <b>TMH group<br/>(<i>n</i>=20)</b> | <b>TN group<br/>(<i>n</i>=20)</b> | <i>P</i> -value |
|-------------------------------------|------------------------------------|-----------------------------------|-----------------|
| pH                                  | 7.31 [7.27 to 7.33]                | 7.46 [7.43 to 7.47]               | <0.001          |
| PaO <sub>2</sub> (mmHg)             | 156.8 [146.3 to 217.2]             | 142.5 [122.5 to 199.1]            | 0.380           |
| PaCO <sub>2</sub> (mmHg)            | 51.50 [46.88 to 60.88]             | 34.75 [32.75 to 38.12]            | <0.001          |
| EtCO <sub>2</sub> (mmHg)            | 46.40 [39.80 to 50.20]             | 30.40 [28.50 to 32.00]            | <0.001          |
| Bicarbonate (mEq L <sup>-1</sup> )  | 25.00 [24.00 to 27.75]             | 24.00 [22.00 to 24.62]            | 0.020           |
| Base excess (mmol L <sup>-1</sup> ) | -1.00 [-2.50 to 0.25]              | 1.00 [-0.88 to 2.00]              | 0.069           |
| Potassium (mEq L <sup>-1</sup> )    | 3.98 [3.73 to 4.38]                | 4.03 [3.58 to 4.31]               | 0.759           |
| Total Hb (g L <sup>-1</sup> )       | 130.50 [118.12 to 140.62]          | 122.25 [106.88 to 131.25]         | 0.132           |

1  
2  
3  
4 Data reported as median [inter-quartile range] or number (%)

5 EtCO<sub>2</sub>: end tidal carbon dioxide

6  
7 Hb: haemoglobin concentration

8 PaCO<sub>2</sub>: partial pressure of carbon dioxide in arterial blood

9  
10 PaO<sub>2</sub>: partial pressure of oxygen in arterial blood

11  
12 TMH: targeted mild hypercapnia, TN: targeted normocapnia  
13  
14  
15  
16  
17  
18  
19  
20  
21  
22  
23  
24  
25  
26  
27  
28  
29  
30  
31  
32  
33  
34  
35  
36  
37  
38  
39  
40  
41  
42  
43  
44  
45  
46  
47  
48  
49  
50  
51  
52  
53  
54  
55  
56  
57  
58  
59  
60

## **Discussion**

We conducted a prospective, single centre, single blinded, randomised controlled trial evaluating the effects of TMH and TN on rSO<sub>2</sub> in patients undergoing major surgery. TMH led to a stable increase in both left and right NIRS-derived rSO<sub>2</sub> from the baseline values, while TN led to a decrease in rSO<sub>2</sub>. This effect was sustained throughout surgery and became more pronounced with the passage of time. Furthermore, TMH was associated with a lower incidence of postoperative delirium within 24 hours after surgery.

Whilst the relationship between elevated PaCO<sub>2</sub> and cerebral blood flow (CBF) is well described,<sup>26-29</sup> the associations between hypercapnia and higher rSO<sub>2</sub> are poorly understood. Numerous factors, for instance, cardiac output, haemoglobin affinity for oxygen, cerebral autoregulation, and the ratio of cerebral arterial to venous blood volume, affect rSO<sub>2</sub> in the setting of hypercapnia, but changes in PaCO<sub>2</sub> and CBF, in turn, have a direct influence on these factors.<sup>30,31</sup> To complicate the subject further, the duration of effect of hypercapnia on rSO<sub>2</sub> is unknown. In our study, confounding variables, such as MAP, PaO<sub>2</sub>, Hb, and intra-operative position, were similar between the TMH and TN groups. However, pH, which directly affects the haemoglobin affinity for oxygen via the Bohr Effect, was significantly different. Since we cannot measure the ratio of arterial to venous blood volume, it would be impetuous to comment on the mechanism behind the observed higher rSO<sub>2</sub> values in TMH. Clinically, similar observations have been reported previously. Eastwood *et al.* compared rSO<sub>2</sub> values at the end of alternating hypercapnic and normocapnic periods in post-cardiac arrest patients in a double cross-over study, and discovered that mild hypercapnia resulted in higher rSO<sub>2</sub>.<sup>32</sup> When Akca *et al.* delivered mild hypercapnia intra-operatively to investigate tissue oxygenation and its relationship with wound infection risk after surgery, cerebral oxygen saturation was found to be higher in the mild hypercapnic group.<sup>15</sup> Similarly, rSO<sub>2</sub> remained higher in hypercapnic patients throughout shoulder surgery, and less cerebral desaturation events were observed by Murphy *et al.*<sup>33</sup> Our study is one of the few randomised controlled trials that investigated rSO<sub>2</sub> change over time. We found that the sustained difference in rSO<sub>2</sub> over time was a combined effect of a stable increase in rSO<sub>2</sub> from the baseline in the TMH group and a stable decrease in

1  
2  
3  
4 rSO<sub>2</sub> from the baseline in the TN group. In the literature, the association between  
5 normocapnia and reduced CBF and lower levels of rSO<sub>2</sub> were reported briefly.<sup>34</sup>  
6 However, the exact mechanism and associations between normocapnia and variations in  
7 rSO<sub>2</sub> values are not entirely clear. Whilst theoretical absolute and relative saturation  
8 thresholds requiring prompt interventions have been proposed,<sup>14</sup> these thresholds have  
9 not been validated and there is a lack of consensus on the indication and timing of  
10 interventions. In our study, the reduction in rSO<sub>2</sub> from the baseline was small in the  
11 majority of patients in the TN group, and the attending anaesthetists had no rSO<sub>2</sub> target  
12 to titrate to. As a result, no interventions were performed intra-operatively in response  
13 to changes in rSO<sub>2</sub>. Comparing the TMH and TN groups, the sustained difference in  
14 percentage change in rSO<sub>2</sub> over time is a novel finding.  
15  
16  
17  
18  
19  
20  
21  
22  
23  
24  
25

26 Interestingly, the incidence of postoperative delirium after surgery was lower in the  
27 TMH group, while LOS remained similar between the groups. Patients who suffered  
28 from postoperative delirium were all in the TN group, but they were also older (median  
29 [IQR] age = 72 [59.5 to 77]) and had higher ASA scores (ASA scores of 3, 2, 1, 4 and  
30 4). Their baseline medical co-morbidities and duration of surgery (median [IQR]  
31 duration of surgery = 171 minutes [83.5 to 254.5]) were similar to other study  
32 participants. There has been conflicting evidence in the literature regarding the  
33 relationship between rSO<sub>2</sub> and LOS on postoperative cognitive performance. Cognitive  
34 outcomes were similar in groups with or without NIRS-based rSO<sub>2</sub> optimisation in a  
35 recent randomised controlled trial.<sup>14,35</sup> On the other hand, Murkin *et al.* found that  
36 monitoring and reacting to cerebral desaturation during coronary artery bypass surgery  
37 was associated with clinical benefits.<sup>13</sup> Patients with shorter LOS (<10 days) had a  
38 higher mean rSO<sub>2</sub>. Intra-operative NIRS rSO<sub>2</sub> monitoring led to a significant reduction  
39 in postoperative cognitive disturbance, confirmed by Trafidlo *et al.*<sup>36</sup> Casati *et al.* also  
40 reported that higher rSO<sub>2</sub> led to shorter LOS and improved Mini-Mental State  
41 Examination scores in elderly patients undergoing major abdominal surgery,<sup>37</sup> and  
42 Schoen *et al.* found that low pre-operative rSO<sub>2</sub> was associated with a higher incidence  
43 of postoperative delirium. Among patients who started at a normal rSO<sub>2</sub> level, those  
44 who developed delirium had a larger intra-operative drop in rSO<sub>2</sub>.<sup>38</sup> Our findings were  
45 consistent with those of Schoen *et al.*; however, they need to be interpreted with  
46  
47  
48  
49  
50  
51  
52  
53  
54  
55  
56  
57  
58  
59  
60



1  
2  
3  
4 caution, as the ASA scores and age were slightly higher in the TN group, and our study  
5 was not designed to quantitatively investigate postoperative cognitive performance in  
6 hypercapnia.  
7  
8

9  
10  
11 Implications of our findings demonstrate that TMH can be delivered reliably during  
12 major surgery, and its effects on rSO<sub>2</sub> can be monitored with NIRS in most patients. Its  
13 delivery is reliably associated with increased levels of rSO<sub>2</sub>, and the relatively higher  
14 rSO<sub>2</sub> is sustained over the duration of surgery, an observation that has not been reported  
15 in the literature. Furthermore, TMH may reduce the incidence of the development of  
16 immediate postoperative delirium. A clinical concern of mild hypercapnia is  
17 hypercapnic-induced acidosis and the subsequent development of hyperkalaemia.  
18 Whilst a linear correlation between arterial carbon dioxide and plasma pH is well  
19 reported,<sup>39</sup> the relationship between acute hypercapnia, respiratory acidosis, and plasma  
20 potassium is also poorly understood.<sup>40</sup> In the present study, we found no association  
21 between hypercapnia and serum potassium concentration, a finding also supported by  
22 others.<sup>41</sup> We did not observe any other deleterious or adverse effects from hypercapnic-  
23 induced acidosis such as cardiac arrhythmias in our study. Interestingly, whilst our  
24 study was not designed to measure differences in analgesia and partial pressure of  
25 oxygen in arterial blood, we observed a 10% higher median PaO<sub>2</sub> level in the TMH  
26 group and found that the median intra-operative analgesia requirements were also  
27 approximately 30% higher. Both arterial oxygen levels and pain have been reported to  
28 influence tissue oxygenation,<sup>42</sup> which was not directly measured in our study. The effect  
29 of pain on cerebral oxygenation is unclear and has not been borne out in clinical  
30 studies;<sup>43</sup> further studies exploring this association are needed. Finally, we have shown  
31 that NIRS-based cerebral oximetry is a non-invasive and practical method of measuring  
32 rSO<sub>2</sub>, easily incorporated into the existing collection of routine monitoring variables,  
33 findings that are in agreement with other research groups.<sup>20,44-46</sup>  
34  
35  
36  
37  
38  
39  
40  
41  
42  
43  
44  
45  
46  
47  
48  
49  
50  
51  
52  
53

54 Our study has multiple strengths. Our findings have high internal validity because the  
55 study was a randomised controlled trial with concealed allocation and blinded  
56 assessment, minimising selection and ascertainment bias. The rSO<sub>2</sub> data were exported  
57  
58  
59  
60

1  
2  
3  
4 directly to RStudio, and ABG data were analysed by the ABL Blood Gas Analyzer,  
5 rendering sampling error from data entry unlikely, thereby increasing the robustness of  
6 our findings. Sampling of continuous oximetry data resulted in a stream of oximetry  
7 data throughout the monitoring periods, maximising the details of our assessment.  
8 Although the duration of surgery was different for individual patients, oximetry data  
9 were not normalised to another time scale, enabling a fair comparison of data across the  
10 study groups. NIRS-derived  $rSO_2$  has been criticised for potential extra-cranial  
11 contamination that would confound true  $rSO_2$ .<sup>47</sup> However, there is sufficient evidence to  
12 support the accuracy of NIRS-derived  $rSO_2$ ,<sup>20,44</sup> particularly in the case of hypercapnia,  
13 where extra-cranial signal interference has been shown to be insignificant, justifying its  
14 reliability.<sup>48</sup> Moreover, as the technology was the same in both groups, any inaccuracy  
15 should not have been a source of bias.  
16  
17  
18  
19  
20  
21  
22  
23  
24  
25  
26  
27

28 Our study also has a number of limitations. The attending anaesthetists were not blinded  
29 due to the nature of the intervention. Nevertheless, bias was mitigated by the fact that  
30 measurements were taken directly from the cerebral oximetry machine, and the  
31 assessment of delirium was conducted by an independent researcher blinded to the  
32 intervention. The external validity of our findings was restricted by the small sample  
33 size from one single centre. The sample size calculation was based on the assumption  
34 that there were no changes in  $rSO_2$  values from the baseline in the TN group. The  
35 observed negative change can therefore impact the calculation. The strong nature of  
36 interaction between treatment and time for  $rSO_2$  outcome should be treated with caution  
37 due to the potential minor departures of the data from the linear trend. Our findings  
38 were not applicable to patients undergoing emergency surgery, intracranial surgery, or  
39 surgery requiring one lung ventilation. The cerebral oximetry probes were only attached  
40 to the forehead, measuring  $rSO_2$  within the frontal cortex region, which carries the  
41 assumption that  $rSO_2$  was homogenous across every area of the brain. Quantification of  
42 device failure rate, despite being a critical consideration, cannot be described by our  
43 study design.  
44  
45  
46  
47  
48  
49  
50  
51  
52  
53  
54  
55  
56  
57  
58  
59  
60

We did not measure cardiac output, stroke volume, and systemic vascular resistance. Therefore, the effects on changes in intrathoracic pressure on cardiac output are unknown. Changes in intrathoracic pressure may have adversely impacted cardiac output, which may in turn have affected the EtCO<sub>2</sub>. However, given that the positive end-expiratory pressure was held constant in both groups, and the changes in lung tidal volumes were relatively small, the impact of intrathoracic pressure on cardiac output is likely to be small. Finally, our findings of a greater incidence of early postoperative delirium in the TN group need to be interpreted with caution, as confounders of postoperative delirium were not controlled, our study was not powered to investigate postoperative delirium, and mental state was only assessed by CAM, once pre-operatively and once postoperatively. Accordingly, our findings for delirium should be viewed as hypothesis generating. Nevertheless, if we were to consider that our effect size observed (i.e. risk difference of 0.3) could be due to chance and a smaller effect would be observed in a larger study, an appropriate powered randomised controlled trial for this outcome would be very feasible. If the proportion of patients with delirium in the intervention group is 10%, to achieve 90% power, the required sample size for each group would be ninety-two.

## **Conclusion**

In summary, TMH was associated with a stable increase in rSO<sub>2</sub> from the baseline, while TN was associated with a decrease in rSO<sub>2</sub> from the baseline in both hemispheres. This effect was sustained and became more pronounced with the passage of time intra-operatively.

## **Author Contributions**

Clarence Wong: This author contributed to data collection, data analysis, and manuscript write-up.

Leonid Churilov: This author contributed to data analysis and manuscript write-up.

Dean Cowie: This author contributed to patient recruitment, data collection, and preparation of manuscript.

Chong Tan: This author contributed to patient recruitment and preparation of manuscript.

Raymond Hu: This author contributed to patient recruitment and preparation of manuscript.

David Tremewen: This author contributed to patient recruitment and preparation of manuscript.

Brett Pearce: This author contributed to patient recruitment and preparation of manuscript.

Param Pillai: This author contributed to data collection and preparation of manuscript.

Dharshi Karalipillai: This author contributed to data collection and preparation of manuscript.

Rinaldo Bellomo: This author contributed to study design and preparation of manuscript.

Laurence Weinberg: This author designed the study, contributed to patient recruitment, data collection, data analysis, and preparation of manuscript.

## References

1. Brosnan RJ, Steffey EP, LeCouteur RA, Imai A, Farver TB, Kortz GD. Effects of ventilation and isoflurane end-tidal concentration on intracranial and cerebral perfusion pressures in horses. *American journal of veterinary research*. 2003;64(1):21-25.
2. Faraci FM, Breese KR, Heistad DD. Cerebral vasodilation during hypercapnia. Role of glibenclamide-sensitive potassium channels and nitric oxide. *Stroke*. 1994;25(8):1679-1683.
3. Hino JK, Short BL, Rais-Bahrami K, Seale WR. Cerebral blood flow and metabolism during and after prolonged hypercapnia in newborn lambs. *Critical care medicine*. 2000;28(10):3505-3510.
4. Nakahata MDK, Kinoshita MDPDH, Hirano MDY, Kimoto MDY, Iranami MDH, Hatano MDPDY. Mild Hypercapnia Induces Vasodilation via Adenosine Triphosphate-sensitive K<sup>+</sup>Channels in Parenchymal Microvessels of the Rat Cerebral Cortex. *Anesthesiology*. 2003;99(6):1333-1339.
5. Kaku DA, Giffard RG, Choi DW. Neuroprotective effects of glutamate antagonists and extracellular acidity. *Science (New York, NY)*. 1993;260(5113):1516-1518.
6. Vannucci RC, Brucklacher RM, Vannucci SJ. Effect of Carbon Dioxide on Cerebral Metabolism during Hypoxia-Ischemia in the Immature Rat. *Pediatr Res*. 1997;42(1):24-29.
7. Murkin JM, Arango M. Near-infrared spectroscopy as an index of brain and tissue oxygenation. *Br J Anaesth*. 2009;103 Suppl 1:i3-13.
8. Elizabeth A, Frost M. Cerebral oximetry: emerging applications for an established technology. *Anesthesiol News*. 2012;38:10.
9. Steppan J, Hogue CW, Jr. Cerebral and tissue oximetry. *Best Pract Res Clin Anaesthesiol*. 2014;28(4):429-439.
10. Ahn A, Yang J, Inigo-Santiago L, Parnia S. A feasibility study of cerebral oximetry monitoring during the post-resuscitation period in comatose patients following cardiac arrest. *Resuscitation*. 2014;85(4):522-526.

11. Storm C, Leithner C, Krannich A, et al. Regional cerebral oxygen saturation after cardiac arrest in 60 patients--a prospective outcome study. *Resuscitation*. 2014;85(8):1037-1041.
12. Ito N, Nishiyama K, Callaway CW, et al. Noninvasive regional cerebral oxygen saturation for neurological prognostication of patients with out-of-hospital cardiac arrest: a prospective multicenter observational study. *Resuscitation*. 2014;85(6):778-784.
13. Murkin JM, Adams SJ, Novick RJ, et al. Monitoring brain oxygen saturation during coronary bypass surgery: a randomized, prospective study. *Anesthesia and analgesia*. 2007;104(1):51-58.
14. Deschamps A, Hall R, Grocott H, et al. Cerebral Oximetry Monitoring to Maintain Normal Cerebral Oxygen Saturation during High-risk Cardiac Surgery: A Randomized Controlled Feasibility Trial. *Anesthesiology*. 2016;124(4):826-836.
15. Akca O, Liem E, Suleman MI, Doufas AG, Galandiuk S, Sessler DI. Effect of intra-operative end-tidal carbon dioxide partial pressure on tissue oxygenation. *Anaesthesia*. 2003;58(6):536-542.
16. Robinson TN, Eiseman B. Postoperative delirium in the elderly: diagnosis and management. *Clinical Interventions in Aging*. 2008;3(2):351-355.
17. Liu LL, Leung JM. Predicting adverse postoperative outcomes in patients aged 80 years or older. *Journal of the American Geriatrics Society*. 2000;48(4):405-412.
18. Inouye SK. Delirium in older persons. *The New England journal of medicine*. 2006;354(11):1157-1165.
19. Schulz KF, Altman DG, Moher D. CONSORT 2010 Statement: updated guidelines for reporting parallel group randomised trials. *BMJ*. 2010;340.
20. Redford D, Paidy S, Kashif F. Absolute and trend accuracy of a new regional oximeter in healthy volunteers during controlled hypoxia. *Anesth Analg*. 2014;119(6):1315-1319.
21. Inouye SK, van Dyck CH, Alessi CA, Balkin S, Siegal AP, Horwitz RI. Clarifying confusion: the confusion assessment method. A new method for detection of delirium. *Annals of internal medicine*. 1990;113(12):941-948.

22. Sharon K, Inouye MD, MPH. Confusion Assessment Method: Training Manual and Coding Guide, Copyright 2003.
23. National Blood Authority. Blood Management Guidelines: Module 2 Perioperative. 2012; <http://www.nba.gov.au/guidelines/module2/po-mod2.pdf2>.
24. Vretzakis G, Georgopoulou S, Stamoulis K, et al. Cerebral oximetry in cardiac anesthesia. *Journal of thoracic disease*. 2014;6 Suppl 1:S60-69.
25. Lang TA, Altman DG. Basic statistical reporting for articles published in biomedical journals: the "Statistical Analyses and Methods in the Published Literature" or the SAMPL Guidelines. *International journal of nursing studies*. 2015;52(1):5-9.
26. Curley G, Laffey JG, Kavanagh BP. Bench-to-bedside review: carbon dioxide. *Critical care (London, England)*. 2010;14(2):220.
27. Yokoyama I, Inoue Y, Kinoshita T, Itoh H, Kanno I, Iida H. Heart and brain circulation and CO<sub>2</sub> in healthy men. *Acta physiologica (Oxford, England)*. 2008;193(3):303-308.
28. Battisti-Charbonney A, Fisher J, Duffin J. The cerebrovascular response to carbon dioxide in humans. *J Physiol*. 2011;589(Pt 12):3039-3048.
29. Giardino ND, Friedman SD, Dager SR. Anxiety, respiration, and cerebral blood flow: implications for functional brain imaging. *Compr Psychiatry*. 2007;48(2):103-112.
30. Vranken NPA, Weerwind PW, Sutedja NA, Severdija EE, Barenbrug PJC, Maessen JG. Cerebral Oximetry and Autoregulation during Cardiopulmonary Bypass: A Review. *The journal of extra-corporeal technology*. 2017;49(3):182-191.
31. Severdija EE, Vranken NP, Simons AP, et al. Hemodilution Combined With Hypercapnia Impairs Cerebral Autoregulation During Normothermic Cardiopulmonary Bypass. *Journal of cardiothoracic and vascular anesthesia*. 2015;29(5):1194-1199.
32. Eastwood GM, Tanaka A, Bellomo R. Cerebral oxygenation in mechanically ventilated early cardiac arrest survivors: The impact of hypercapnia. *Resuscitation*. 2016;102:11-16.

- 1  
2  
3  
4 33. Murphy GS, Szokol JW, Avram MJ, et al. Effect of ventilation on cerebral  
5 oxygenation in patients undergoing surgery in the beach chair position: a  
6 randomized controlled trial. *British journal of anaesthesia*. 2014;113(4):618-  
7 627.  
8  
9  
10  
11 34. Brian Johnny E, MD. Carbon Dioxide and the Cerebral  
12 Circulation *Anesthesiology: The Journal of the American Society of*  
13 *Anesthesiologists*. 1998;88(5):1365-1386.  
14  
15  
16 35. Rogers CA, Stoica S, Ellis L, et al. Randomized trial of near-infrared  
17 spectroscopy for personalized optimization of cerebral tissue oxygenation during  
18 cardiac surgery. *British journal of anaesthesia*. 2017;119(3):384-393.  
19  
20  
21 36. Trafidlo T, Gaszynski T, Gaszynski W, Nowakowska-Domagala K.  
22 Intraoperative monitoring of cerebral NIRS oximetry leads to better  
23 postoperative cognitive performance: a pilot study. *International journal of*  
24 *surgery (London, England)*. 2015;16(Pt A):23-30.  
25  
26  
27 37. Casati A, Fanelli G, Pietropaoli P, et al. Continuous monitoring of cerebral  
28 oxygen saturation in elderly patients undergoing major abdominal surgery  
29 minimizes brain exposure to potential hypoxia. *Anesth Analg*. 2005;101(3):740-  
30 747, table of contents.  
31  
32  
33 38. Schoen J, Meyerrose J, Paarmann H, Heringlake M, Hueppe M, Berger K-U.  
34 Preoperative regional cerebral oxygen saturation is a predictor of postoperative  
35 delirium in on-pump cardiac surgery patients: a prospective observational trial.  
36 *Critical Care*. 2011;15(5):R218-R218.  
37  
38  
39 39. Finsterer U, Luhr HG, Wirth AE. Effects of acute hypercapnia and hypocapnia  
40 on plasma and red cell potassium, blood lactate and base excess in man during  
41 anesthesia. *Acta anaesthesiologica Scandinavica*. 1978;22(4):353-366.  
42  
43  
44 40. Adroque HJ, Madias NE. Changes in plasma potassium concentration during  
45 acute acid-base disturbances. *The American journal of medicine*.  
46 1981;71(3):456-467.  
47  
48  
49 41. Natalini G, Seramondi V, Fassini P, et al. Acute respiratory acidosis does not  
50 increase plasma potassium in normokalaemic anaesthetized patients. A  
51 controlled randomized trial. *European Journal of Anaesthesiology*.  
52 2006;18(6):394-400.  
53  
54  
55  
56  
57  
58  
59  
60



- 1  
2  
3  
4  
5  
6  
7  
8  
9  
10  
11  
12  
13  
14  
15  
16  
17  
18  
19  
20  
21  
22  
23  
24  
25  
26  
27  
28  
29  
30  
31  
32  
33  
34  
35  
36  
37  
38  
39  
40  
41  
42  
43  
44  
45  
46  
47  
48  
49  
50  
51  
52  
53  
54  
55  
56  
57  
58  
59  
60
42. Akca O. Pain and Tissue Oxygenation. *Critical care medicine*. 2015;43:e462-463.
43. Hoiseth LO, Hisdal J, Hoff IE, Hagen OA, Landsverk SA, Kirkeboen KA. Tissue oxygen saturation and finger perfusion index in central hypovolemia: influence of pain. *Crit Care Med*. 2015;43(4):747-756.
44. MacLeod DB, Ikeda K, Vacchiano C, Lobbstaël A, Wahr JA, Shaw AD. Development and validation of a cerebral oximeter capable of absolute accuracy. *Journal of cardiothoracic and vascular anesthesia*. 2012;26(6):1007-1014.
45. Watzman HM, Kurth CD, Montenegro LM, Rome J, Steven JM, Nicolson SC. Arterial and venous contributions to near-infrared cerebral oximetry. *Anesthesiology*. 2000;93(4):947-953.
46. Brady K, Joshi B, Zweifel C, et al. Real-time continuous monitoring of cerebral blood flow autoregulation using near-infrared spectroscopy in patients undergoing cardiopulmonary bypass. *Stroke*. 2010;41(9):1951-1956.
47. Davie SN, Grocott HP. Impact of extracranial contamination on regional cerebral oxygen saturation: a comparison of three cerebral oximetry technologies. *Anesthesiology*. 2012;116(4):834-840.
48. Akça O, Sessler DI, DeLong D, Keijner R, Ganzel B, Doufas AG. Tissue Oxygenation Response to Mild Hypercapnia during Cardiopulmonary Bypass with Constant Pump Output. *British journal of anaesthesia*. 2006;96(6):708-714.

## Figures

**Figure 1.** CONSORT flow diagram

(Please refer to the attached diagram)

**Figure 2.** Percentage change in cerebral oximetry from baseline ( $\% \Delta rSO_2$ ) over time

(Please refer to the attached diagram)

## Figure Captions

**Figure 1:**

The progress of all participants through the trial displayed by the Consolidated Standards Of Reporting Trials (CONSORT) flow diagram.

**Figure 2:**

The solid lines represent the mean percentage change; while the shaded areas represent the standard deviation. The targeted mild hypercapnia (TMH) group is represented by the red line and the red area; while the targeted normocapnia (TN) group is represented by the blue line and the blue area.

Left: percentage change of regional cerebral oxygen saturation from the baseline on the left hemisphere

Right: percentage change of regional cerebral oxygen saturation from the baseline on the right hemisphere

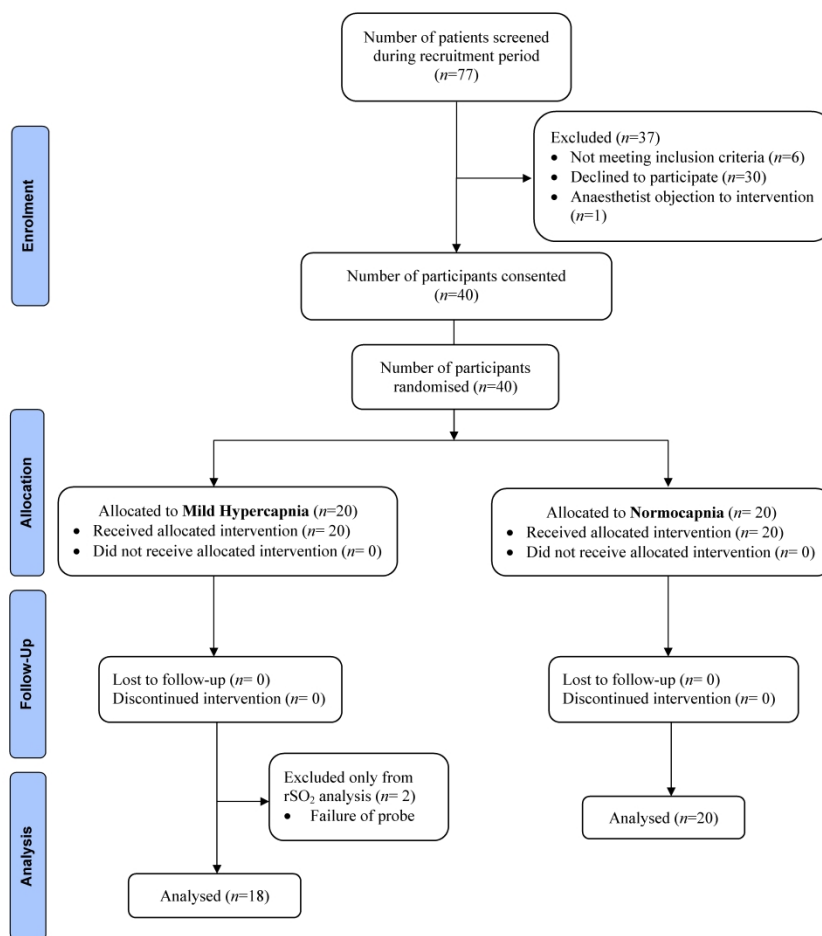

The progress of all participants through the trial displayed by the Consolidated Standards Of Reporting Trials (CONSORT) flow diagram.

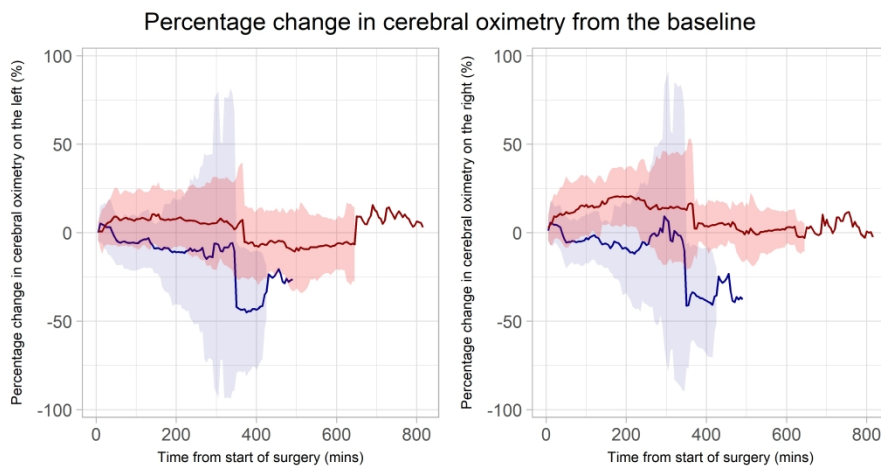

24 The solid lines represent the mean percentage change; while the shaded areas represent the standard  
25 deviation. The targeted mild hypercapnia (TMH) group is represented by the red line and the red area; while  
26 the targeted normocapnia (TN) group is represented by the blue line and the blue area.

27 Left: percentage change of regional cerebral oxygen saturation from the baseline on the left hemisphere  
28 Right: percentage change of regional cerebral oxygen saturation from the baseline on the right hemisphere

29 177x93mm (600 x 600 DPI)

## Supplementary File 1

```
1
2
3
4
5
6
7
8 #-----
9 --
10 # TITLE: Create oximetry database from raw data files
11 # Author: Clarence Wong
12 # Last updated: 2/7/2017
13 # RStudio v. 1.0.136
14 #-----
15 --
16
17 library(readr)
18 require(lubridate)
19 require(TTR)
20 require(xts)
21 require(zoo)
22 library(reshape2)
23
24
25
26 #-----
27 --
28 # Read all data files and save as R object
29 #-----
30 --
31
32
33 master<-0
34 for (i in 1:8)
35 {
36   file <-
37   read.csv(paste("D:/SS/R_data/FINAL_oximetry_data/",as.character(i),".csv",sep=""))
38   master <- rbind(master,file)
39 }
40
41 master$date_time <- paste(master$Date, master$Time..GMT.)
42 master$date_time <- mdy_hms(master$date_time)
43 converted_master <- master[,c(58,3:57)]
44
45 save(converted_master,file = "converted_master.RData")
46
47
48 database_times <- read_csv("D:/SS/R_data/database_times.csv")
49 date_vector <- database_times[,c(1,5,6,7,11,12)]
50
51 date_vector$start_date_time <- mdy_hms(paste(date_vector`Date of
52 surgery`,date_vector`Monitoring Start`))
53 date_vector$end_date_time <- mdy_hms(paste(date_vector`Date of
54 surgery`,date_vector`Monitoring End`))
55
56
57
58
59
60
```

```

1
2
3
4 date_vector$surg_start_date_time <- mdy_hms(paste(date_vector`Date of
5 surgery`,date_vector`Start Time`))
6 date_vector$surg_end_date_time <- mdy_hms(paste(date_vector`Date of
7 surgery`,date_vector`Finish Time`))
8
9
10 converted_date_vector <- date_vector[,c(1,7,8,9,10)]
11
12 save(converted_date_vector,file = "converted_date_vector.RData")
13
14 rm(master,date_vector,file)
15
16
17 #-----
18 --
19 # 1. Convert data types and locate monitoring periods
20 # 2. Identify oximetry values at various time points
21 # 3. Compute percentage change from baseline
22 # 4. Identify and locate problematic data
23 #-----
24 --
25
26
27 minutes_taken_as_baseline <- 2.5
28 minutes_interval <- 5
29
30
31 secs_taken_as_baseline <- minutes_taken_as_baseline*60
32 secs_interval <- minutes_interval*60
33
34 load("converted_master.RData")
35 load("converted_date_vector.RData")
36 print("data loaded. check data version")
37
38
39 oximetry_L <-
40 as.numeric(levels(converted_master$RSO2_A1)[converted_master$RSO2_A1])
41 oximetry_R <-
42 as.numeric(levels(converted_master$RSO2_A2)[converted_master$RSO2_A2])
43 PSI <- as.numeric(levels(converted_master$PSI)[converted_master$PSI])
44
45
46 # monitoring duration
47 duration_mins <-
48 difftime(converted_date_vector$end_date_time,converted_date_vector$start_date_time,uni
49 ts = "mins")
50 duration_secs <-
51 difftime(converted_date_vector$end_date_time,converted_date_vector$start_date_time,uni
52 ts = "secs")
53
54
55 locate_start = seq(-1,-1,length.out = dim(converted_date_vector)[1])
56
57
58
59
60

```

```

1
2
3
4
5 for (i in 1:dim(converted_date_vector)[1]){
6   if(length(which(converted_date_vector$start_date_time[i]==converted_master$date_time))
7     ==1)
8     {
9       locate_start[i] <-
10      which(converted_date_vector$start_date_time[i]==converted_master$date_time)
11    }
12  }
13 }
14
15
16 # create final_oximetry data frame
17 final_oximetry <- data.frame()
18 baseline_L_mu<-baseline_L_std<-baseline_L_N<-baseline_R_mu<-baseline_R_std<-
19 baseline_R_N<-rep(9999,dim(converted_date_vector)[1])
20 num_time_pts <- rep(1,40)
21
22 for(j in 1:dim(converted_date_vector)[1])
23 {
24   # for each patient
25   if(locate_start[j]==-1)
26     {
27       p_id <- j
28       time_id<-minute_from_baseline<-percentage_total_monitoring_period<-L_delta<-
29       L_mu<-L_sig<-L_N<-R_delta<-R_mu<-R_sig<-R_N<-PSI_mu<-9999
30
31     } else{
32
33       locate_baseline <- locate_start[j]+secs_taken_as_baseline/2
34       locate_times <- seq(0,0)
35       num_measurements <- (as.numeric(duration_secs)[j]-
36         secs_taken_as_baseline)%/%secs_interval + 1
37       num_time_pts[j] <- num_measurements
38       locate_times[1] <- locate_baseline
39       locate_times[2] <- locate_times[1] + secs_interval/2
40       locate_times[2:num_measurements]<-
41       seq(locate_times[2],locate_start[j]+as.numeric(duration_secs[j])/2,by=secs_interval/2)
42       locate_times[num_measurements+1]<-locate_start[j]+as.numeric(duration_secs[j])/2
43
44       baseline_L_mu[j] <- mean(oximetry_L[locate_start[j]:(locate_baseline-1)],na.rm =
45       TRUE)
46       baseline_L_std[j] <- sd(oximetry_L[locate_start[j]:(locate_baseline-1)],na.rm = TRUE)
47       baseline_L_N[j] <- length(oximetry_L[locate_start[j]:(locate_baseline-1)])-
48       sum(is.na(oximetry_L[locate_start[j]:(locate_baseline-1)]))
49
50
51
52
53
54
55
56
57
58
59
60

```

```

1
2
3
4     baseline_R_mu[j] <- mean(oximetry_R[locate_start[j]:(locate_baseline-1)],na.rm =
5 TRUE)
6     baseline_R_std[j] <- sd(oximetry_R[locate_start[j]:(locate_baseline-1)],na.rm = TRUE)
7     baseline_R_N[j] <- length(oximetry_R[locate_start[j]:(locate_baseline-1)])-
8 sum(is.na(oximetry_R[locate_start[j]:(locate_baseline-1)]))
9
10
11     L_delta <- L_mu <- L_sig <- L_N <- R_delta <- R_mu <- R_sig <- R_N <- PSI_mu <-
12 seq(0,0)
13
14     for (k in 1:num_measurements)
15     {
16         L_mu[k] <- mean(oximetry_L[locate_times[k]:(locate_times[k+1]-1)],na.rm = TRUE)
17         L_sig[k] <- sd(oximetry_L[locate_times[k]:(locate_times[k+1]-1)],na.rm = TRUE)
18         L_N[k] <- length(oximetry_L[locate_times[k]:(locate_times[k+1]-1)])-
19 sum(is.na(oximetry_L[locate_times[k]:(locate_times[k+1]-1)]))
20
21         R_mu[k] <- mean(oximetry_R[locate_times[k]:(locate_times[k+1]-1)],na.rm = TRUE)
22         R_sig[k] <- sd(oximetry_R[locate_times[k]:(locate_times[k+1]-1)],na.rm = TRUE)
23         R_N[k] <- length(oximetry_R[locate_times[k]:(locate_times[k+1]-1)])-
24 sum(is.na(oximetry_R[locate_times[k]:(locate_times[k+1]-1)]))
25
26         PSI_mu[k] <- mean(PSI[locate_times[k]:(locate_times[k+1]-1)],na.rm = TRUE)
27     }
28
29     L_delta <- (L_mu/baseline_L_mu[j] - 1)*100
30     R_delta <- (R_mu/baseline_R_mu[j] - 1)*100
31
32     time_id <- 1:num_measurements
33     minute_from_baseline <- c(seq(minutes_interval,minutes_interval*(num_measurements-
34 1), by = minutes_interval),as.numeric(duration_mins[j]-minutes_taken_as_baseline))
35     p_id <- rep(j,num_measurements)
36     percentage_total_monitoring_period <-
37 ((minute_from_baseline*60+secs_taken_as_baseline)/as.numeric(duration_secs[j]))*100
38
39     }
40
41     temp_df <-
42 data.frame(p_id,time_id,minute_from_baseline,percentage_total_monitoring_period,L_delt
43 a,L_mu,L_sig,L_N,R_delta,R_mu,R_sig,R_N,PSI_mu)
44     final_oximetry <- rbind(final_oximetry,temp_df)
45     rm(temp_df)
46
47 }
48
49 missing_L <- unique(final_oximetry$p_id[is.na(final_oximetry$L_delta)])
50
51
52
53
54
55
56
57
58
59
60

```



```
1
2
3
4 missing_R <- unique(final_oximetry$p_id[is.na(final_oximetry$R_delta)])
5 percentage_total_missing_L <-
6 100*(rle(final_oximetry$p_id[is.na(final_oximetry$L_delta)])$lengths) /
7 (num_time_pts[unique(final_oximetry$p_id[is.na(final_oximetry$L_delta)])])
8 percentage_total_missing_R <-
9 100*(rle(final_oximetry$p_id[is.na(final_oximetry$R_delta)])$lengths) /
10 (num_time_pts[unique(final_oximetry$p_id[is.na(final_oximetry$R_delta)])])
11 missing_data <- unique(final_oximetry$p_id[(final_oximetry$L_delta==9999)])
12 missing_data <- missing_data[!is.na(missing_data)]
13 missing_PSI <- unique(final_oximetry$p_id[is.na(final_oximetry$PSI_mu)])
14 percentage_total_missing_PSI <-
15 100*(rle(final_oximetry$p_id[is.na(final_oximetry$PSI_mu)])$lengths) /
16 (num_time_pts[unique(final_oximetry$p_id[is.na(final_oximetry$PSI_mu)])])
17
18
19
20 print("there are missing delta oximetry values in the following patients")
21 print(missing_L)
22 print(percentage_total_missing_L)
23
24
25 print(missing_R)
26 print(percentage_total_missing_R)
27
28
29 print(missing_data)
30
31 print("there are missing PSI values in the following patients")
32 print(missing_PSI)
33 print(percentage_total_missing_PSI)
34
35
36 other_data <-
37 data.frame(num_time_pts,baseline_L_mu,baseline_L_std,baseline_L_N,baseline_R_mu,
38 baseline_R_std,baseline_R_N)
39 other_data[is.na(other_data)]<-9999
40 save(other_data, file="other_data.RData")
41
42 final_oximetry[is.na(final_oximetry)]<-9999
43 save(final_oximetry,file = "final_oximetry.RData")
44
45
46
47 #-----
48 --
49 # 1. Convert baseline characteristic database from wide to long format
50 # 2. Incorporating oximetry data in the database with time as a nested data in the hierarchy
51 # 3. Create final database
52 #-----
53
54 --
```

```
1
2
3
4 load("final_oximetry.RData")
5 load("other_data.RData")
6 print("check if final oximetry is latest")
7
8
9 baseline_results <- read.csv("D:/SS/R_data/FINAL_oximetry_data/all_baseline.csv",
10 sep=",", stringsAsFactors=FALSE)
11
12 baseline_results$baseline_L_mu <- other_data$baseline_L_mu
13 baseline_results$baseline_L_std <- other_data$baseline_L_std
14 baseline_results$baseline_L_N <- other_data$baseline_L_N
15 baseline_results$baseline_R_mu <- other_data$baseline_R_mu
16 baseline_results$baseline_R_std <- other_data$baseline_R_std
17 baseline_results$baseline_R_N <- other_data$baseline_R_N
18
19
20 baseline_results$P_id <- index(baseline_results)
21
22 baseline_results[baseline_results == "#N/A"]<-9999
23
24
25 #generate baseline_results with the same number of rows as final oximetry
26 baseline_results <- baseline_results[rep(seq_len((40)),num_time_pts),]
27
28
29
30 all_results <- cbind(baseline_results,final_oximetry)
31 if (sum(1*(all_results$P_id != all_results$p_id))==0)
32 {
33   all_results <- all_results[,c(which(colnames(all_results)== "p_id"),1:109,112:122)]
34 }
35
36 save(all_results,file = "all_results.RData")
37
38 #UNCOMMENT TO WRITE CSV
39 #-----
40 write.csv(all_results, file="all_results.csv")
41
42
43
44
45
46
47
48
49
50
51
52
53
54
55
56
57
58
59
```

## Supplementary File 2

```
1
2
3
4
5
6
7
8 #-----
9 -----
10 # TITLE: Create baseline patient and surgical characteristics table, oximetry table, and
11 oximetry graphs
12 # Author: Clarence Wong
13 # Last updated: 2/7/2017
14 # RStudio v. 1.0.136
15 #-----
16 -----
17
18
19 library(readr)
20 require(lubridate)
21 require(TTR)
22 require(xts)
23 require(zoo)
24 require(tableone)
25 require(ggplot2)
26 library(grid)
27 require(gridExtra)
28 require(quantreg)
29
30
31 #-----
32 -----
33
34 # 1. Create summary statistics for baseline characteristics
35 # 2. Perform statistical analysis on secondary outcomes. e.g post-operative delirium
36 # 3. Export tables in csv files
37 # Requires baseline characteristic and baseline oximetry data.
38 #-----
39 -----
40
41
42 baseline_db <- read.csv("D:/SS/R_data/baseline/all_baseline.csv", sep=",",
43 stringsAsFactors=TRUE)
44 load("other_data.RData")
45
46
47 other_data <- other_data[-c(1,2),]
48
49
50 baseline_db$baseline_L_mu <- other_data$baseline_L_mu
51 baseline_db$baseline_L_std <- other_data$baseline_L_std
52 baseline_db$baseline_L_N <- other_data$baseline_L_N
53 baseline_db$baseline_R_mu <- other_data$baseline_R_mu
54 baseline_db$baseline_R_std <- other_data$baseline_R_std
55 baseline_db$baseline_R_N <- other_data$baseline_R_N
56
57
58 baseline_db$P_id <- index(baseline_db)
59
60
```

```

1
2
3
4 baseline_db[baseline_db == "#N/A"]<-NA
5 baseline_db[baseline_db == 9999]<-NA
6 baseline_db$pCO2_2<-
7 as.numeric(levels(baseline_db$pCO2_2))[baseline_db$pCO2_2]
8 baseline_db$BMI<-as.numeric(levels(baseline_db$BMI))[baseline_db$BMI]
9 vars <-
10 c("Gender","Age","Weight","BMI","ASA","Diabetes","COPD","Malignancy","Other_C
11 omorbidities",
12 "Surgery_type","Duration_Surgery_Minutes","baseline_L_mu","baseline_R_mu")
13
14 factorVars <- c("ASA","Diabetes","COPD","Malignancy","Other_Comorbidities")
15 Tableone <- CreateTableOne(vars,"Group",baseline_db,factorVars)
16
17
18
19
20 baseline_db$LOS<-as.numeric(levels(baseline_db$LOS))[baseline_db$LOS]
21 baseline_db$pH_2<-as.numeric(levels(baseline_db$pH_2))[baseline_db$pH_2]
22 baseline_db$HCO3._2<-
23 as.numeric(levels(baseline_db$HCO3._2))[baseline_db$HCO3._2]
24 baseline_db$Base_excess_2<-
25 as.numeric(levels(baseline_db$Base_excess_2))[baseline_db$Base_excess_2]
26 baseline_db$Potassium_2<-
27 as.numeric(levels(baseline_db$Potassium_2))[baseline_db$Potassium_2]
28 baseline_db$Total_Hb_2<-
29 as.numeric(levels(baseline_db$Total_Hb_2))[baseline_db$Total_Hb_2]
30
31
32
33 baseline_db$pH<-apply(baseline_db[,c("pH_1","pH_2")],1,mean,na.rm=TRUE)
34 baseline_db$pCO2<-
35 apply(baseline_db[,c("pCO2_1","pCO2_2")],1,mean,na.rm=TRUE)
36 baseline_db$HCO3.<-
37 apply(baseline_db[,c("HCO3._1","HCO3._2")],1,mean,na.rm=TRUE)
38 baseline_db$Base_excess<-
39 apply(baseline_db[,c("Base_excess_1","Base_excess_2")],1,mean,na.rm=TRUE)
40 baseline_db$Potassium<-
41 apply(baseline_db[,c("Potassium_1","Potassium_2")],1,mean,na.rm=TRUE)
42 baseline_db$Total_Hb<-
43 apply(baseline_db[,c("Total_Hb_1","Total_Hb_2")],1,mean,na.rm=TRUE)
44
45
46
47 vars_2 <-
48 c("Surgery_type","Duration_Surgery_Minutes","baseline_L_mu","baseline_R_mu","L
49 OS",
50
51 "pH","pCO2","HCO3.","Base_excess","Potassium","Total_Hb","post_op_delirium")
52 factorVars_2 <- c("post_op_delirium")
53 Tabletwo <- CreateTableOne(vars_2,"Group",baseline_db,factorVars_2,argsExact =
54 "post_op_delirium")
55
56
57 print(Tabletwo,exact = "post_op_delirium",nonnormal =
58 c("Duration_Surgery_Minutes","baseline_L_mu","baseline_R_mu",
59
60

```

```

1
2
3
4
5 "LOS", "pH", "pCO2", "HCO3.", "Base_excess", "Potassium", "Total_Hb"))
6
7
8
9 write.csv(print(Tabletwo, exact = "post_op_delirium", nonnormal =
10 c("Duration_Surgery_Minutes", "baseline_L_mu",
11
12 "baseline_R_mu", "LOS", "pH", "pCO2", "HCO3.",
13 "Base_excess", "Potassium", "Total_Hb")),
14 "Table_Two.csv")
15
16
17 #-----
18 -----
19 # 1. Create summary statistics for percentage change of regional cerebral oxygen
20 saturation
21 # 2. Create plots for regional cerebral oxygen saturation over time
22 # 3. Export oximetry tables in csv files
23 # Requires baseline characteristic and baseline oximetry data.
24 #-----
25 -----
26
27
28 #-----
29 -----
30
31 # Normocapnic group
32
33 plot_db <- read.csv("D:/SS/R_data/oximetry/MASTER_results_deleted_missing.csv",
34 sep=",", stringsAsFactors=TRUE)
35
36 plot_db[plot_db == "#N/A"] <- NA
37 plot_db[plot_db == 9999] <- NA
38
39
40 normocapnia <- subset(plot_db, Group %in% 0)
41 hypercapnia <- subset(plot_db, Group %in% 1)
42
43 normo_plot <- ggplot(normocapnia, aes(x=minute_from_baseline, y=L_delta,
44 group=p_id)) + geom_line() + geom_point()+
45 ggtitle("normocapnia: L delta")+ xlab("Time since start of operation (mins)")+
46 ylab("% change in oximetry from baseline")
47
48
49 hyper_plot <- ggplot(hypercapnia, aes(x=minute_from_baseline, y=L_delta,
50 group=p_id)) + geom_line() + geom_point()+
51 ggtitle("hypercapnia: L delta")+ xlab("Time since start of operation (mins)")+ ylab("%
52 change in oximetry from baseline")
53
54
55 means <- tapply(normocapnia$L_delta, normocapnia$time_id, function(x) mean(x, na.rm
56 = TRUE))
57 stdevs <- tapply(normocapnia$L_delta, normocapnia$time_id, function(x) sd(x, na.rm =
58 TRUE))
59
60

```

```

1
2
3
4 N <- tapply(normocapnia$L_delta,normocapnia$time_id,function(x)
5 length(x[!is.na(x)]))
6
7
8 normo_df_L <- data.frame(means,stdevs)
9 times<- index(normo_df_L)*5
10 normo_df_L <- data.frame(means,stdevs,N, times)
11 total_normo_L <- ggplot(normo_df_L, aes(x=times, y=means)) +
12 geom_line(colour="blue4") +
13   geom_ribbon(normo_df_L,mapping = aes(x=times,
14 ymax=means+stdevs,ymin=means-stdevs),fill="blue4",alpha=0.1)
15
16
17 means <- tapply(normocapnia$R_delta,normocapnia$time_id,function(x) mean(x,
18 na.rm = TRUE))
19 stdevs <- tapply(normocapnia$R_delta,normocapnia$time_id,function(x) sd(x, na.rm =
20 TRUE))
21 N <- tapply(normocapnia$R_delta,normocapnia$time_id,function(x)
22 length(x[!is.na(x)]))
23
24
25 normo_df_R <- data.frame(means,stdevs)
26 times<- index(normo_df_R)*5
27 normo_df_R <- data.frame(means,stdevs,N, times)
28 total_normo_R <- ggplot(normo_df_R, aes(x=times, y=means)) +
29 geom_line(colour="blue4") +
30   geom_ribbon(normo_df_R,mapping = aes(x=times,
31 ymax=means+stdevs,ymin=means-stdevs),fill="blue4",alpha=0.1)
32
33
34 #-----
35 -----
36 # Hypercapnic group
37
38
39 means <- tapply(hypercapnia$L_delta,hypercapnia$time_id,function(x) mean(x, na.rm
40 = TRUE))
41 stdevs <- tapply(hypercapnia$L_delta,hypercapnia$time_id,function(x) sd(x, na.rm =
42 TRUE))
43 N <- tapply(hypercapnia$L_delta,hypercapnia$time_id,function(x) length(x[!is.na(x)]))
44
45
46 hyper_df_L <- data.frame(means,stdevs)
47 times<- index(hyper_df_L)*5
48 hyper_df_L <- data.frame(means,stdevs,N, times)
49 total_hyper_L <- ggplot(hyper_df_L, aes(x=times, y=means))
50
51
52 means <- tapply(hypercapnia$R_delta,hypercapnia$time_id,function(x) mean(x, na.rm
53 = TRUE))
54 stdevs <- tapply(hypercapnia$R_delta,hypercapnia$time_id,function(x) sd(x, na.rm =
55 TRUE))
56 N <- tapply(hypercapnia$R_delta,hypercapnia$time_id,function(x) length(x[!is.na(x)]))
57
58
59 hyper_df_R <- data.frame(means,stdevs)
60

```

```

1
2
3
4 times<- index(hyper_df_R)*5
5 hyper_df_R <- data.frame(means,stdevs,N, times)
6 total_hyper_R <- ggplot(hyper_df_R, aes(x=times, y=means))
7
8
9 total_L <- total_normo_L +
10   geom_ribbon(hyper_df_L,mapping = aes(x=times, ymax=means+stdevs,ymin=means-
11   stdevs),fill="red2",alpha=0.2) +
12   geom_line(hyper_df_L,mapping = aes(x=times, y=means),colour="red4")+
13   theme_light() +
14   xlab("Time since start of surgery (mins)")+ ylab("Average % change in cerebral
15   oximetry on the left") +
16   theme(axis.title.y = element_text(size = rel(0.65), angle = 90)) +
17   theme(axis.title.x = element_text(size = rel(0.65), angle = 00))
18
19
20 total_R <- total_normo_R +
21   geom_ribbon(hyper_df_R,mapping = aes(x=times, ymax=means+stdevs,ymin=means-
22   stdevs),fill="red2",alpha=0.2) +
23   geom_line(hyper_df_R,mapping = aes(x=times, y=means),colour="red4")+
24   theme_light() +
25   xlab("Time since start of surgery (mins)")+ ylab("Average % change in cerebral
26   oximetry on the right") +
27   scale_color_manual(values=c("red4","blue4"))+
28   theme(axis.title.y = element_text(size = rel(0.65), angle = 90)) +
29   theme(axis.title.x = element_text(size = rel(0.65), angle = 00))
30
31
32
33 #tiff('oximetry_graph_high_res.tiff', units="in", width=7, height=3.6667, res=600,
34   compression = 'lzw')
35
36
37 grid.arrange(total_L, total_R, ncol = 2, top=textGrob("Percentage change in cerebral
38   oximetry from baseline",
39               gp=gpar(fontsize=11,fontfamily="Times")),
40   vp=viewport(width=0.9, height=0.9))
41
42 #insert ggplot code
43 #dev.off()
44
45 temp_hyper_L <- t(paste(round(hyper_df_L$mean,1)," (",
46   round(hyper_df_L$stdev,1),")", " {" , hyper_df_L$N, " }", sep = ""))
47 temp_normo_L <- t(paste(round(normo_df_L$mean,1)," (",
48   round(normo_df_L$stdev,1),")", " {" , normo_df_L$N, " }", sep = ""))
49
50
51 temp_hyper_R <- t(paste(round(hyper_df_R$mean,1)," (",
52   round(hyper_df_R$stdev,1),")", " {" , hyper_df_R$N, " }", sep = ""))
53 temp_normo_R <- t(paste(round(normo_df_R$mean,1)," (",
54   round(normo_df_R$stdev,1),")", " {" , normo_df_R$N, " }", sep = ""))
55
56
57 write.csv( temp_normo_L , "normo_df_L.csv")
58 write.csv( temp_normo_R , "normo_df_R.csv")
59
60

```

```
1  
2  
3  
4 write.csv( temp_hyper_L , "hyper_df_L.csv")  
5 write.csv( temp_hyper_R , "hyper_df_R.csv")  
6  
7  
8  
9  
10  
11  
12  
13  
14  
15  
16  
17  
18  
19  
20  
21  
22  
23  
24  
25  
26  
27  
28  
29  
30  
31  
32  
33  
34  
35  
36  
37  
38  
39  
40  
41  
42  
43  
44  
45  
46  
47  
48  
49  
50  
51  
52  
53  
54  
55  
56  
57  
58  
59  
60
```

For peer review only



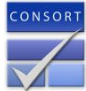

## CONSORT 2010 checklist of information to include when reporting a randomised trial\*

| Section/Topic                    | Item No | Checklist item                                                                                                                                                                              | Reported on page No |
|----------------------------------|---------|---------------------------------------------------------------------------------------------------------------------------------------------------------------------------------------------|---------------------|
| <b>Title and abstract</b>        |         |                                                                                                                                                                                             |                     |
|                                  | 1a      | Identification as a randomised trial in the title                                                                                                                                           | 1                   |
|                                  | 1b      | Structured summary of trial design, methods, results, and conclusions (for specific guidance see CONSORT for abstracts)                                                                     | 2                   |
| <b>Introduction</b>              |         |                                                                                                                                                                                             |                     |
| Background and objectives        | 2a      | Scientific background and explanation of rationale                                                                                                                                          | 5                   |
|                                  | 2b      | Specific objectives or hypotheses                                                                                                                                                           | 5                   |
| <b>Methods</b>                   |         |                                                                                                                                                                                             |                     |
| Trial design                     | 3a      | Description of trial design (such as parallel, factorial) including allocation ratio                                                                                                        | 6                   |
|                                  | 3b      | Important changes to methods after trial commencement (such as eligibility criteria), with reasons                                                                                          | 6                   |
| Participants                     | 4a      | Eligibility criteria for participants                                                                                                                                                       | 6                   |
|                                  | 4b      | Settings and locations where the data were collected                                                                                                                                        | 6                   |
| Interventions                    | 5       | The interventions for each group with sufficient details to allow replication, including how and when they were actually administered                                                       | 6-8                 |
| Outcomes                         | 6a      | Completely defined pre-specified primary and secondary outcome measures, including how and when they were assessed                                                                          | 7-9                 |
|                                  | 6b      | Any changes to trial outcomes after the trial commenced, with reasons                                                                                                                       | 7                   |
| Sample size                      | 7a      | How sample size was determined                                                                                                                                                              | 10                  |
|                                  | 7b      | When applicable, explanation of any interim analyses and stopping guidelines                                                                                                                | N/A                 |
| <b>Randomisation:</b>            |         |                                                                                                                                                                                             |                     |
| Sequence generation              | 8a      | Method used to generate the random allocation sequence                                                                                                                                      | 6                   |
|                                  | 8b      | Type of randomisation; details of any restriction (such as blocking and block size)                                                                                                         | 6                   |
| Allocation concealment mechanism | 9       | Mechanism used to implement the random allocation sequence (such as sequentially numbered containers), describing any steps taken to conceal the sequence until interventions were assigned | 6                   |
| Implementation                   | 10      | Who generated the random allocation sequence, who enrolled participants, and who assigned participants to interventions                                                                     | 6-7                 |
| Blinding                         | 11a     | If done, who was blinded after assignment to interventions (for example, participants, care providers, those                                                                                | 6-7                 |

|    |                          |                                                             |                                                                                                                  |          |
|----|--------------------------|-------------------------------------------------------------|------------------------------------------------------------------------------------------------------------------|----------|
| 1  |                          | assessing outcomes) and how                                 |                                                                                                                  |          |
| 2  | 11b                      | If relevant, description of the similarity of interventions | 9                                                                                                                |          |
| 3  | Statistical methods      | 12a                                                         | Statistical methods used to compare groups for primary and secondary outcomes                                    | 10-11    |
| 4  |                          | 12b                                                         | Methods for additional analyses, such as subgroup analyses and adjusted analyses                                 | 10-11    |
| 5  |                          |                                                             |                                                                                                                  |          |
| 6  | <b>Results</b>           |                                                             |                                                                                                                  |          |
| 7  | Participant flow (a      | 13a                                                         | For each group, the numbers of participants who were randomly assigned, received intended treatment, and         | 12       |
| 8  | diagram is strongly      |                                                             | were analysed for the primary outcome                                                                            |          |
| 9  | recommended)             | 13b                                                         | For each group, losses and exclusions after randomisation, together with reasons                                 | 12       |
| 10 | Recruitment              | 14a                                                         | Dates defining the periods of recruitment and follow-up                                                          | 6        |
| 11 |                          | 14b                                                         | Why the trial ended or was stopped                                                                               | N/A      |
| 12 | Baseline data            | 15                                                          | A table showing baseline demographic and clinical characteristics for each group                                 | 12-13    |
| 13 | Numbers analysed         | 16                                                          | For each group, number of participants (denominator) included in each analysis and whether the analysis was      | 12       |
| 14 |                          |                                                             | by original assigned groups                                                                                      |          |
| 15 | Outcomes and             | 17a                                                         | For each primary and secondary outcome, results for each group, and the estimated effect size and its            | 14,16,17 |
| 16 | estimation               |                                                             | precision (such as 95% confidence interval)                                                                      |          |
| 17 |                          | 17b                                                         | For binary outcomes, presentation of both absolute and relative effect sizes is recommended                      | 14       |
| 18 | Ancillary analyses       | 18                                                          | Results of any other analyses performed, including subgroup analyses and adjusted analyses, distinguishing       | 16       |
| 19 |                          |                                                             | pre-specified from exploratory                                                                                   |          |
| 20 | Harms                    | 19                                                          | All important harms or unintended effects in each group (for specific guidance see CONSORT for harms)            | 21       |
| 21 |                          |                                                             |                                                                                                                  |          |
| 22 | <b>Discussion</b>        |                                                             |                                                                                                                  |          |
| 23 | Limitations              | 20                                                          | Trial limitations, addressing sources of potential bias, imprecision, and, if relevant, multiplicity of analyses | 22-23    |
| 24 | Generalisability         | 21                                                          | Generalisability (external validity, applicability) of the trial findings                                        | 21-22    |
| 25 | Interpretation           | 22                                                          | Interpretation consistent with results, balancing benefits and harms, and considering other relevant evidence    | 19-21    |
| 26 |                          |                                                             |                                                                                                                  |          |
| 27 | <b>Other information</b> |                                                             |                                                                                                                  |          |
| 28 | Registration             | 23                                                          | Registration number and name of trial registry                                                                   | 3        |
| 29 | Protocol                 | 24                                                          | Where the full trial protocol can be accessed, if available                                                      | 3        |
| 30 | Funding                  | 25                                                          | Sources of funding and other support (such as supply of drugs), role of funders                                  | 4        |

36  
37 \*We strongly recommend reading this statement in conjunction with the CONSORT 2010 Explanation and Elaboration for important clarifications on all the items. If relevant, we also  
38 recommend reading CONSORT extensions for cluster randomised trials, non-inferiority and equivalence trials, non-pharmacological treatments, herbal interventions, and pragmatic trials.  
39 Additional extensions are forthcoming: for those and for up to date references relevant to this checklist, see [www.consort-statement.org](http://www.consort-statement.org).  
40  
41  
42
